# Supplementary material
Source: PubMed Central journal article supplement (PMC2677729)
Supplement: NIHMS74182-supplement-1.pdf [file NIHMS74182-supplement-1.pdf]

## Supplementary Information

### Supplementary Results

**Taxonomic assignments of metagenomic reads: assessing the value of reference genomes** - The International Human Microbiome Program has emphasized the importance of sequencing the genomes of a panel of reference microbial strains<sup>1</sup>. One fundamental parameter that governs the utility of reference genomes is the ability to accurately assign fragmentary reads from metagenomic datasets to these genomes. Therefore, we compared the filtered pyrosequencer reads to a custom database of 44 human gut-associated bacterial and archaeal genomes (**Supplementary Fig. 7** and **Supplementary Information**) using BLASTX, and validated these assignments independently against the NCBI non-redundant protein database. The relative abundance of sequences from the 18 individual microbiome datasets assigned to each reference genome was highly variable (see **Supplementary Fig. 7**;  $R^2=0.26\pm 0.02$  for all pairwise comparisons of taxonomic profiles), consistent with the considerable heterogeneity in microbial community structure among the fecal microbiomes that we had observed from sequencing 16S rRNA gene amplicons.

Our custom database of 44 reference genomes included 23 Firmicutes but only 14 Bacteroidetes. Since the Firmicutes dominate the gut microbiotas of our subjects (**Supplementary Fig. 6**), and the reference genome database, we might expect that reads assigned to Firmicutes would match the reference genomes more closely than reads assigned to Bacteroidetes. The opposite was true: on average,  $46.3\pm 2.6\%$  of the pyrosequencing reads assigned to Bacteroidetes matched the reference genomes at 100% identity, as opposed to  $16.7\pm 1.1\%$  of the reads assigned to Firmicutes ( $p < 10^{-4}$ , Mann

Whitney; **Supplementary Figs. 8,9**). This observation underscores the high level of diversity within the gut-associated Firmicutes, indicates that the readily culturable sequenced gut Firmicutes are not closely related to the abundant gut genomes present in these 18 microbiomes, and suggests that future reference microbial genome sequencing efforts should be directed towards representatives of this dominant bacterial phylum.

**Supplementary Fig. 10** summarizes the relative abundance of the major bacterial phyla present in these 18 microbiomes, as defined by six different approaches (sequencing full-length, V2 and V6 amplicons; BLAST comparisons of shotgun pyrosequencer reads with the NCBI non-redundant and the custom 44 gut genome databases, plus analysis of microbiome-derived 16S rRNA gene fragments). Pairwise comparisons of relative abundance data from 16S rRNA gene fragments generated from shotgun sequencing reads correlate most closely with V2 PCR data (see **Supplementary Fig. 10** and the next section).

**Cross-comparison of taxonomic assignments** - A frequently reported result from any 16S rRNA gene sequence-based survey is the relative abundance of bacterial phyla<sup>6-8</sup>. Given the broad nature of these phyla and the fact that relatively few phyla dominate the human distal gut microbiota, one might expect the relative abundance of each phylum to be consistent regardless of the amplification and sequencing methods used. However, we observed differences between methods (**Supplementary Fig. 10A-E**). Relative to the sampled gut microbiomes (defined by pyrosequencing of total community DNA), the full-length, V2, and V6 16S rRNA gene datasets were all significantly depleted for Bacteroidetes (paired Student's t-test,  $p < 0.001$ ), and significantly enriched for Firmicutes ( $p < 0.01$ ). One possible explanation for these differences is that the Bacteroidetes reference genomes are more closely related to those

in the microbiomes than the Firmicutes reference genomes, thereby inflating estimates of the relative abundance of this phylum (**Supplementary Fig. 8**). To address this potential confounding factor, we identified 16S rRNA gene fragments from all 18 microbiome datasets (see Supplementary Methods below) and classified them taxonomically. The results of this analysis confirmed that the three PCR-based methods underestimate the relative abundance of the Bacteroidetes (**Supplementary Fig. 10F**). However, results obtained from shotgun sequencing 16S rRNA gene fragments and PCR amplification of the V2 region showed the strongest correlation (**Supplementary Fig. 10G**).

**Phylotype sampling model** - We developed a sampling model that allows us to place bounds on the maximum abundance of any phylotype found across all samples. The principle here is that if a given phylotype made up not less than some proportion  $p$  of the fecal microbiome of all samples, we can calculate (i) the number of samples of a given size that we would expect to lack that phylotype due to sampling error, and (ii) the probability that we would observe an actual proportion ( $\hat{p}$ ) as low as the minimum abundance observed in any sample.

The probability  $P$  of failing to observe a given microbe at proportion  $p$  in a sample of size  $n$  is given by Poisson statistics as simply  $e^{-pn}$ . For equal sample sizes, we can therefore calculate the probability of observing the phylotype in at least  $k$  samples using binomial sampling with  $\text{Pr}(\text{success}) = (1-P)$ . We can then use the inverse binomial to ask what value of  $P$ , and therefore of  $p$ , gives a specified probability (say, 5%) of observing a given phylotype in as few samples as actually observed for the most abundant phylotype. This calculation yields an upper bound for  $p$  (i.e., the value of  $p$  at which we can reject the idea that we would have seen the phylotype in as few samples as actually observed at the 95% confidence level).

For unequal sizes, there is no analytical solution to the equivalent of the binomial in which  $\text{Pr}(\text{success})$  differs for each trial (M. Lladser, personal communication). We must therefore solve for  $p$  using numerical optimization. Because the function relating  $p$  and the probability of observing the phylotype in at least a given number of samples is monotonic, we can use a bisection search (bounded by  $p=0$  and  $p=1$ ) to find the appropriate value of  $p$  for a desired confidence level. In practice, we calculate  $P$  for each sample, choose a vector of random numbers between 0 and 1, and count the number of times the random number at a given position was less than  $P$ . Repeating this procedure for a fixed number of iterations (100,000 for the reported values) gives sufficiently smooth values to approximate the monotonic function and to allow the bisection search to converge on the same value of  $p$  to three significant figures across repeated trials.

In the case where a phylotype is found in all samples, we can use a similar procedure to identify the maximum value of  $p$  consistent with the observed minimum abundance of the phylotype whose minimum abundance across all samples is highest. In this case, instead of calculating the fraction of samples in which the phylotype is absent, we can (i) use binomial sampling to randomly sample the number of observed counts of a phylotype given the parametric value of  $p$  and the sample size of each sample, (ii) measure the minimum abundance across all samples, and (iii) compare this minimum abundance to the minimum abundance actually observed. Again, an analytical solution using extreme-value statistics is possible if sample sizes are equal, but the solution must be obtained by numerical methods (in this case, the same type of bisection search used above). The sampling model was implemented in Python using PyCogent<sup>34</sup>.

Our sampling model allows us to ask what level of abundance the most abundant phylotype could have in every individual before its absence from or limited



representation in some samples becomes surprising. For example, with 1,000 sequences/samples, we would be very surprised if we failed to recover a shared phylotype present at 50% abundance in each of 30 samples, but would not be surprised if we missed a phylotype at 0.00001% abundance.

Using this model we first analyzed the full-length 16S rRNA dataset. The most abundant 'species'-level phylotype in each sample made up 13% of that sample on average (range: 4.3%-45%), and the most abundant phylotype found across the combined dataset was found in 27 of the 30 fecal microbiotas (Bacteria; Firmicutes; Clostridia; Faecalibacterium). These data are consistent with no phylotype being present at more than 1.1% abundance in all samples.

The deeper pyrosequencing data confirmed this result. In the V6 dataset, using even sampling of 10,000 sequences/sample, the most abundant phylotype in each sample made up 12% of that sample on average (range: 5.0%-37%). The overall most abundant phylotype was found in all 33 samples (Bacteria; Firmicutes; Clostridia; Clostridiales; *Eubacterium rectale*). However, in some samples, this phylotype was present in frequencies as low as 0.01%.

1,000 randomly chosen V2 16S rRNA gene sequences per sample or all V2 sequences were analyzed using the sampling model. The most abundant phylotype in each sample made up 15% of that sample on average (range: 3.8%-47%; 7.6% on average using all sequences, range: 1.6%-26%). The phylotype observed in the most samples was present in 270 of 274 samples at this depth of coverage (Bacteria; Firmicutes; Clostridia; Clostridiales; Ruminococcus). The sampling model indicated that this frequency was consistent with a true abundance of no more than 0.53%.

These results were confirmed, with excellent agreement, by the V6 data: at 1,000 sequences/sample, the maximum abundance OTU is found in 32 of 33 samples, consistent with an abundance of no more than 0.66%. However, at a coverage depth of 10,000 sequences/sample, this OTU is found in all 33 samples but at a minimum observed abundance of 0.01%, consistent with a true abundance of no more than 0.1%. Using all the V6 data without controlling for sampling effort, the minimum observed abundance is consistent with a true abundance of no more than 0.07% (the estimate of the true abundance falls with increased sample size because it is less likely that the low frequency would be observed due to sampling error when more total sequences contribute to the result). Thus, we conclude, with 95% confidence, based on the even sampling used for the other analyses in this study (i.e., 1,000 sequences/sample from V2, 10,000 sequences/sample for V6) that the maximum abundance of any OTU across all samples cannot exceed the V2 result of 0.53%, although the true maximum abundance might be as much as an order of magnitude lower than this based on the greater depth of coverage in the V6 samples.

**Sample Characteristics** - The MOAFTS twin cohort, comprised of female like-sex twin pairs, were identified from Missouri birth records over the period 1994-1999, when the twins had a median age of 15 years. A total of 350 twins from the larger MOAFTS cohort completed screening interviews for the present study. We were able to take advantage of the wave five interview of the MOAFTS twin cohort (which has 90% retention of wave four participants) to identify pairs most likely to meet study criteria. Eligibility was then confirmed at screening interview.

**Supplementary Table 15** summarizes BMI category by ethnicity for the entire MOAFTS wave 5 cohort, based on 3326 twins with complete data on height and weight.

DZ twins had a significantly higher mean BMI than MZ twins [ $25.8 \pm 6.5$  vs.  $24.8 \pm 5.9$ ,  $p < 0.001$ , mean  $\pm$  sd], and a higher prevalence of overweight (22.8 vs 20.9%) and obese (20.7 vs 16.1%;  $\chi^2 = 31.6$ ,  $p < 0.001$ ). This may reflect a higher dizygotic twinning rate among obese women (MZ twinning occurs randomly<sup>35</sup>). BMI was more highly correlated in MZ twins than in DZ twins, both in EA pairs ( $r_{MZ} = 0.80$ ,  $r_{DZ} = 0.48$ ) and in AA pairs ( $r_{MZ} = 0.73$ ,  $r_{DZ} = 0.26$ ), and this remained true when analysis was restricted to pairs concordant for obesity (EA:  $r_{MZ} = 0.61$ ,  $r_{DZ} = 0.27$ ; AA  $r_{MZ} = 0.62$ ,  $r_{DZ} = -0.11$ ) or concordant for leanness (EA:  $r_{MZ} = 0.43$ ,  $r_{DZ} = 0.14$ ; AA:  $r_{MZ} = 0.55$ ,  $r_{DZ} = 0.39$ ). After age-adjustment, quantitative genetic modeling yielded an estimated additive genetic variance for BMI of 68% (95% Confidence Interval [CI]: 57-79%), shared environmental variance of 14% (95% CI: 2-24%), and non-shared environmental variance of 14% (95% CI: 17-21%). Twin pair correlations and heritability estimates are similar to those reported in studies of other twin cohorts of similar age<sup>36</sup>. Data from the Behavioral Risk Factor Surveillance System<sup>37</sup> for Missouri women of comparable age in 2006 yield higher rates of overweight and obesity in EA women (23.8% overweight and 25% obese) compared to rates observed in MOAFTS (19.6% overweight EA, 14.8% obese EA).

Lean and obese women selected for inclusion in the biospecimen collection project were representative of the entire cohort of lean and obese MOAFTS twins in terms of parity (nulliparous/parous), educational attainment (more than high school education/high school education or less) and marital status (married or living with someone as married/not married;  $p > 0.05$  for all comparisons), whether EA or AA. Obese EA and AA women providing biospecimens had a mean BMI at wave 5 of  $36.9 \pm 4.7$  and  $39.8 \pm 7.8$  (mean  $\pm$  sd), respectively, compared with a mean BMI of  $21.4 \pm 1.5$  (EA) and  $21.1 \pm 1.2$  (AA) among lean women. EA twins were selected as being stably lean across all waves

of data (self-reported BMI of 18.5-24.9 kg/m<sup>2</sup>; baseline at median age 15, one-year follow-up, 5-year follow-up and seven year follow-up).

## Supplementary Methods

**Full-length 16S rRNA sequence-based surveys** - Five replicate PCR reactions were performed for each fecal DNA sample. Each 25  $\mu$ l reaction contained 100 ng of gel purified DNA (Qiaquick, Qiagen), 10 mM Tris (pH 8.3), 50 mM KCl, 2 mM MgSO<sub>4</sub>, 0.16  $\mu$ M dNTPs, 0.4  $\mu$ M of the bacteria-specific primer 8F (5'-AGAGTTTGATCCTGGCTCAG-3'), 0.4  $\mu$ M of the universal primer 1391R (5'-GACGGGCGGTGGWTRCA-3'), 0.4 M betaine, and 3 units of Taq polymerase (Invitrogen). Cycling conditions were 94°C for 2 min, followed by 25 cycles of 94°C for 1 min, 55°C for 45 sec, and 72°C for 2 min. Replicate PCRs were pooled and concentrated (Millipore; Montage PCR filter columns). Full-length 16S rRNA gene amplicons (1.3kb) were then gel-purified using the Qiaquick kit (Qiagen), subcloned into TOPO TA pCR4.0 (Invitrogen), and the ligated DNA transformed into *E. coli* TOP10 (Invitrogen). For each sample, 384 colonies containing cloned amplicons were processed for sequencing. Plasmid inserts were sequenced bi-directionally using vector-specific primers plus the internal primer 907R (5'-CCGTCAATTCCTTTRAGTTT-3').

16S rRNA gene sequences were edited and assembled into consensus sequences using the PHRED and PHRAP software packages within the Xplorseq program<sup>6</sup>. Sequences that did not assemble were discarded and bases with PHRED quality scores <20 were trimmed. Sequences were checked for chimeras using Bellerophon version 3 with the default parameters<sup>38</sup>. Alignments for reference genome 16S rRNA gene sequences were manually edited in ARB<sup>39</sup>.

**V2 16S rRNA sequence-based surveys** - Four replicate PCR reactions were performed on the same fecal DNA samples used above. Each 20  $\mu$ l reaction contained 100 ng of gel purified DNA (Qiaquick, Qiagen), 8  $\mu$ l 2.5X HotMaster PCR Mix

(Eppendorf), 0.3  $\mu$ M of a modified primer 8F [5'-GCCTTGCCAGCCCGCTCAG-TCAGAGTTTGATCCTGGCTCAG-3']; composite of 454 primer B (underlined), linker nucleotides (TC), and the universal bacterial primer 8F (italics)], and 0.3  $\mu$ M of a modified primer 338R [5'-GCCTCCCTCGCGCCATCAGNNNNNNNNNNNNNCA-TGCTGCCTCCCGTAGGAGT-3']; 454 Life Sciences primer A (underlined), a unique 12 base barcode<sup>13</sup> (Ns), linker nucleotides (CA), and the broad-range bacterial primer 338R (italics)]. Cycling conditions were 95°C for 2 min, followed by 30 cycles of 95°C for 20 sec, 52°C for 20 sec, and 65°C for 1 min. Replicate PCRs were pooled and amplicons purified using Ampure magnetic purification beads (Agencourt).

PCR products were quantified with the bisbenzimidazole H assay. An aliquot of each PCR product was incubated for 5 min at room temperature in TNE reagent [10 mM Trizma HCl pH 8.1, 100mM NaCl, 1 mM EDTA, and 50 ng/ml freshly prepared bisbenzimidazole H (Sigma)]. Samples were read on a flurometer or plate reader (excitation at 365nm, emission at 460nm) relative to a standard curve constructed using *E. coli* DNA (Sigma). Multiple pools, each containing equimolar amounts of PCR products, were assembled for 454 FLX amplicon pyrosequencing (n=33-100 barcoded<sup>13</sup> samples/pool). Technical replicates were analyzed from selected representatives of each pool across four different sequencing centers; results were highly reproducible, discriminating between individuals and between samples from the same individual over time (**Supplementary Fig. 5**).

**V6 16S rRNA sequence-based surveys** – PCR reactions targeting the V6 region were performed on the same fecal DNA samples used above. Each 32  $\mu$ l reaction contained 100 ng of gel purified DNA (Qiaquick, Qiagen), PCR buffer (PurePeak DNA polymerization mix, Thermo-Fisher), 0.625 mM PurePeak dNTPs (Thermo-Scientific),

0.625  $\mu$ M Fusion Primer A, 0.625  $\mu$ M Fusion Primer B, and 5U Pfu polymerase (Stratagene). The primer set included 5 forward primers (Fusion A) and 4 reverse primers (Fusion B) fused to the 454 Life Sciences adaptors A and B, respectively<sup>40</sup>. Cycling conditions were 94°C for 3 min, followed by 30 cycles of 94°C for 30 sec, 57°C for 45 sec, and 72°C for 1 min, with a final extension period of 72°C for 2 min. PCR products were purified with MinElute columns (Qiagen), and DNA was quantitated using a Bioanalyzer (Agilent) and the PicoGreen assay (Invitrogen). Two pools of PCR products were constructed for 454 FLX amplicon pyrosequencing, composed of 18 and 20 samples, respectively [the second run contained 3 samples from the V2 region and 3 technical replicates; one additional sample (TS30) was sequenced in a third run, bringing the total number of V6 samples processed to 33]. Since technical replicates were highly reproducible (see above), datasets for a given individual's biospecimen were pooled for all subsequent analyses. Any sequences that did not have an exact match to the proximal primer or that contained one or more ambiguous bases were removed as 'low quality'. The proximal primer and any 'fuzzy' matches (identified with BLAST and fuzznuc) to the distal primer were then trimmed from the sequences. Finally, any trimmed sequences shorter than 50 nt were also removed as low-quality<sup>41</sup>.

**Database searches and metabolic reconstructions** - The distributions of taxa, genes, orthologs, metabolic pathways, and high-level gene categories were tallied based on the corresponding annotation of the best-BLAST-hit sequence found in each reference database (BLASTX e-value $<10^{-5}$ , %identity $>50$ , and score $>50$ ). For KEGG analysis, the closest matching gene with an annotation was used, since many genes in the database remain unannotated, including all KEGG orthologous groups (KOs) assigned to genes with an identical e-value (commands -e 0.00001 -m 9 -b 100 were used to run NCBI

BLASTX). Custom Perl scripts were used for all KEGG<sup>17</sup> (v44), STRING<sup>18</sup> (v7), and NCBI NR (v11/24/07) analyses. Selected genes from the recently sequenced reference genomes were manually annotated using NCBI-BLASTP searches against the KEGG, STRING, and NCBI NR database. The 44 reference genome database includes predicted proteins from draft or complete assemblies of *Alistipes putredinis* DSM17216, *Bacteroides* WH2, *Bacteroides thetaiotaomicron* 3731, *Bacteroides thetaiotaomicron* 7330, *Bacteroides thetaiotaomicron* VPI5482, *Bacteroides fragilis* NCTC9343/YCH46, *Bacteroides caccae* ATCC43185, *Parabacteroides distasonis* ATCC8503, *Bacteroides ovatus* ATCC8483, *Bacteroides stercoris* ATCC43183, *Bacteroides uniformis* ATCC8492, *Bacteroides vulgatus* ATCC8482, *Parabacteroides merdae* ATCC43184, *Anaerostipes caccae* DSM14662, *Anaerotruncus colihominis* DSM17241, *Anaerofustis stercorihominis* DSM17244, *Bacteroides capillosus* ATCC29799, *Clostridium bartlettii* DSM16795, *Clostridium bolteae* ATCCBAA-613, *Coprococcus eutactus* ATCC27759, *Clostridium leptum* DSM753, *Clostridium ramosum* DSM1402, *Clostridium scindens* ATCC35704, *Clostridium* sp. L2-50, *Clostridium spiroforme* DSM1552, *Dorea longicatena* DSM13814, *Eubacterium dolichum* DSM3991, *Eubacterium eligens* ATCC27750, *Eubacterium rectale* ATCC33656, *Eubacterium siraeum* DSM15702, *Eubacterium ventriosum* ATCC27560, *Faecalibacterium prausnitzii* M212, *Peptostreptococcus micros* ATCC33270, *Ruminococcus gnavus* ATCC29149, *Ruminococcus obeum* ATCC29174, *Ruminococcus torques* ATCC27756, *Collinsella aerofaciens* ATCC25986, *Bifidobacterium adolescentis*, *Bifidobacterium longum* DJO10A/NCC2705, *Escherichia coli* K12, *Methanobrevibacter smithii* ATCC35061, and *Methanobrevibacter stadmanae* DSM3091 (see <http://genome.wustl.edu/pub/> and NCBI GenBank). Draft assemblies of *Clostridium* sp. SS2-1 and *Clostridium symbiosum*



*ATCC14940* were also used for functional clustering and diversity analyses (<http://genome.wustl.edu/pub/>). Coverage plots (percent identity plots) were generated using nucmer and mummerplot (part of the MUMmer v3.19 package), and default parameters<sup>42</sup>. Full-length 16S sequences were obtained for each reference genome, likelihood parameters were determined using Modeltest<sup>43</sup>, and a maximum-likelihood tree was generated using PAUP<sup>44</sup>.

We validated our annotations with simulated datasets (**Supplementary Fig. 11**). To do so, the frequency of annotated genes from the KEGG database<sup>17</sup> (v44) was first tallied across the aggregate human gut microbiomes (n=18 datasets). The 1,000 most frequent microbial genes were then used to generate ‘simulated reads’ between 50 and 500 nt long. The simulated reads were subsequently annotated (BLASTX against the KEGG database), with self-hits excluded. As shown previously<sup>45</sup>, this analysis revealed a low rate of false positives (i.e. high precision), but using very short sequences (e.g. 50-100 nt) increased the rate of false negatives (lower sensitivity) (**Supplementary Fig. 11**). Given the increased read-length of our libraries relative to 454 GS20 pyrosequencing data<sup>3,22,45</sup>, simulated reads with an average length comparable to our data (200-250 nt), demonstrated robust assignments with an e-value<10<sup>-5</sup>, %identity>50, and/or bit-score>50. Using all three cutoffs, sequences 200 nt in length returned 81.5% of the correct assignments, with a precision of 0.93 and sensitivity of 0.88, similar to what was observed by re-annotating the original full-length gene sequences after ignoring self-hits. The KEGG cutoff criteria were also applied to BLASTX analysis results for STRING-based predictions<sup>18</sup>, given the similar size of the databases.

ABI 3730xl capillary sequencing reads from 9 previously published adult human gut microbiomes were obtained from the NCBI TraceArchive<sup>20,21</sup>. The full dataset from

each sample was annotated by BLASTX comparisons against the KEGG<sup>17</sup> and STRING<sup>18</sup> database (see above; BLASTX e-value<10<sup>-5</sup>, %identity>50, and score>50). To allow quantitative comparisons between these datasets and our pyrosequencing data, we first extracted all forward sequencing reads and then generated one ‘simulated pyrosequencer read’ from each longer capillary read. Nucleotides spanning positions 100 to 322 were used from all capillary reads of suitable length, to avoid low quality regions that commonly occur at the beginning and end of the reads. These simulated reads were then annotated as described above.

16S rRNA gene fragments were identified in each microbiome through BLASTN searches of the RDP database<sup>46</sup> (version 9.33; e-value<10<sup>-5</sup>; Bit-score>50; %identity>50; alignment length≥100). Putative 16S rRNA gene fragments were then aligned using the NAST multi-aligner<sup>47</sup> with a minimum template length of 100 bases and minimum identity of 75%. Taxonomy was assessed after insertion into an ARB neighbor-joining tree<sup>39</sup>.

Microbiomes were clustered based on their profiles after normalizing across all sampled communities (z-score), using the Pearson’s correlation distance metric, followed by single-linkage hierarchical clustering in addition to Principal Components Analysis<sup>19</sup> (Cluster3.0). Results were visualized using the Treeview Java applet<sup>48</sup>. Functional diversity (Shannon index and evenness) was calculated using the number of assignments in each microbiome to each of the 254 pathways present in the KEGG database<sup>17</sup> (EstimateS 8.0; ref. 49). The maximum possible index is the natural log of the total number of pathways: ln(254) or 5.54. Shannon evenness was calculated by dividing the Shannon index for a given microbiome by the maximum possible index (scale of 0 to 1, with 1 representing a microbiome with all pathways found at an equal abundance)<sup>22</sup>.

Results were compared to simulated metagenomic reads generated from the 36 recently sequenced reference human gut-derived Bacteroidetes and Firmicutes genomes (<http://genome.wustl.edu/pub/organism/>). Reads were produced by ReadsIm v0.10 (ref. 50), using the following options: -n 10000 -modlr normal -meanlr 223 -stdlr 0.3. The mean and standard deviation for length of the simulated reads was based on the observed read-length distribution of the 18 fecal microbiome datasets (**Supplementary Table 5**).

## Supplementary References

35. Bulmer, M.G. *The Biology of Twinning in Man* (Clarendon, Oxford, 1970).
36. Schousboe, K. *et al.* Sex differences in heritability of BMI: a comparative study of results from twin studies in eight countries. *Twin Research* **6**, 409-421 (2003).
37. Centers for Disease Control and Prevention (CDC). *Behavioral Risk Factor Surveillance System Survey Data*. Atlanta, Georgia: U.S. Department of Health and Human Services, Centers for Disease Control and Prevention, 2006.
38. Huber, T., Faulkner, G., and Hugenholtz, P. Bellerophon: a program to detect chimeric sequences in multiple sequence alignments. *Bioinformatics* **20**, 2317-2319 (2004).
39. Ludwig, W. *et al.* ARB: a software environment for sequence data. *Nucleic Acids Res.* **32**, 1363-1371 (2004).
40. Huber, J.A. *et al.* Microbial population structures in the deep marine biosphere. *Science* **318**, 97-100 (2007).
41. Huse, S.M., Huber, J.A., Morrison, H.G., Sogin, M.L., and Welch, D.M. Accuracy and quality of massively parallel DNA pyrosequencing. *Genome Biol.* **8**, R143 (2007).
42. Kurtz, S., *et al.* Versatile and open software for comparing large genomes. *Genome Biology* **5**, R12 (2004).
43. Posada, D., and Crandall, K.A. Modeltest: testing the model of DNA substitution. *Bioinformatics* **14**, 817-818 (1998).
44. Swofford, D.L. (2003). PAUP\*. Phylogenetic Analysis Using Parsimony (\* and Other Methods). Version 4 (Sunderland, Massachusetts: Sinauer Associates).

45. Mou, X., Sun, S., Edwards, R.A., Hodson, R.E., and Moran, M.A. Bacterial carbon processing by generalist species in the coastal ocean. *Nature* **451**, 708-711 (2008).
46. Cole, J.R., *et al.* The Ribosomal Database Project (RDP-II): sequences and tools for high-throughput rRNA analysis. *Nucleic Acids Res.* **33**, D294-296 (2005).
47. DeSantis, T.Z., *et al.* NAST: a multiple sequence alignment server for comparative analysis of 16S rRNA genes. *Nucleic Acids Res.* **34**, W394-399 (2006).
48. Saldanha, A.J. Java Treeview-extensible visualization of microarray data. *Bioinformatics* **20**, 3246-3248 (2004).
49. Colwell, R.K. EstimateS: Statistical estimation of species richness and shared species from samples. Version 7.5. User's Guide and application published at: <http://purl.oclc.org/estimates> (2005).
50. Schmid, R., Schuster, S.C., Steel, M.A., and Huson, D.H. ReadSim- A simulator for Sanger and 454 sequencing, software freely available from [www-ab.informatik.uni-tuebingen.de/software/readsim](http://www.ab.informatik.uni-tuebingen.de/software/readsim).

## Supplementary Figures

**Figure 1. 16S rRNA gene surveys reveal evidence for familial aggregation and reduced diversity in the obese gut microbiome. (A,B)** Average unweighted UniFrac distance (a measure of differences in bacterial community structure) between related and unrelated individuals. 10,000 sequences were randomly sampled from each V6 dataset (Panel A) and 200 sequences were randomly sampled from each full-length dataset (Panel B), OTUs were chosen, a UniFrac tree was built from representative sequences, and random permutations were done on the resulting UniFrac distance matrix. Asterisks indicate significant differences between related and unrelated individuals [Student's t-test with Monte Carlo (1,000 permutations); \* $p < 0.001$ ]. **(C,D)** Phylogenetic diversity curves for the obese and lean gut microbiome. 1 to 1,000 sequences were randomly sampled from each V2 dataset (Panel C) and 1 to 200 sequences were randomly sampled from each full-length dataset (Panel D), and the average branch length leading to the sampled sequences was calculated. **(E,F)** Rarefaction curves for the obese and lean fecal microbiota. 1 to 10,000 sequences were randomly sampled from each V6 dataset (Panel E), and 1 to 200 sequences were randomly sampled from each full-length dataset (Panel F). The average number of OTUs in each sample was then calculated (mean $\pm$ 95%CI shown).

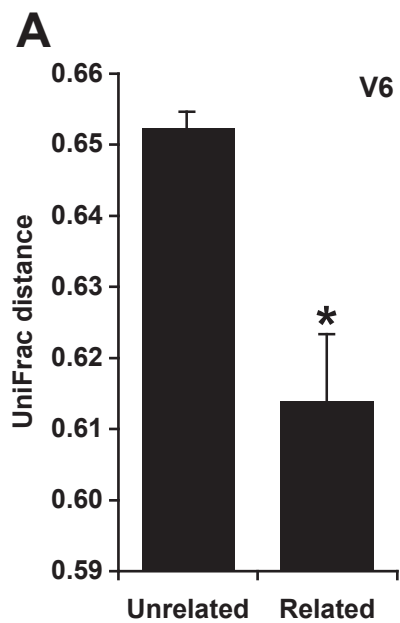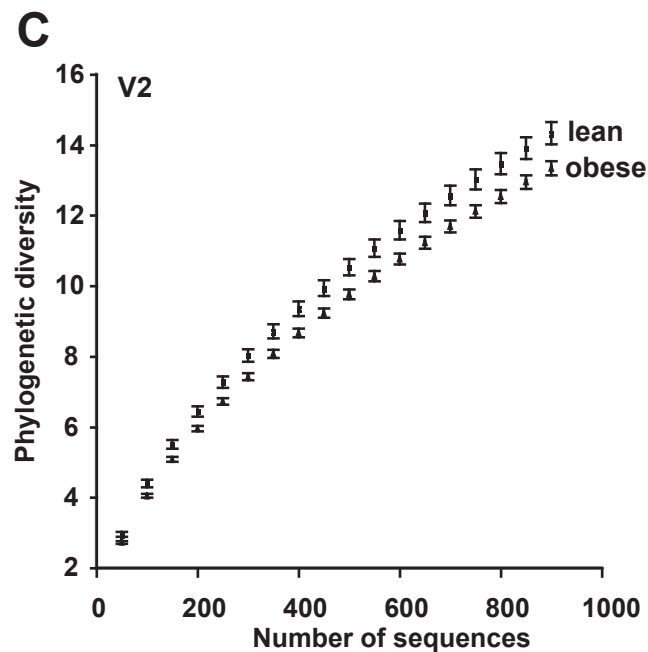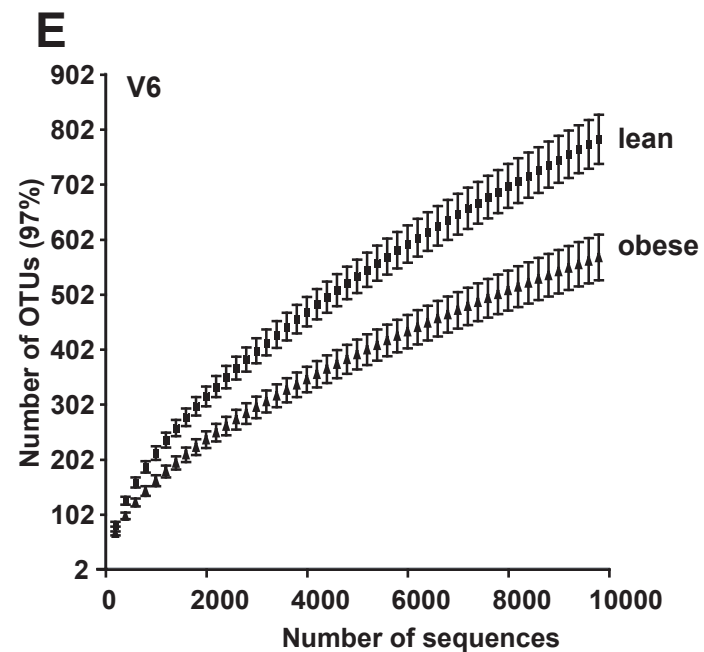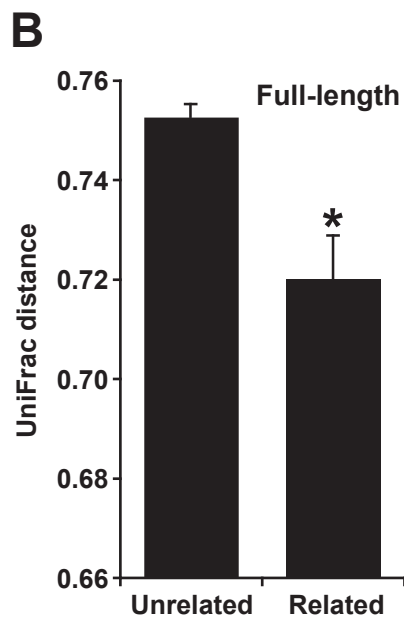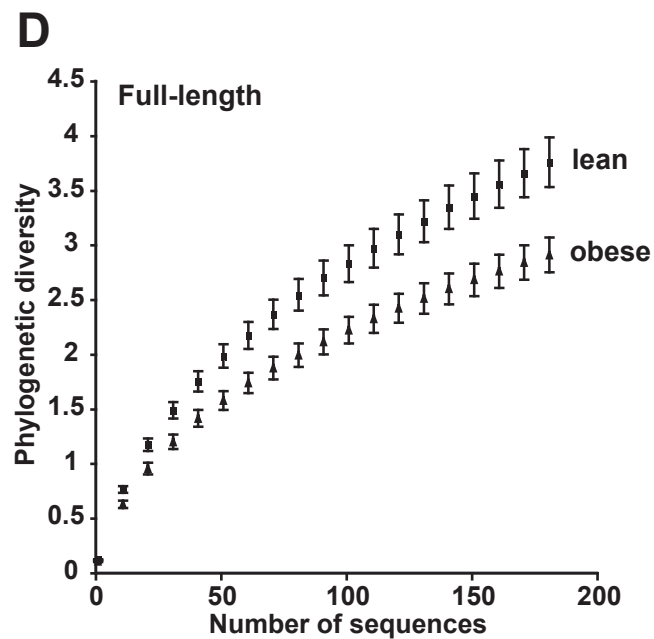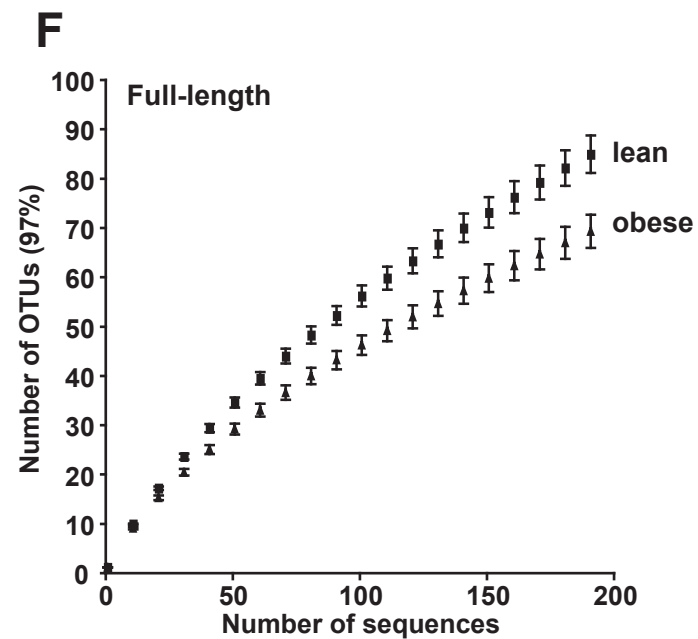



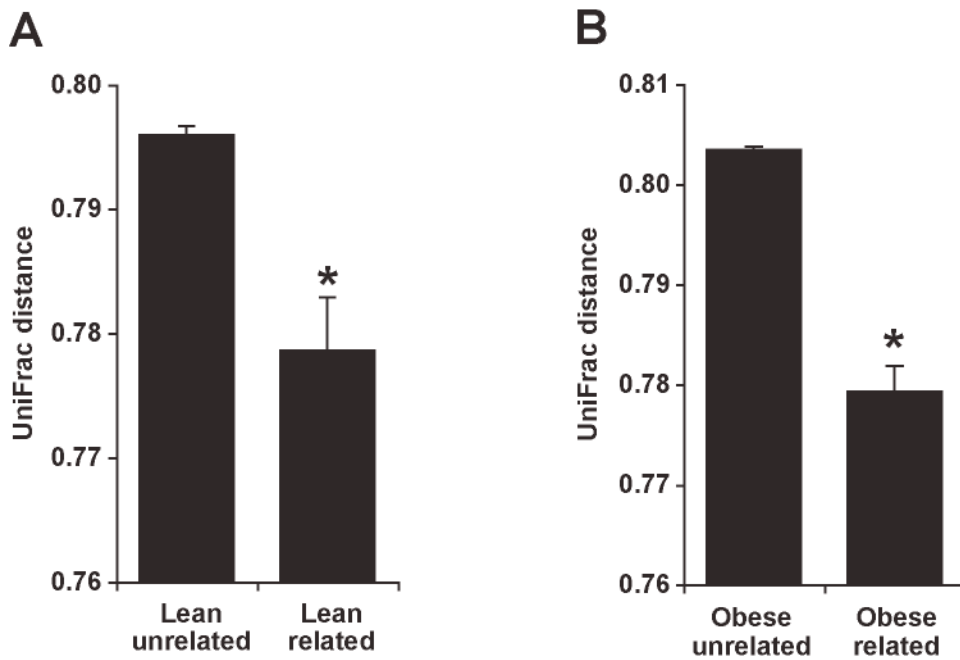

**Figure 2. Stratification of related and unrelated individuals concordant for physiological states of obesity versus leanness confirms familial similarity. (A,B)**

Average UniFrac distance between related and unrelated individuals concordant for leanness (Panel A) or obesity (Panel B). Briefly, 1,000 sequences were randomly sampled from each V2 dataset, OTUs were chosen, a UniFrac tree was built from representative sequences, and random permutations were done on the resulting UniFrac distance matrix. Asterisks indicate significant differences between related and unrelated individuals [Student's t-test with Monte Carlo (1,000 permutations); \* $p < 10^{-5}$ ].

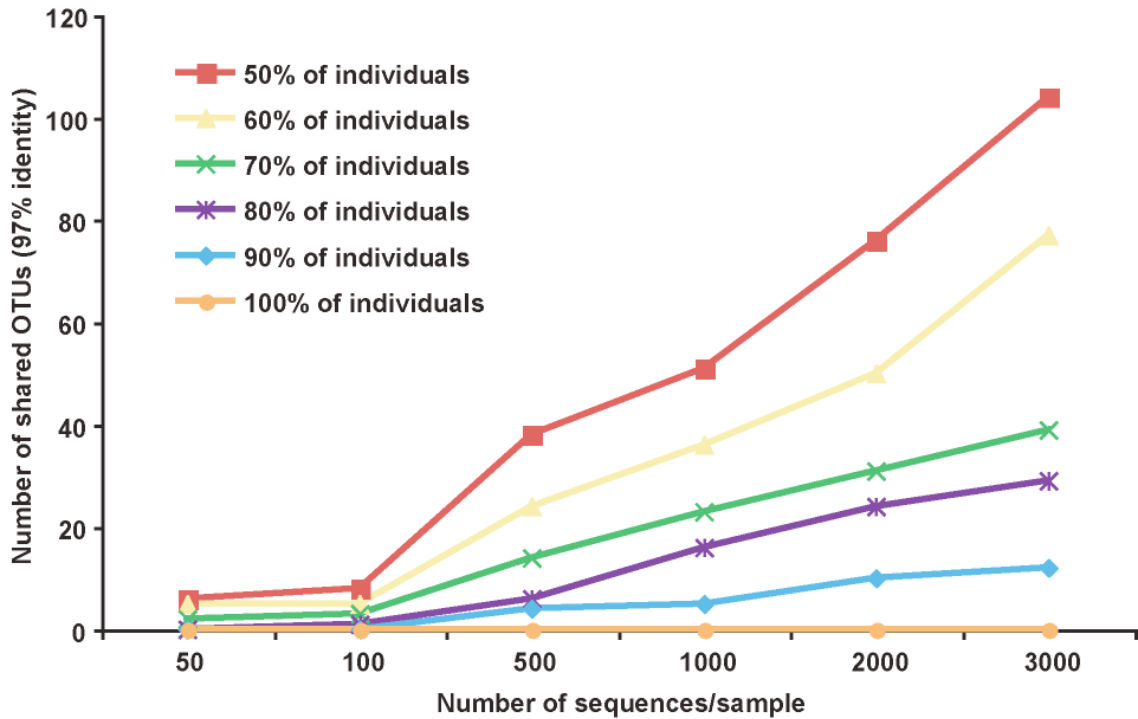

**Figure 3. The number of shared phylotypes (OTUs) as a function of the number of sequences per sample.** 50-3,000 sequences were randomly selected from each sample, obtained from 93 different individuals. All sequences were binned into ‘species’-level phylotypes using a 97% identity threshold. Less stringent parameters were used for OTU binning at all levels of coverage to allow for analysis of 3,000 sequences per sample (density cutoff=0.65, maximum of 3000 nodes).

**Figure 4. Clustering of the fecal microbiotas of twins and their mothers sampled at the beginning of the study and two months later.** Unweighted UniFrac-based clustering. Colored boxes link samples from the same individual (also indicated by identical IDs followed by the number 1 or 2). 34 of the individuals were only sampled once. 1,000 randomly V2 16S rRNA gene sequences were analyzed per sample.

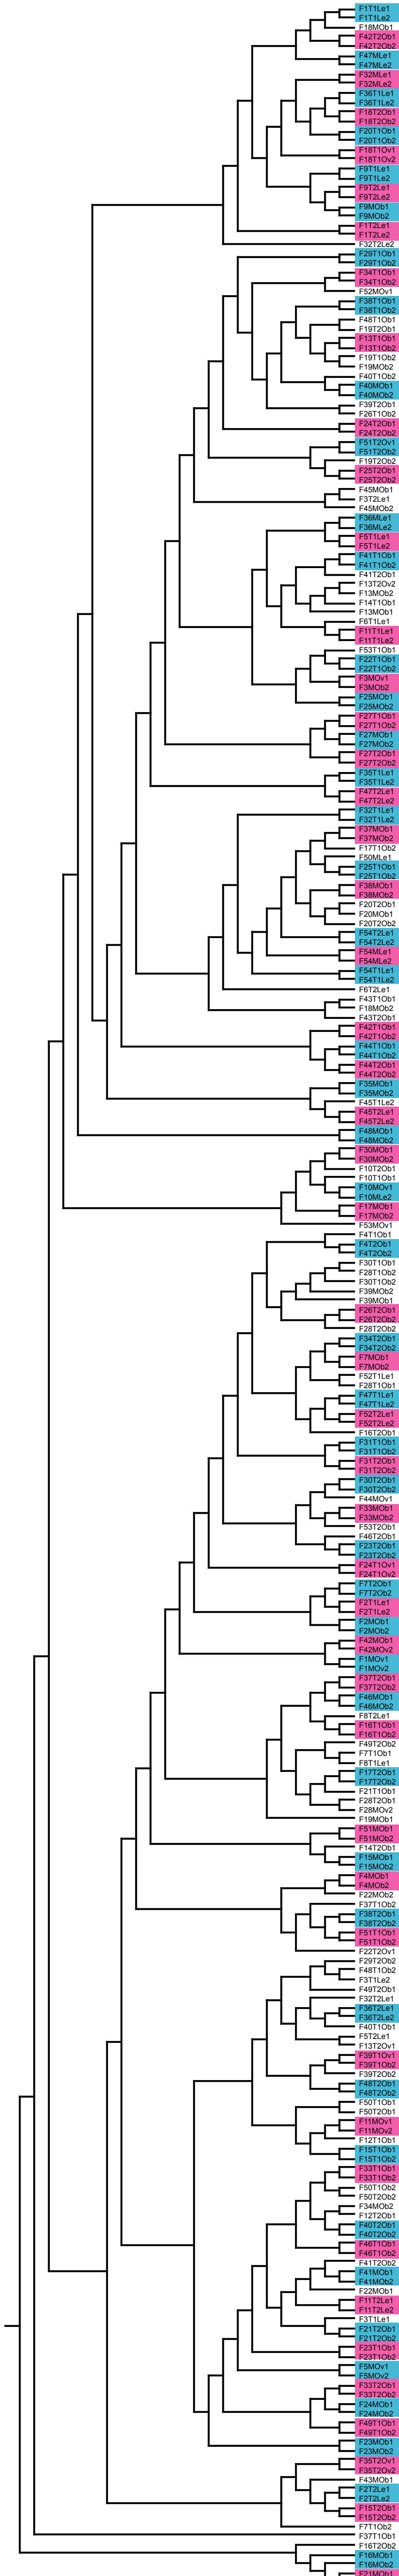

**Figure 5. Technical replicates analyzed at four different sequencing centers cluster together.** Fecal DNA samples were split and sequenced separately at four different sequencing centers. Abbreviations: usc, Environmental Genomics Core Facility, University of South Carolina; ok, Advanced Center for Genome Technology, University of Oklahoma, ct; 454 Life Sciences Branford, CT; and ma, Josephine Bay Paul Center, Marine Biological Laboratory, Woods Hole Massachusetts. Unweighted UniFrac-based clustering was performed on the combined dataset. Colored boxes enclose samples from the same individual (also indicated by identical IDs followed by the number 1 or 2). The location of the sequencing facility follows each sample ID. Randomly selected sequences were analyzed ( $\leq 500$  per replicate).



**Figure 6. Relative abundance of the major gut bacterial phyla across 127 gut samples obtained at two different timepoints.** Fecal samples were collected at the initial and second timepoints (on average  $57 \pm 4$  days between collections). The relative abundance of the major gut bacterial phyla is based on analysis of V2 16S rRNA gene sequences. Samples are organized based on the rank order abundance of Firmicutes in the initial timepoint.

Initial timepoint

Second timepoint

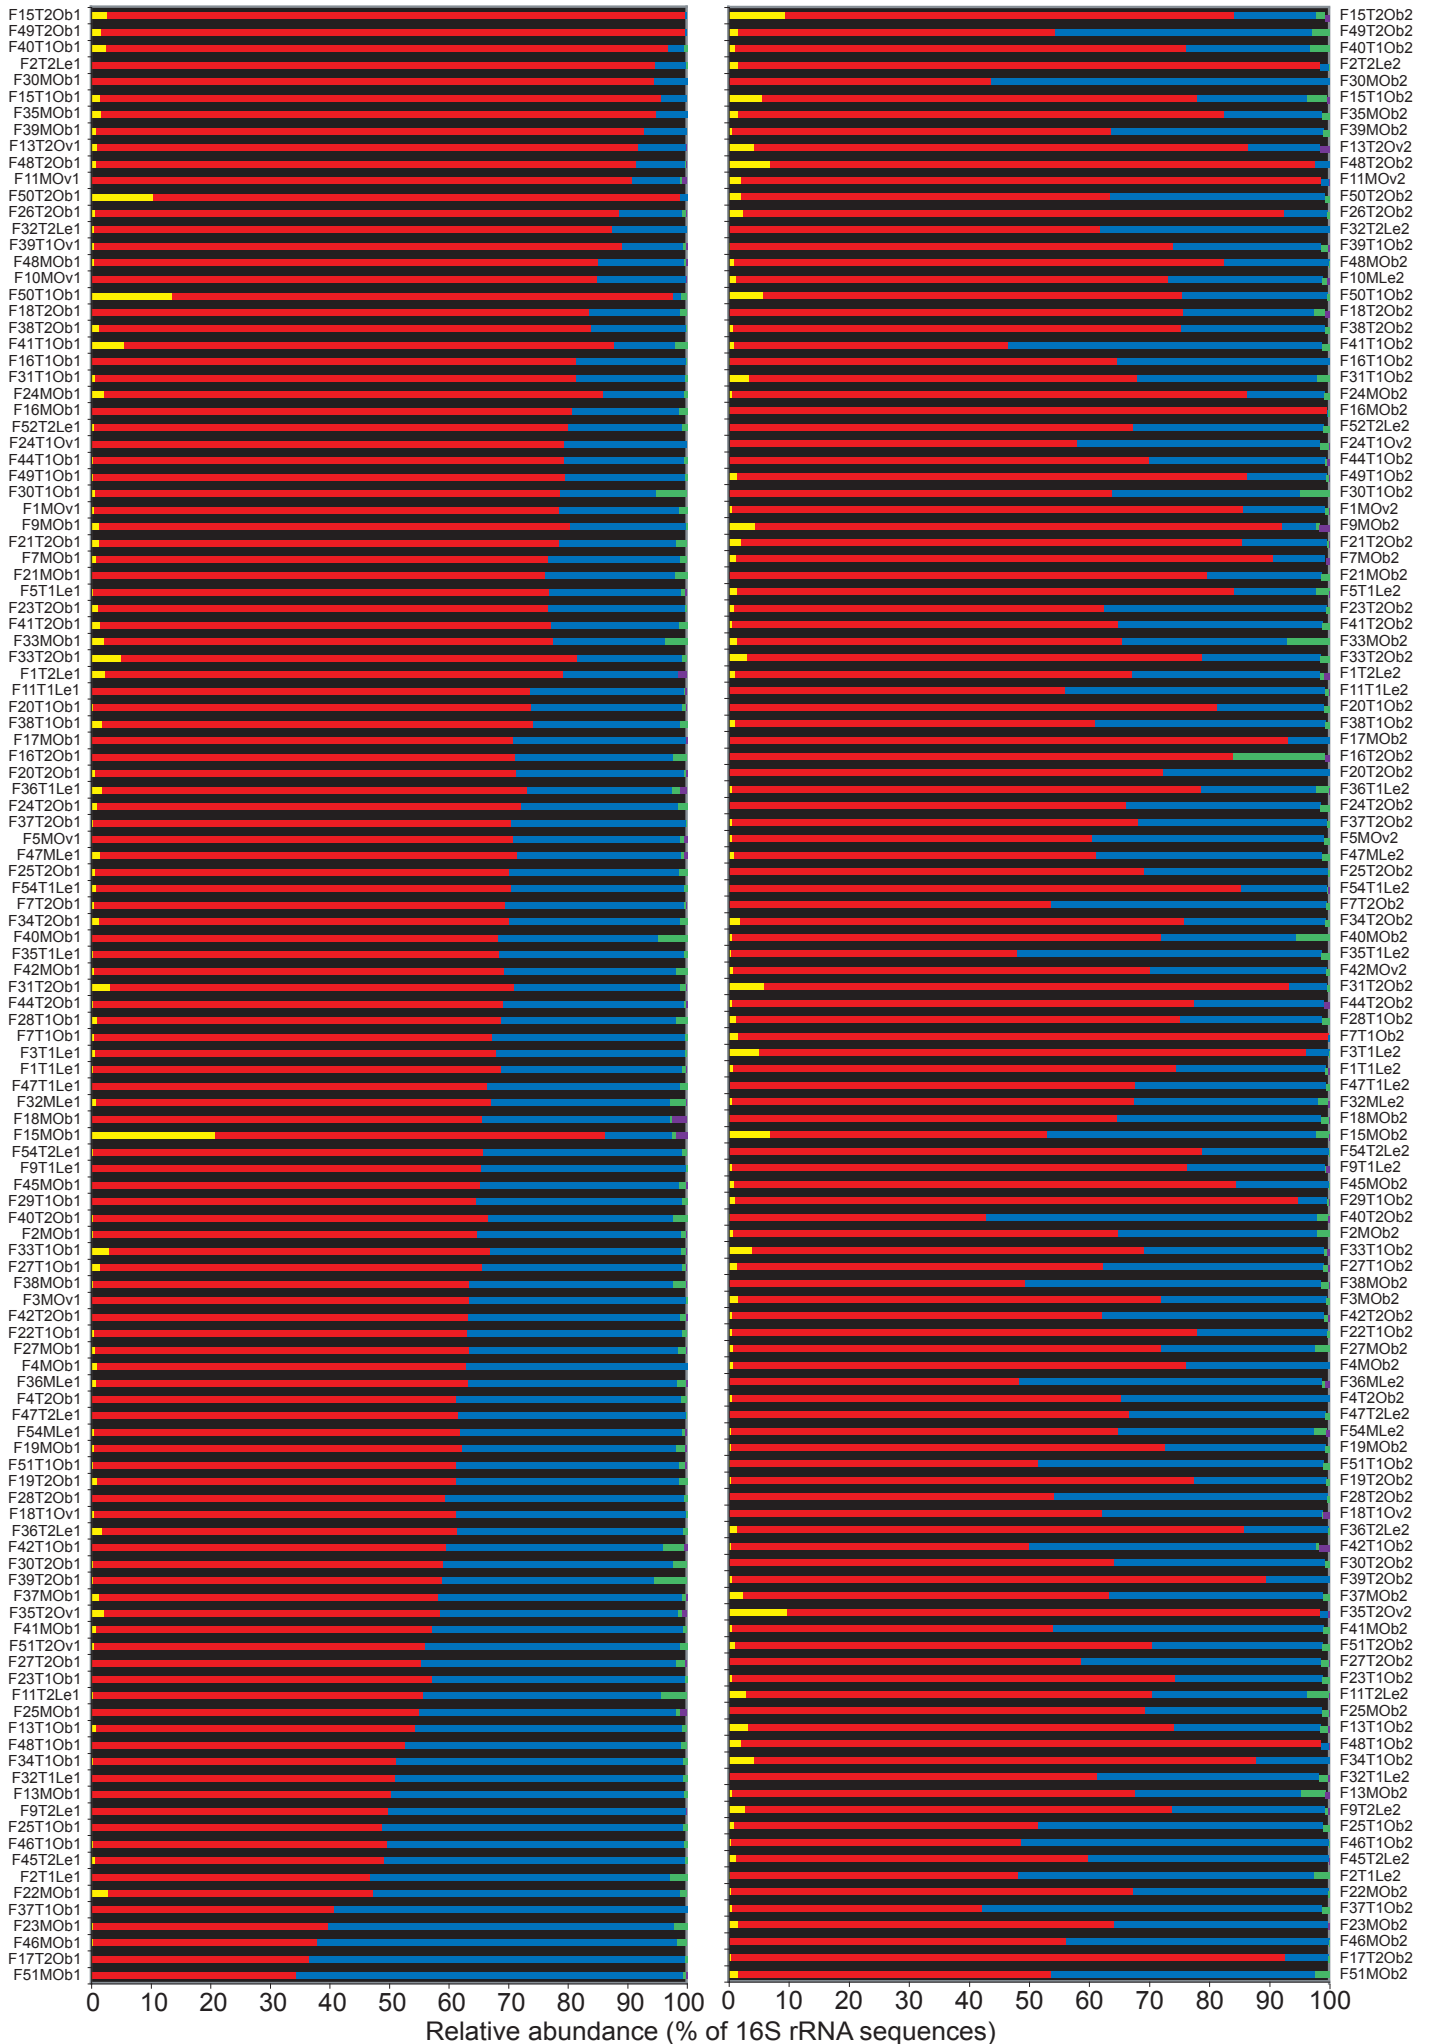



**Figure 7. Taxonomic profiles of microbial gene content in the human gut (fecal) microbiome.** Branches and distributions are colored by phylum: Bacteroidetes (red), Firmicutes (blue), and Actinobacteria (green). Proteobacteria (*E.coli*) and Archaea (*M.smithii* and *M.stadtmanae*) are uncolored. The relative abundance of sequences homologous to each genome is depicted on a scale of 0 to 30% (BLASTX comparisons of microbiome datasets to reference genomes).

lean twin-pairs and mothers

obese twin-pairs and mothers

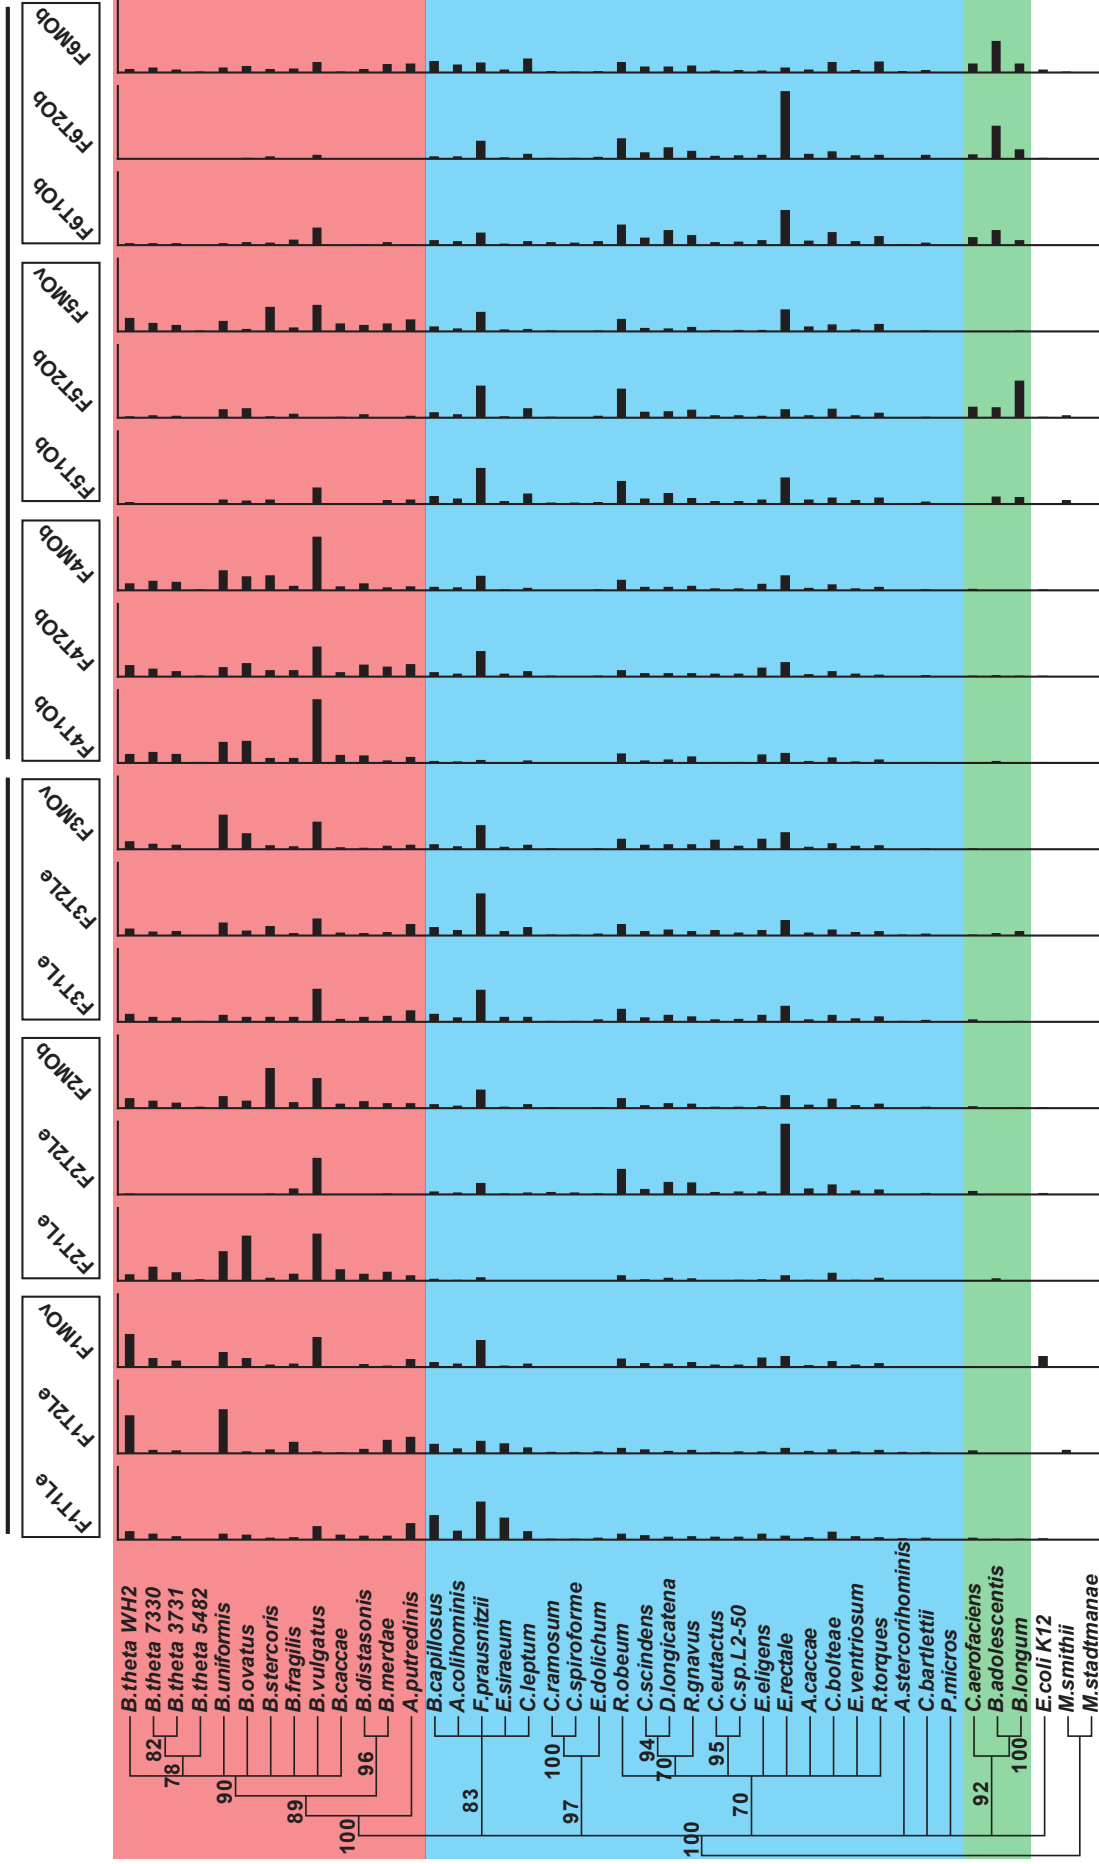

30% relative abundance

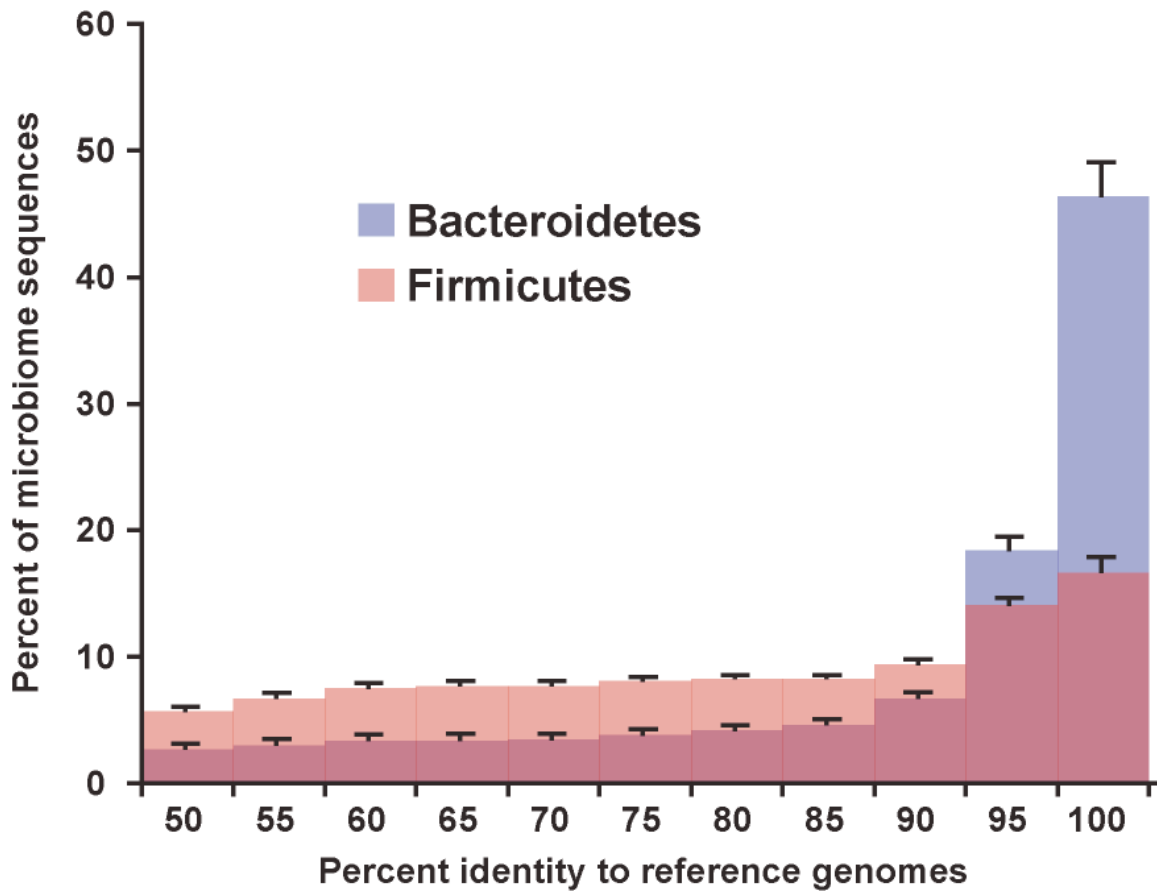

**Figure 8. Assignment of fecal microbiome reads to sequenced reference human gut-derived Bacteroidetes and Firmicutes genomes.** Histogram of the percent identity (mean±SEM) obtained from sequence alignments between gut microbiome reads (n=18 datasets) and Firmicutes or Bacteroidetes reference genomes.

**Figure 9. Percent identity plots of the fecal microbiomes versus reference genomes.**

Each row (x-axis) represents a different genome. The y-axis shows the percent identity to microbiome sequences (red dots). The combined data from lean/overweight individuals are in the left column while the combined data from obese individuals is displayed in the right column. Supercontigs were used for draft genomes; the assembly version (v) can be found after the strain name. The lines found at 10% identity on each plot depict the sum of all sequences mapped across each genome.

## Lean/Overweight

## Obese

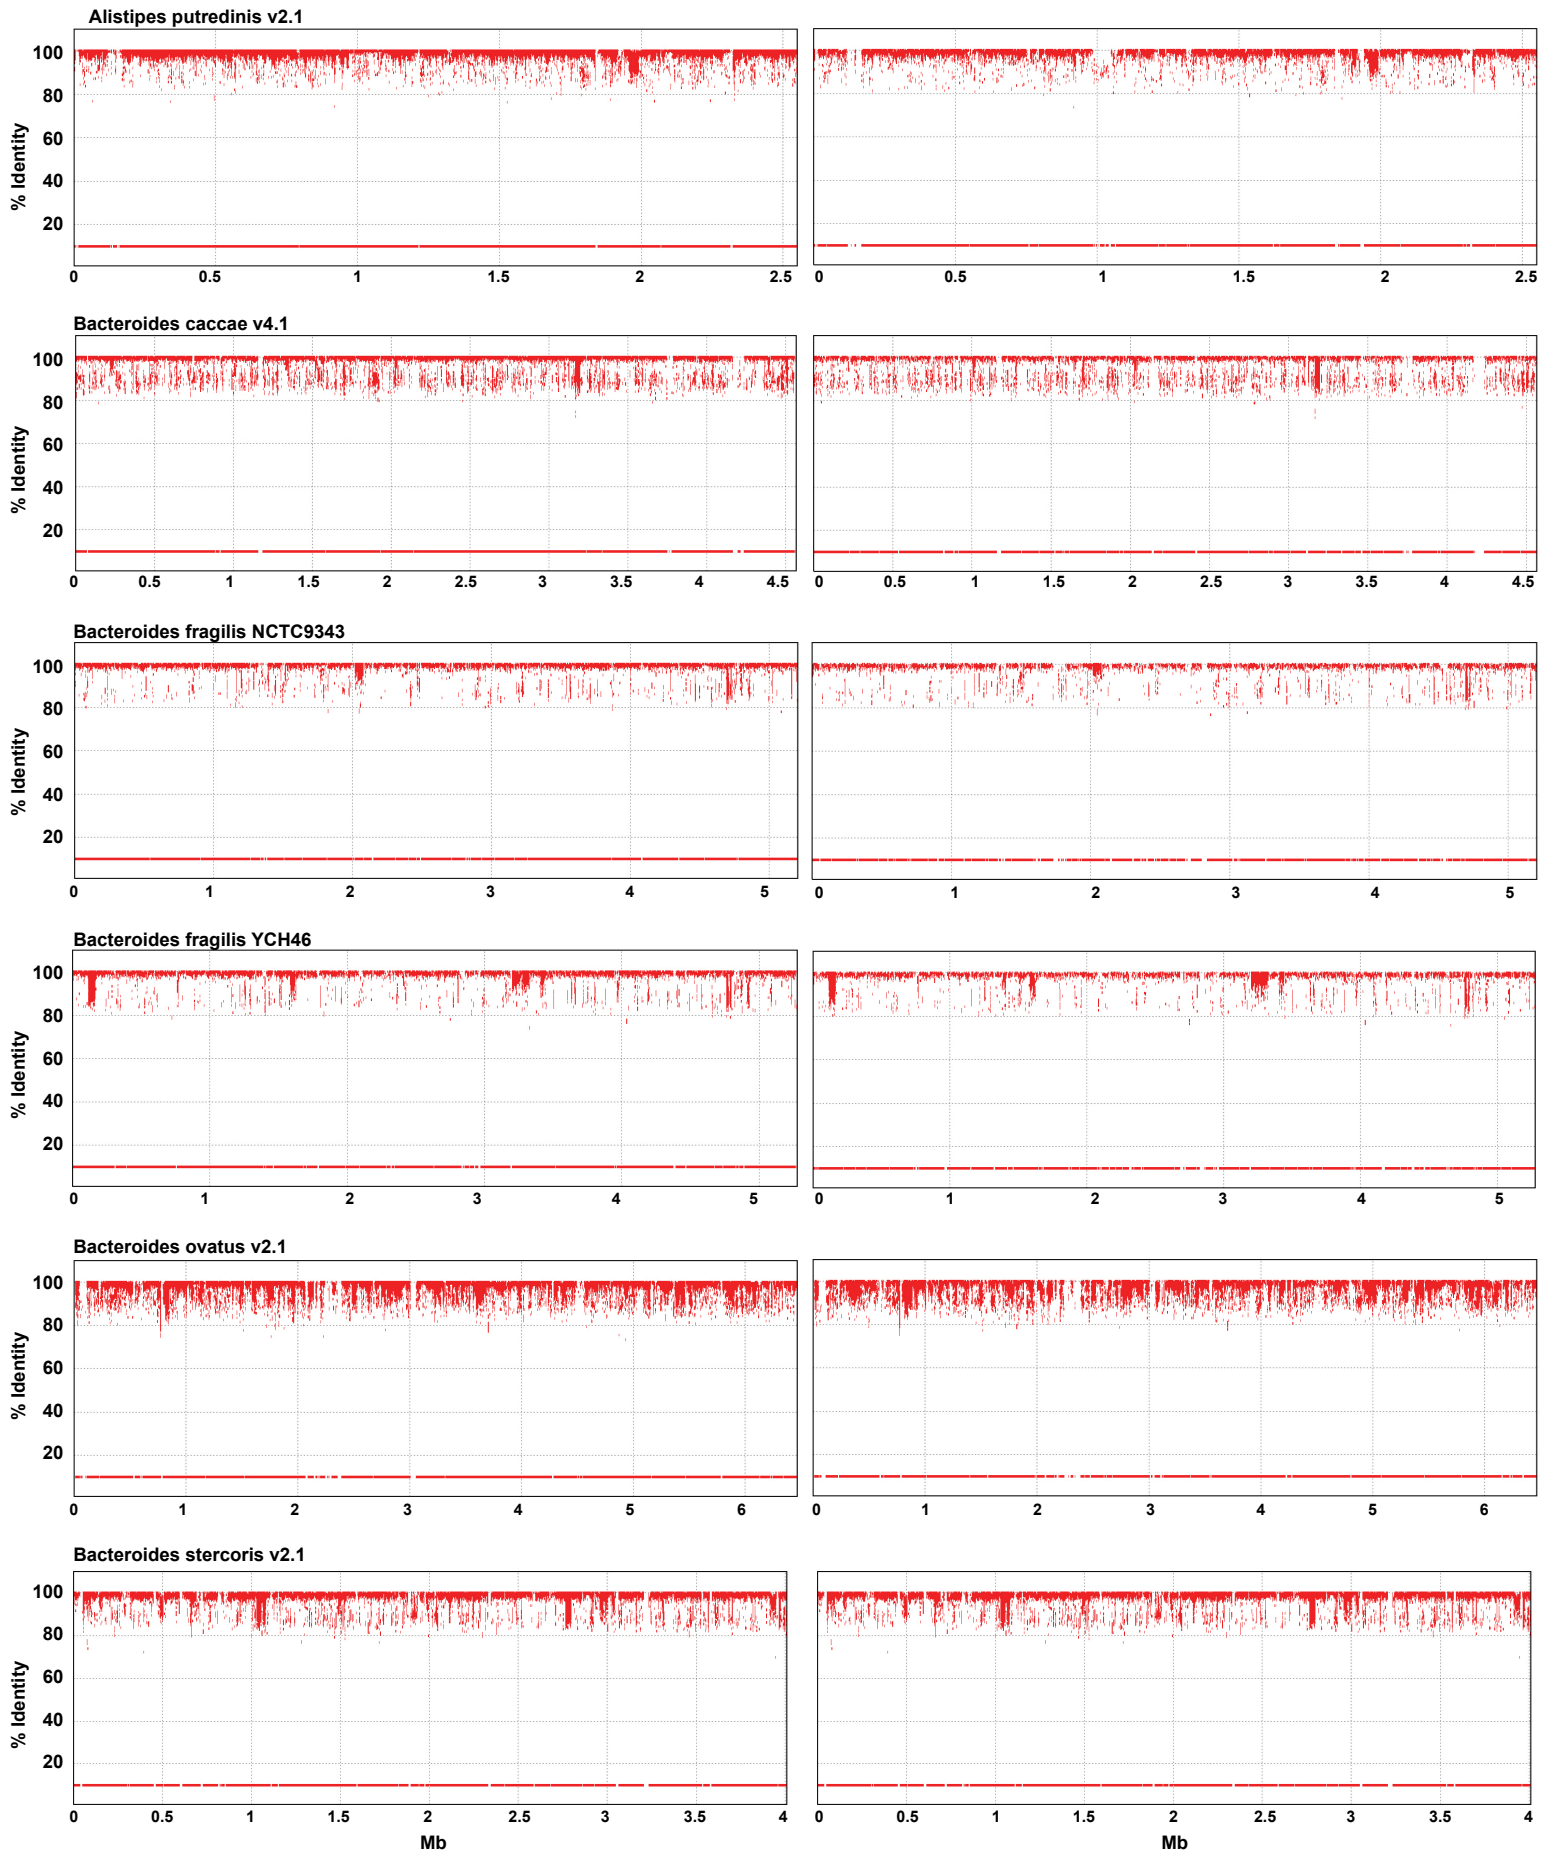

## Lean/Overweight

## Obese

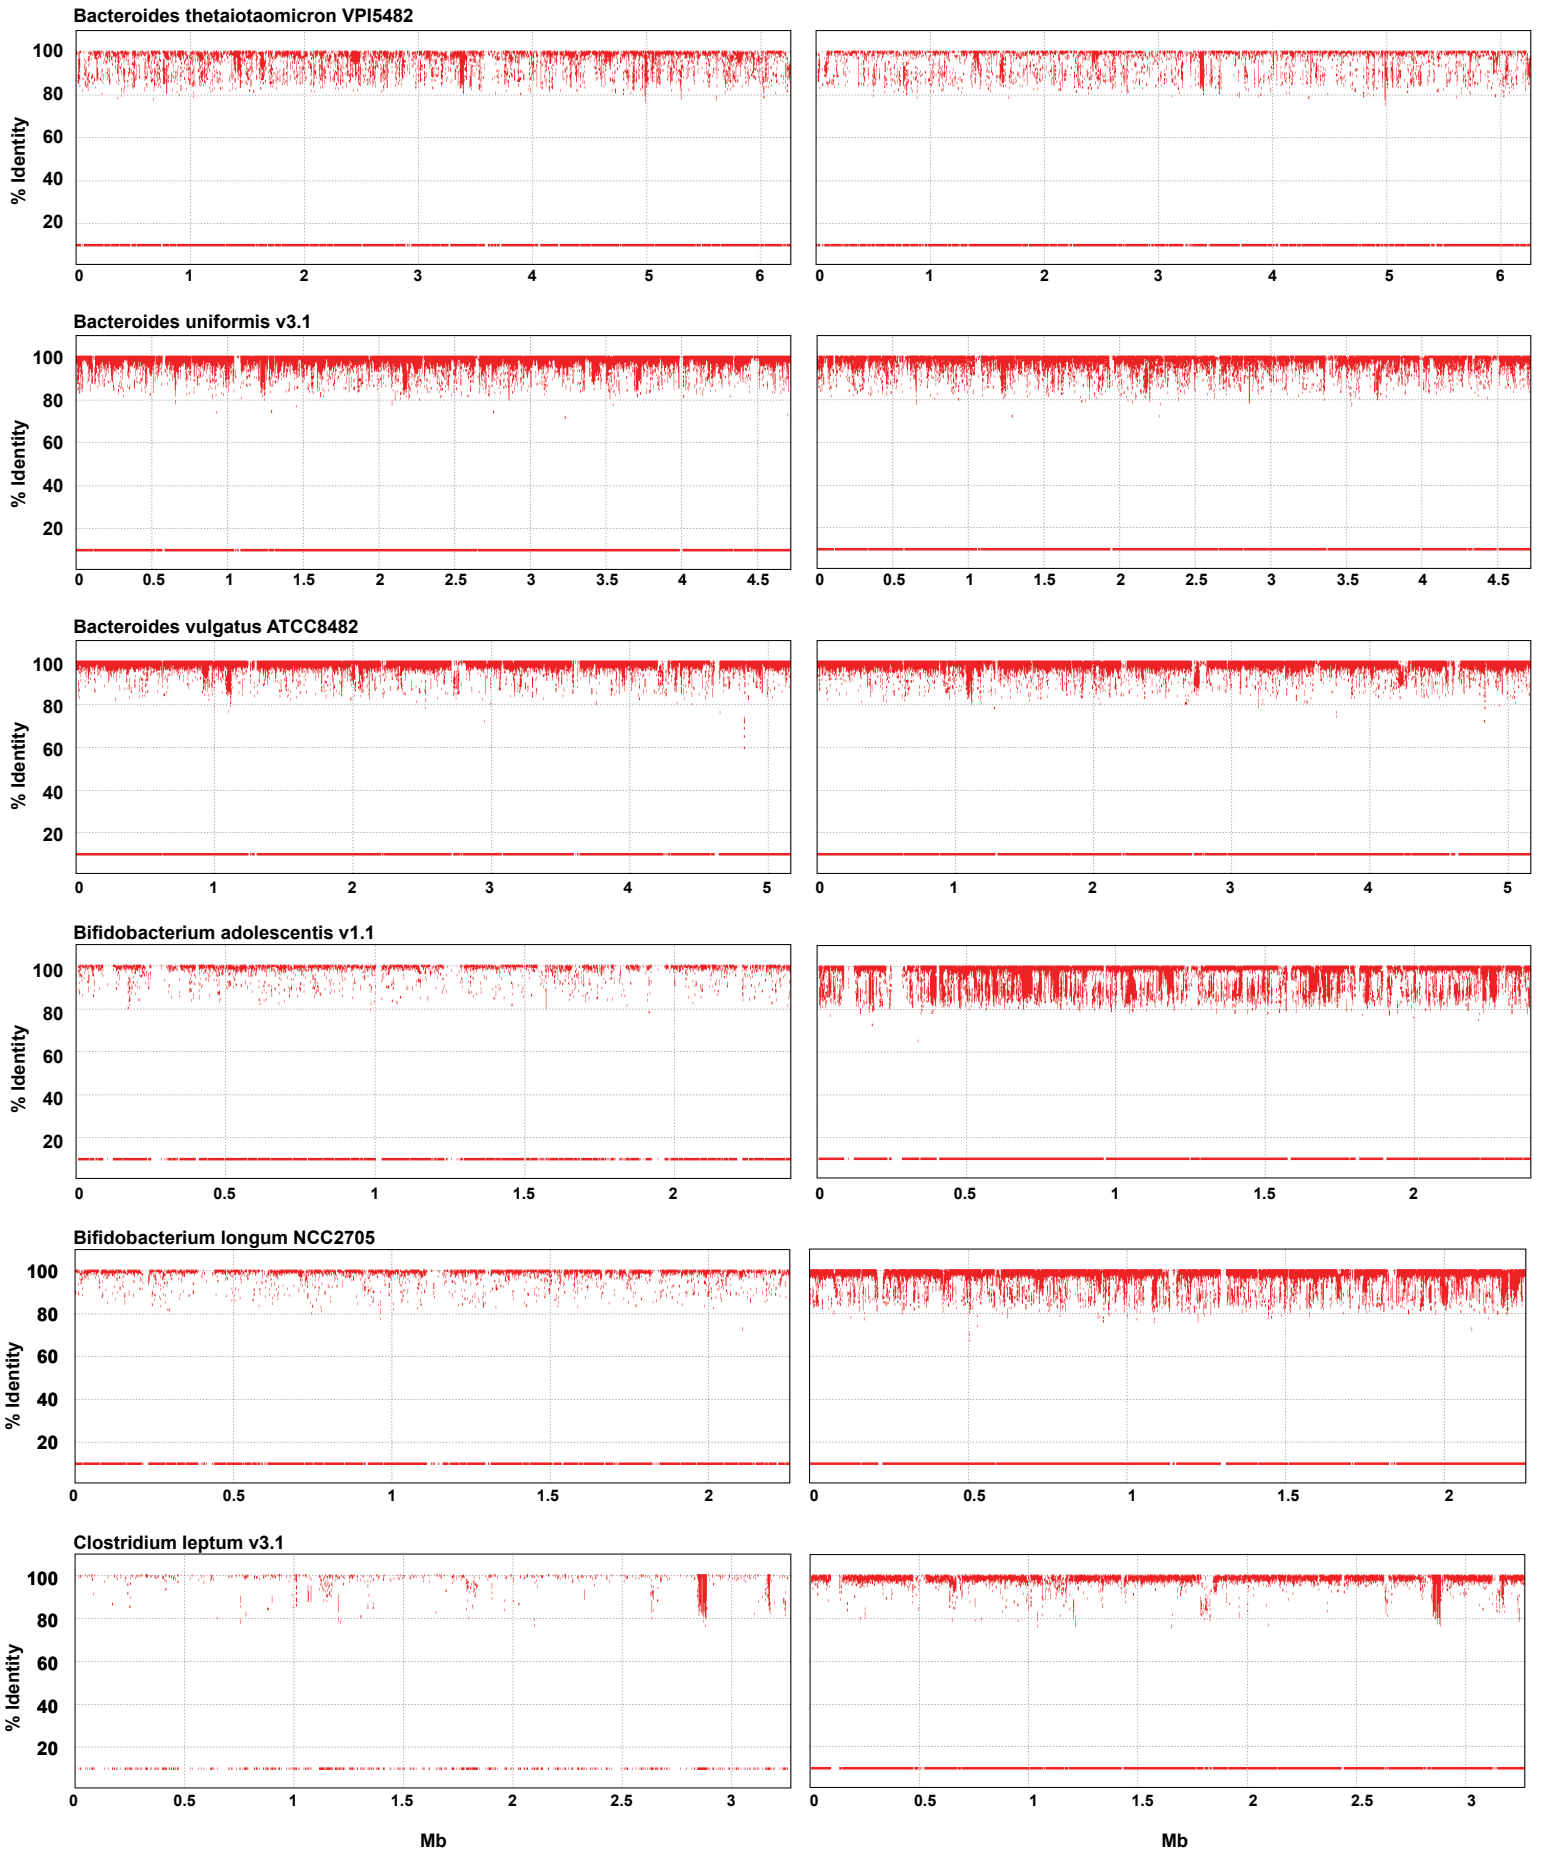

## Lean/Overweight

## Obese

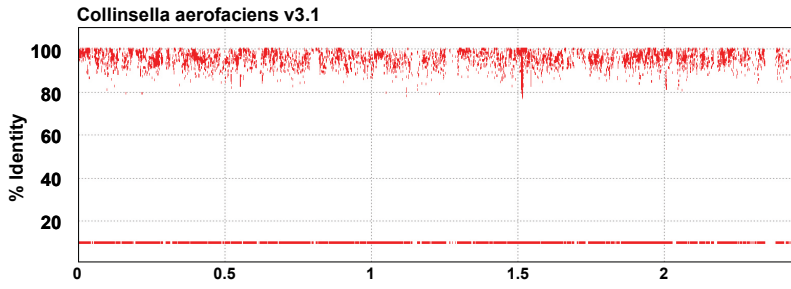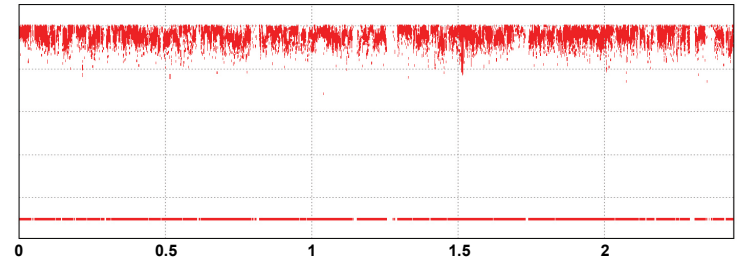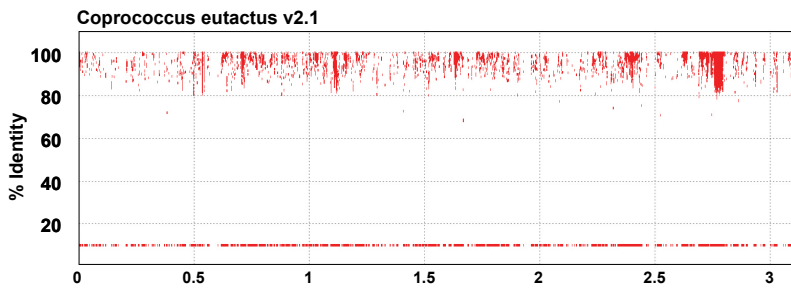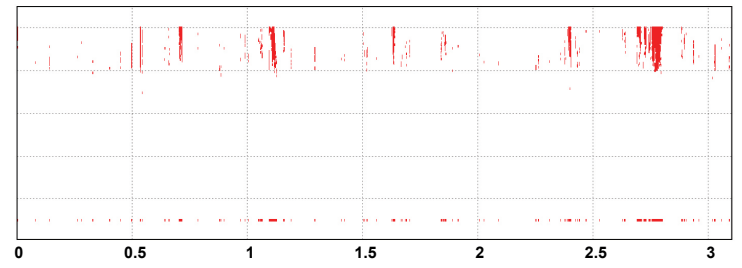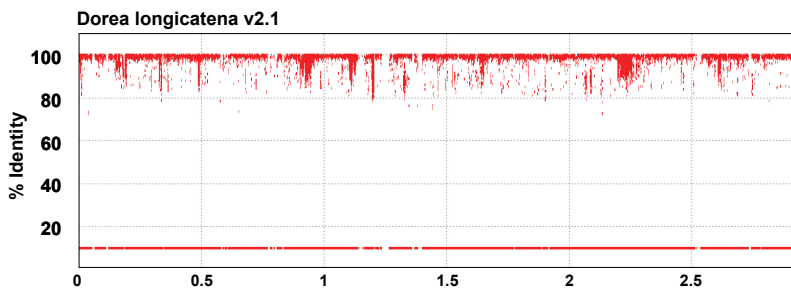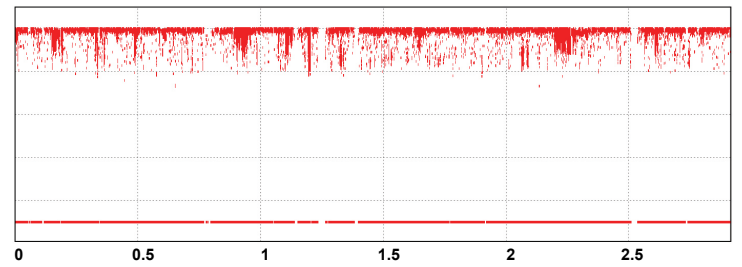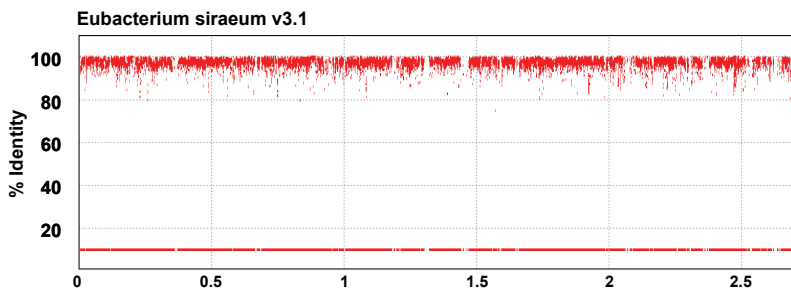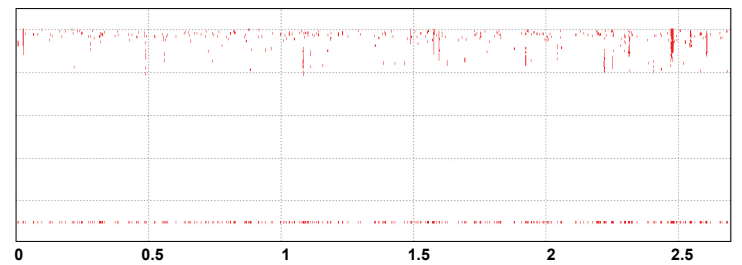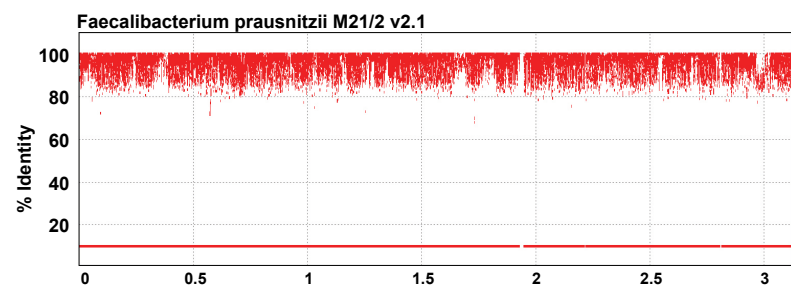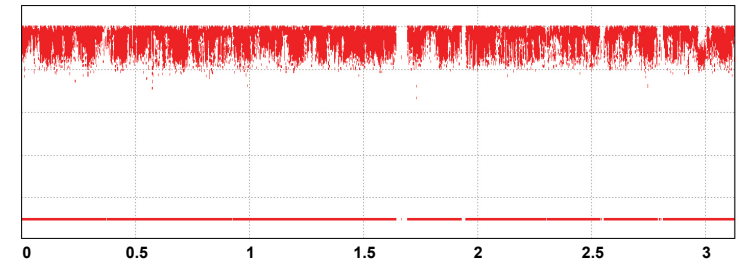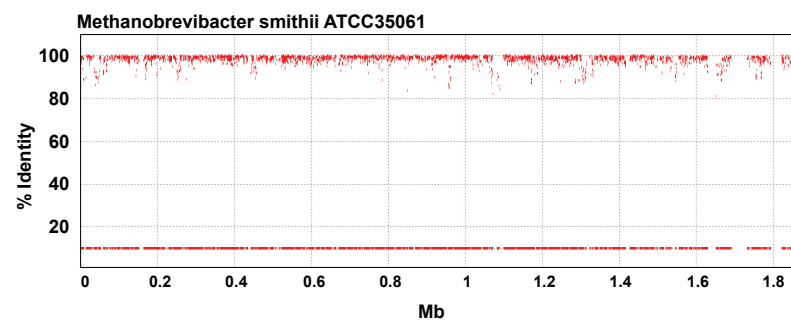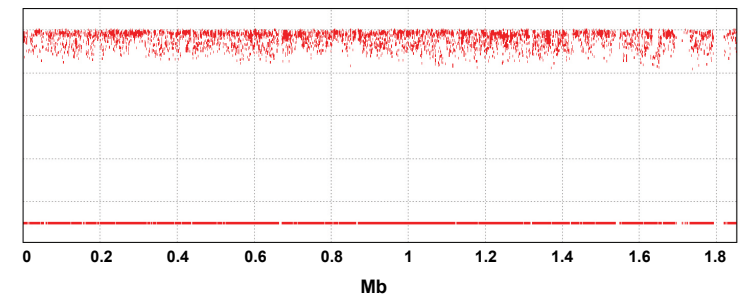



## Lean/Overweight

## Obese

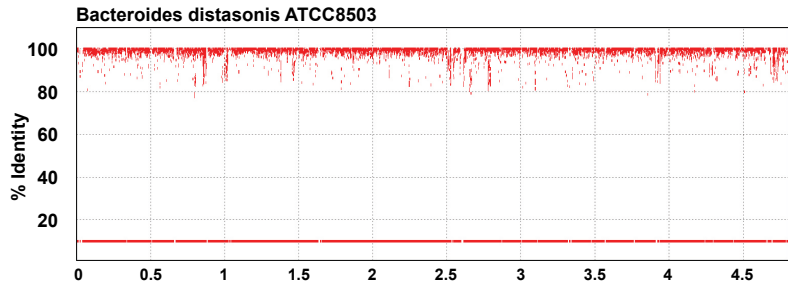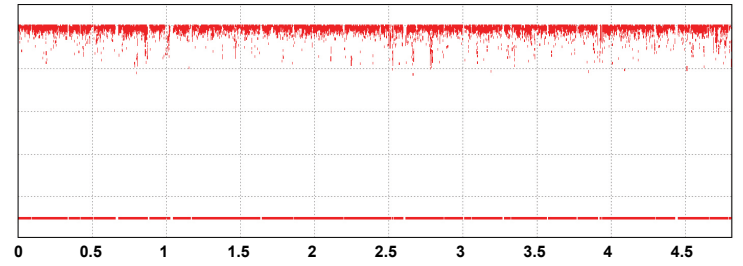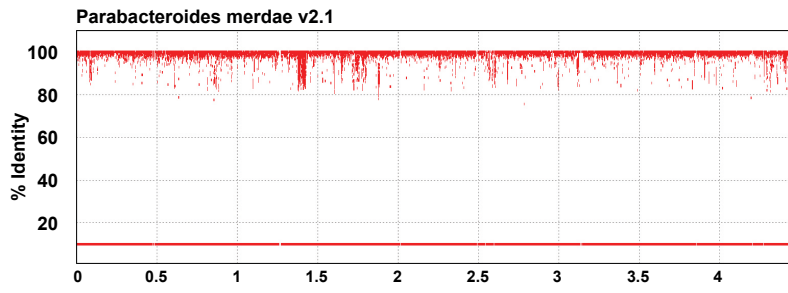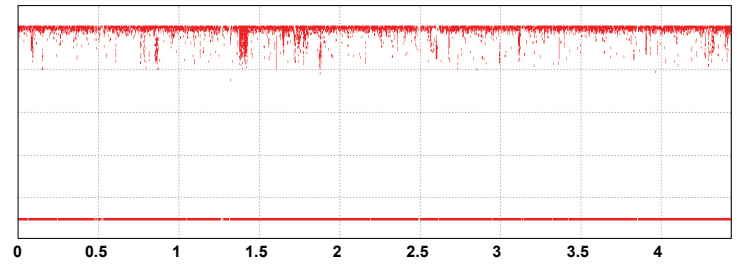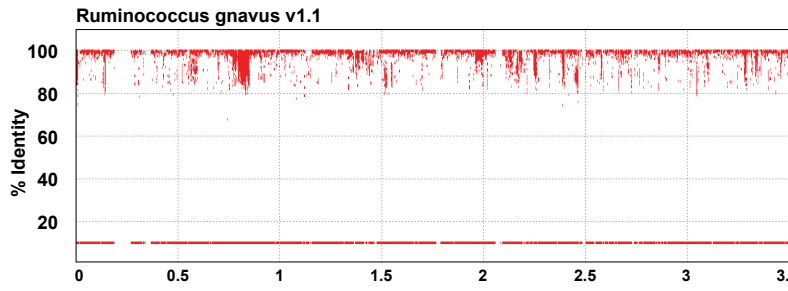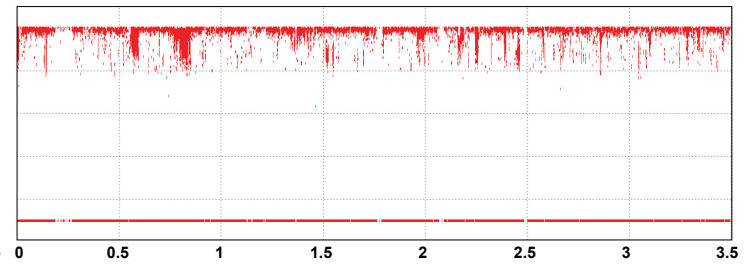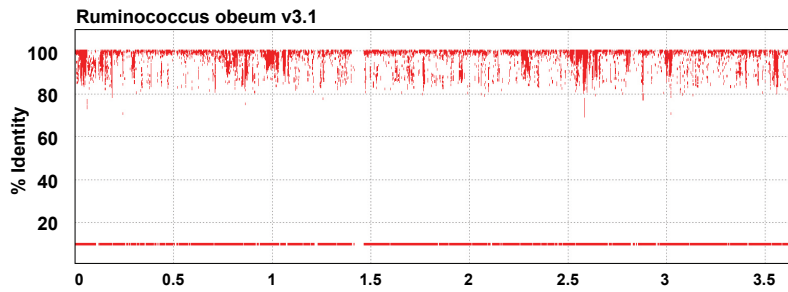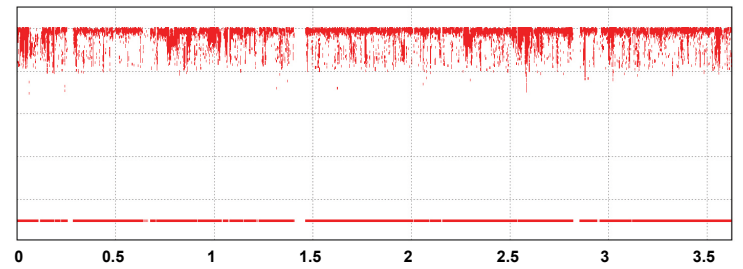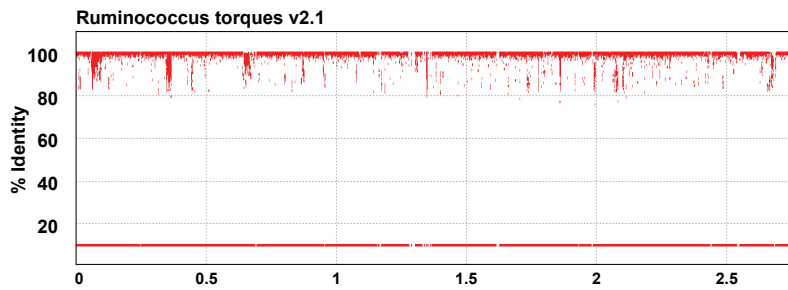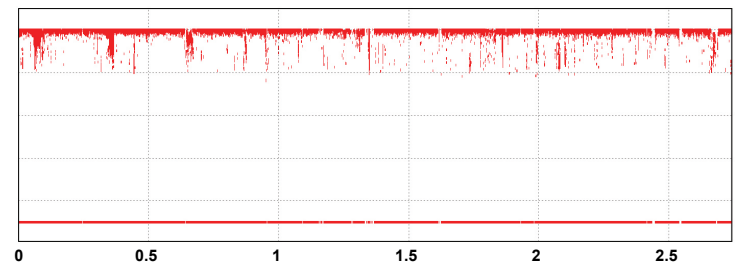

Mb

Mb



**Figure 10. Relative abundance of bacterial phyla in 18 human gut microbiomes.** (A-C) PCR-based 16S rRNA gene sequences [(A) full-length, (B) V2 region, and (C) V6]. (D-E) Microbiome data analyzed by BLAST comparisons [(D) NCBI non-redundant database and (E) a custom 44 gut genome database]. (F) Analysis of 16S rRNA gene fragments identified in each microbiome. (G) Correlation matrix based on all pairwise comparisons ( $R^2$ ) of the relative abundance of the four major phyla (Actinobacteria, Firmicutes, Bacteroidetes, and Proteobacteria) across all six methods.

**A** PCR-based 16S rRNA gene sequences

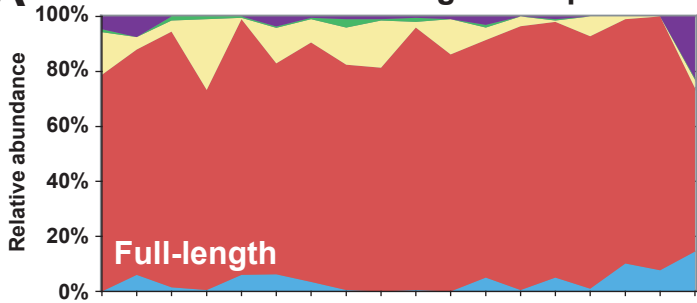

**D** Microbiome sequences

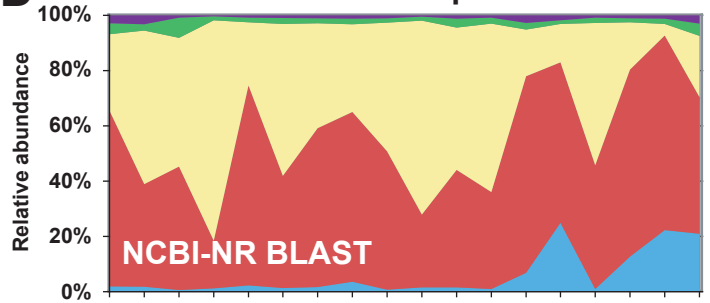

**B**

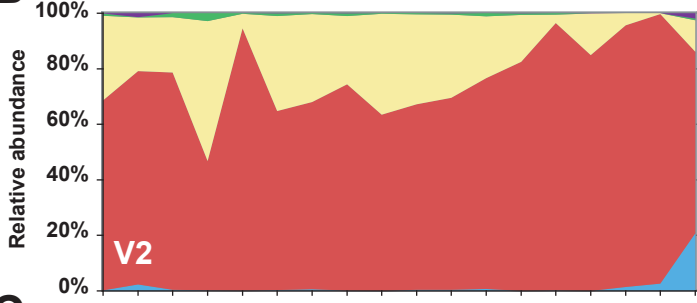

**E**

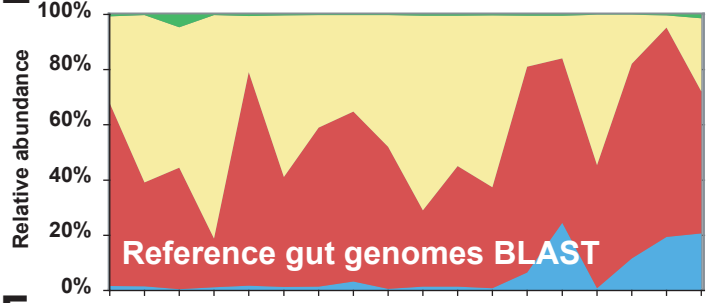

**C**

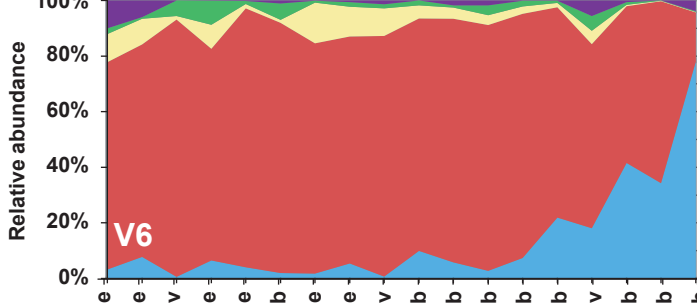

**F**

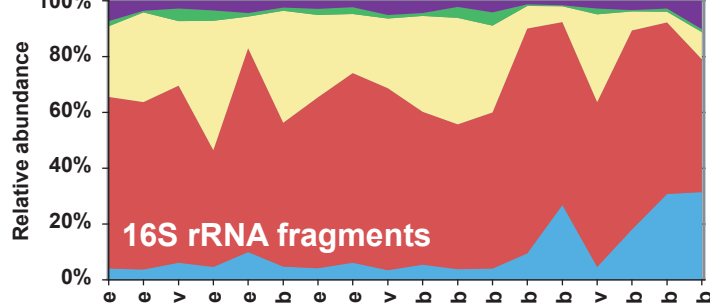

Firmicutes    Bacteroidetes    Actinobacteria    Proteobacteria    Other

**G**

|                       | Full-length | V2  | V6  | NCBI-NR | Gut genomes | 16S rRNA fragments |
|-----------------------|-------------|-----|-----|---------|-------------|--------------------|
| Full-length           | 0.9         | 0.9 | 0.9 | 0.9     | 0.9         | 0.9                |
| V2                    | 0.9         | 0.9 | 0.9 | 0.9     | 0.9         | 0.9                |
| V6                    | 0.9         | 0.9 | 0.9 | 0.9     | 0.9         | 0.9                |
| NCBI-NR               | 0.9         | 0.9 | 0.9 | 0.9     | 0.9         | 0.9                |
| Reference gut genomes | 0.9         | 0.9 | 0.9 | 0.9     | 0.9         | 0.9                |
| 16S rRNA fragments    | 0.9         | 0.9 | 0.9 | 0.9     | 0.9         | 0.9                |

R<sup>2</sup> value: <0.6   0.6   0.8   0.9

**Figure 11. Validation of annotation parameters using control datasets.** (A-C) Percent of randomly fragmented annotated genes (KEGG v44) assigned to the correct KEGG orthologous group as a function of the (A) e-value, (B) % identity, or (C) bit-score cutoff used. (D-F) Sensitivity [true positives (TP) divided by true positives plus false negatives (FN)] as a function of the (D) e-value, (E) % identity, or (F) bit-score cutoff used. (G-I) Precision [true positives divided by true positives plus false positives (FP)] as a function of the (G) e-value, (H) % identity, or (I) bit-score cutoff used. The vertical gray line and circle indicates the cutoff values used in this analysis.

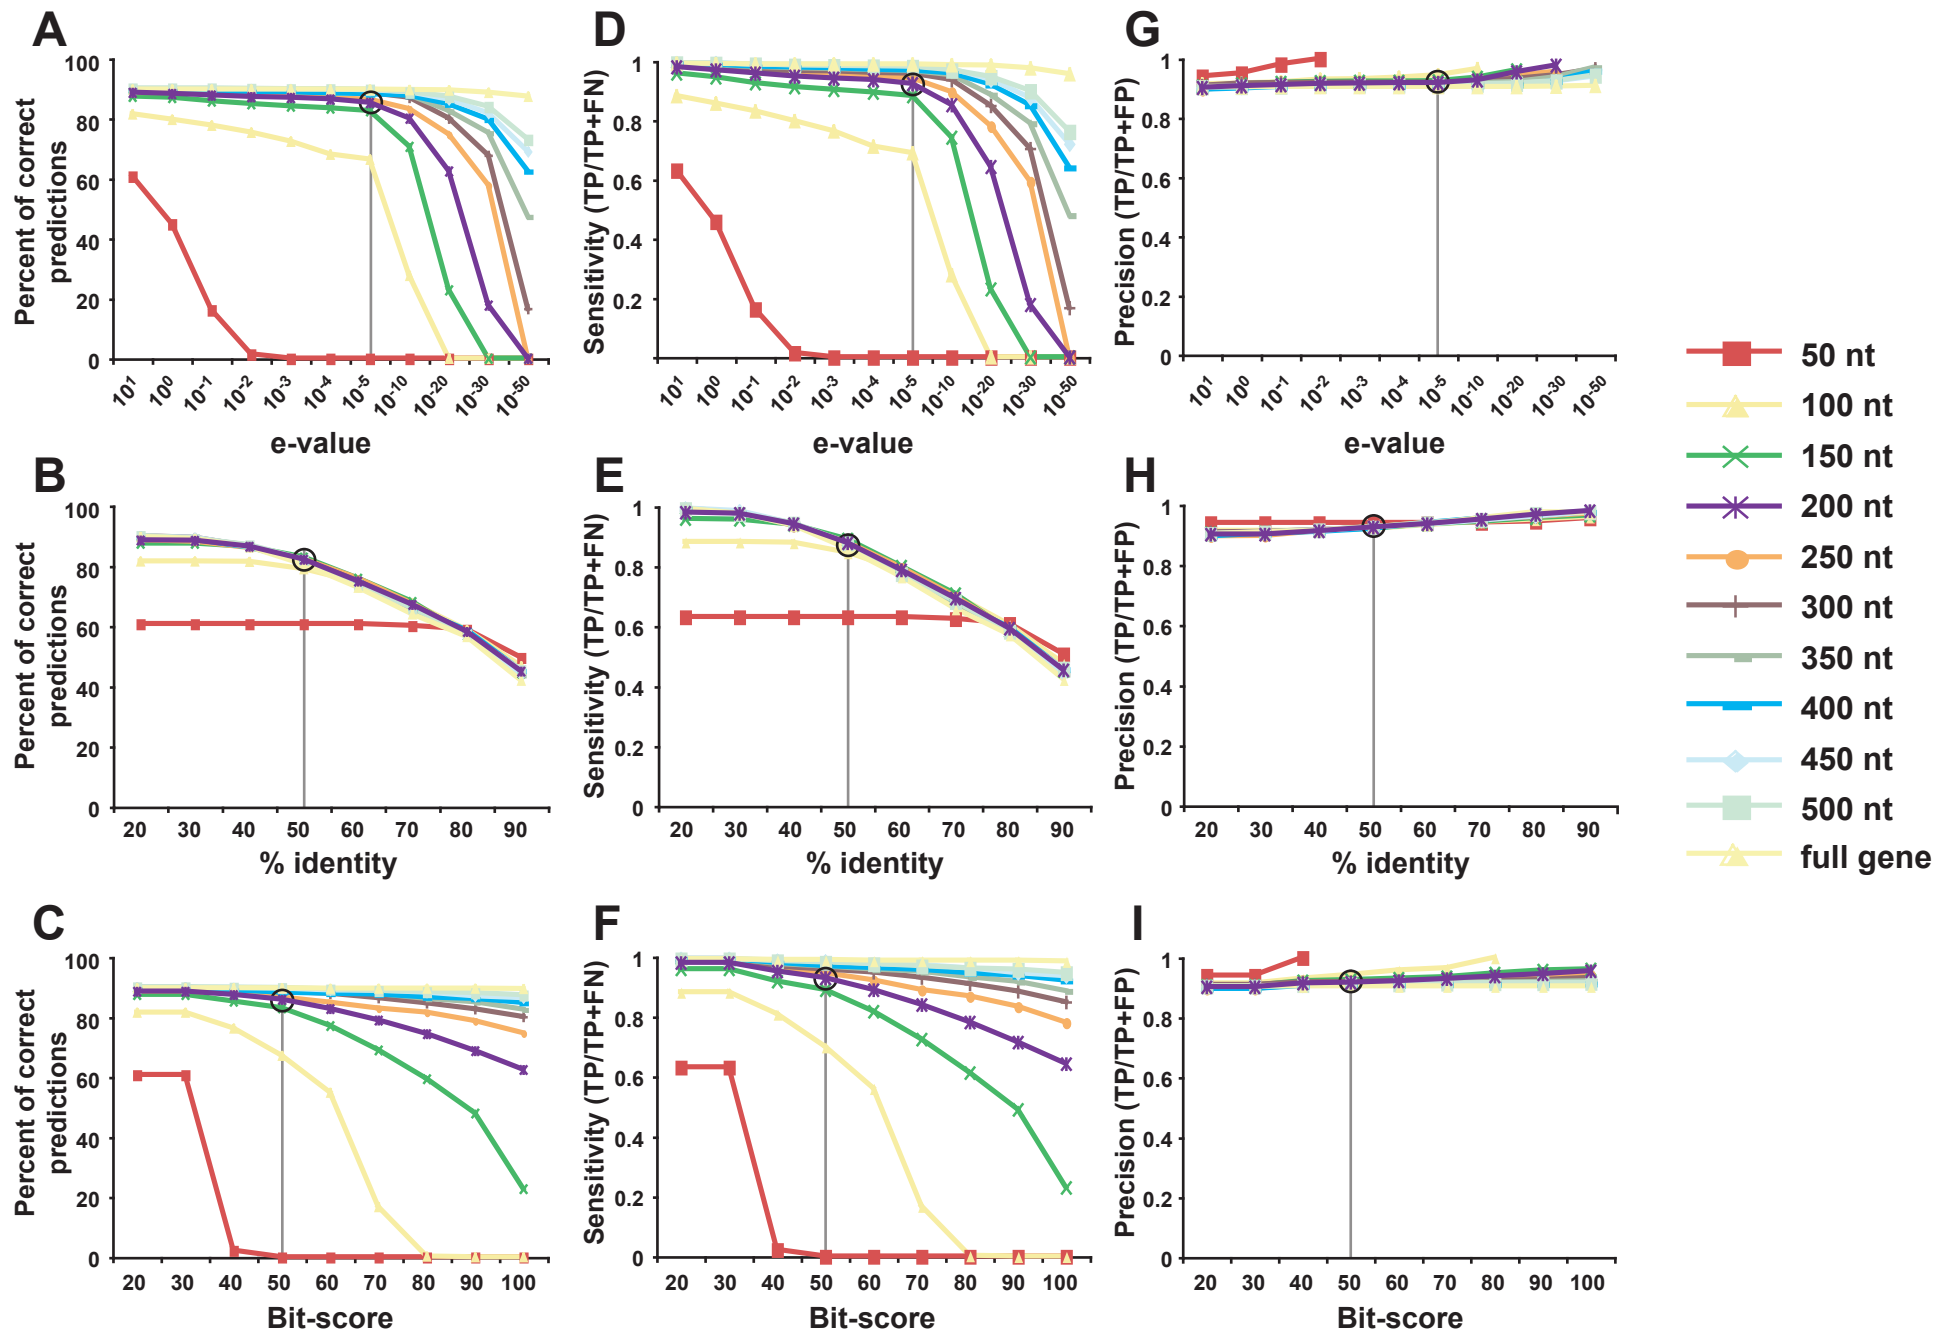

**Figure 12. Dependence of percentage (A), quality (B), and accuracy (C-D) of sequence assignments on read-length.** Two fecal samples were processed using extra-long read pyrosequencing (454 FLX Titanium kit; samples TS28 and TS29). 10,000 sequences from the maximum of each read-length distribution (between 490 and 505 nt) were randomly selected from each sample. Simulated reads were created by sampling the first 50-500 nt of each of these 10,000 sequences, and each simulated read was compared using NCBI-BLASTX against our custom gut genome database. Multiple BLAST thresholds were used (see key in panel A). **(A)** Percent of sequences assigned to the reference genomes as a function of read-length. **(B)** Average BLAST bit score as a function of read-length. **(C)** Percent of gene assignments (from the gut genome database) identical to full-length sequence as a function of read-length. **(D)** Percent of group assignments (same assigned COG as the full-length sequence) as a function of read-length.

**A**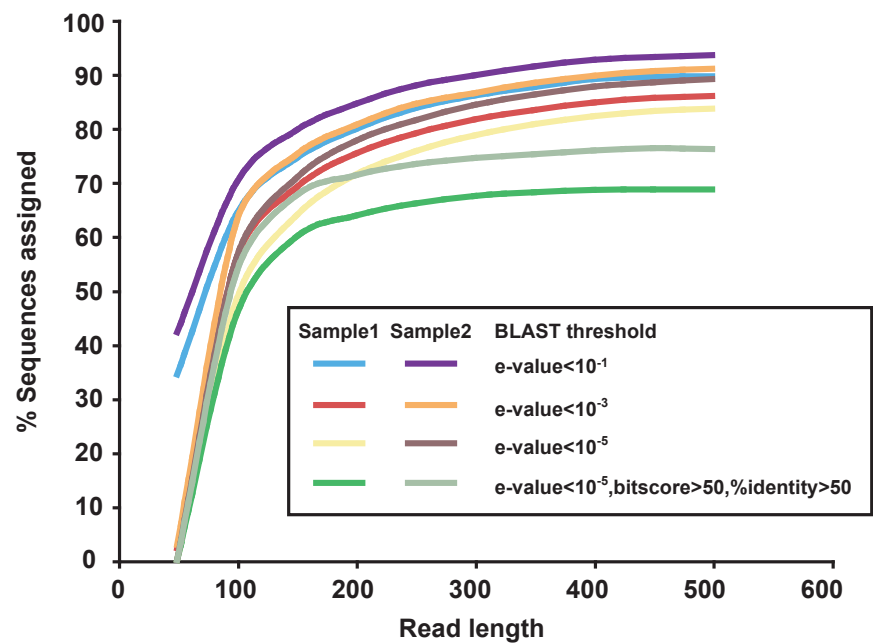**B**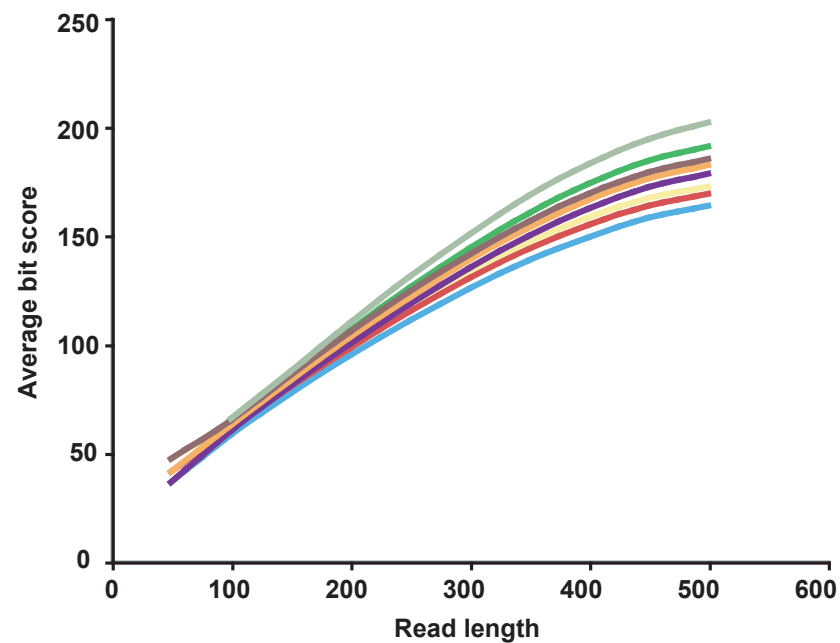**C**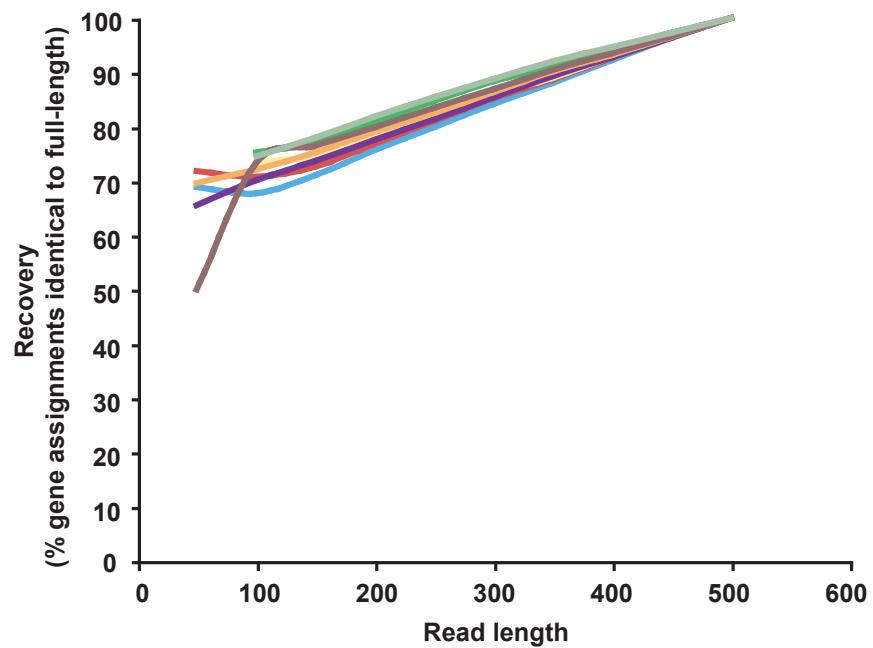**D**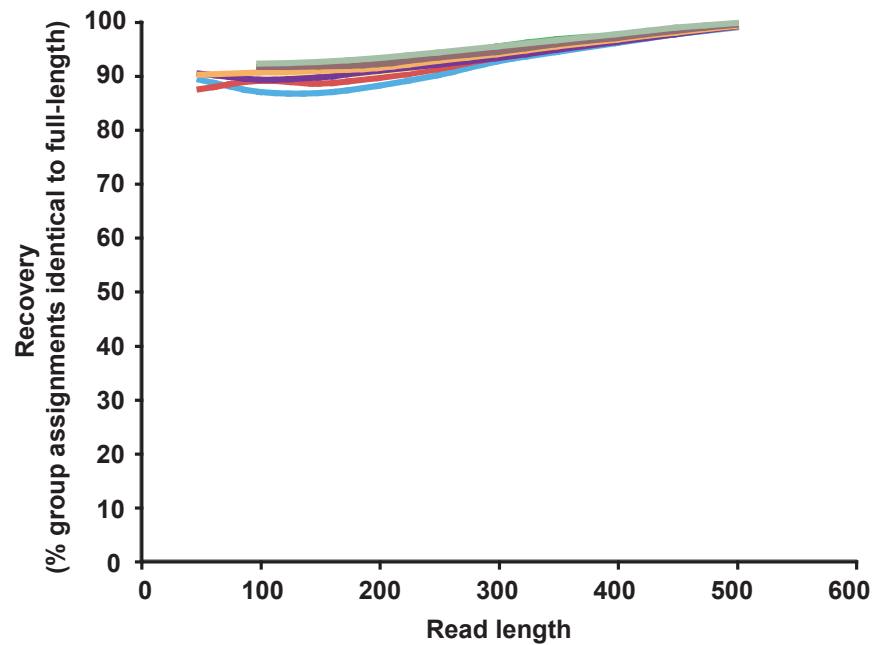

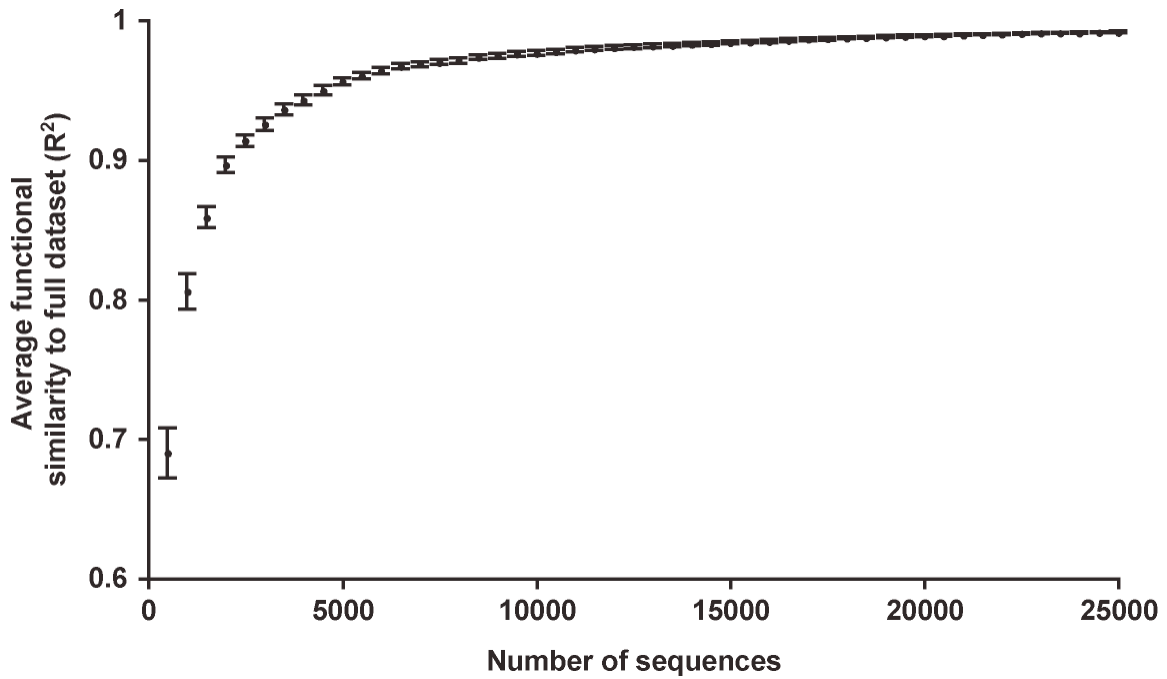

**Figure 13. Functional profiles of MZ fecal microbiomes, based on the relative abundance of KEGG pathways, stabilize after ~20,000 sequences are collected for a given sample.** Datasets were randomly subsampled between 500 and 25,000 sequences. The average functional similarity ( $R^2$ ) between the subsampled dataset and the full dataset is shown as a function of sequencing effort.

**Figure 14. KEGG pathways and CAZy families whose representation is significantly different between Firmicutes and Bacteroidetes bins.** Sequences from each of the 18 fecal microbiomes were binned based on sequence homology to the custom 44-member reference human gut genome database. **(A)** The frequency of each KEGG pathway was tallied for each bin and significantly different pathways were identified using a bootstrap re-sampling analysis<sup>23</sup> (Xipe v2.4). Significantly different pathways reaching at least 0.6% relative abundance in at least two microbiomes were clustered using single-linkage hierarchical clustering and the Pearson's correlation distance metric. **(B)** The relative abundance of CAZy families in the Bacteroidetes and Firmicutes sequence bins. Asterisks indicate significant differences (Mann-Whitney test,  $p < 0.0001$ ).



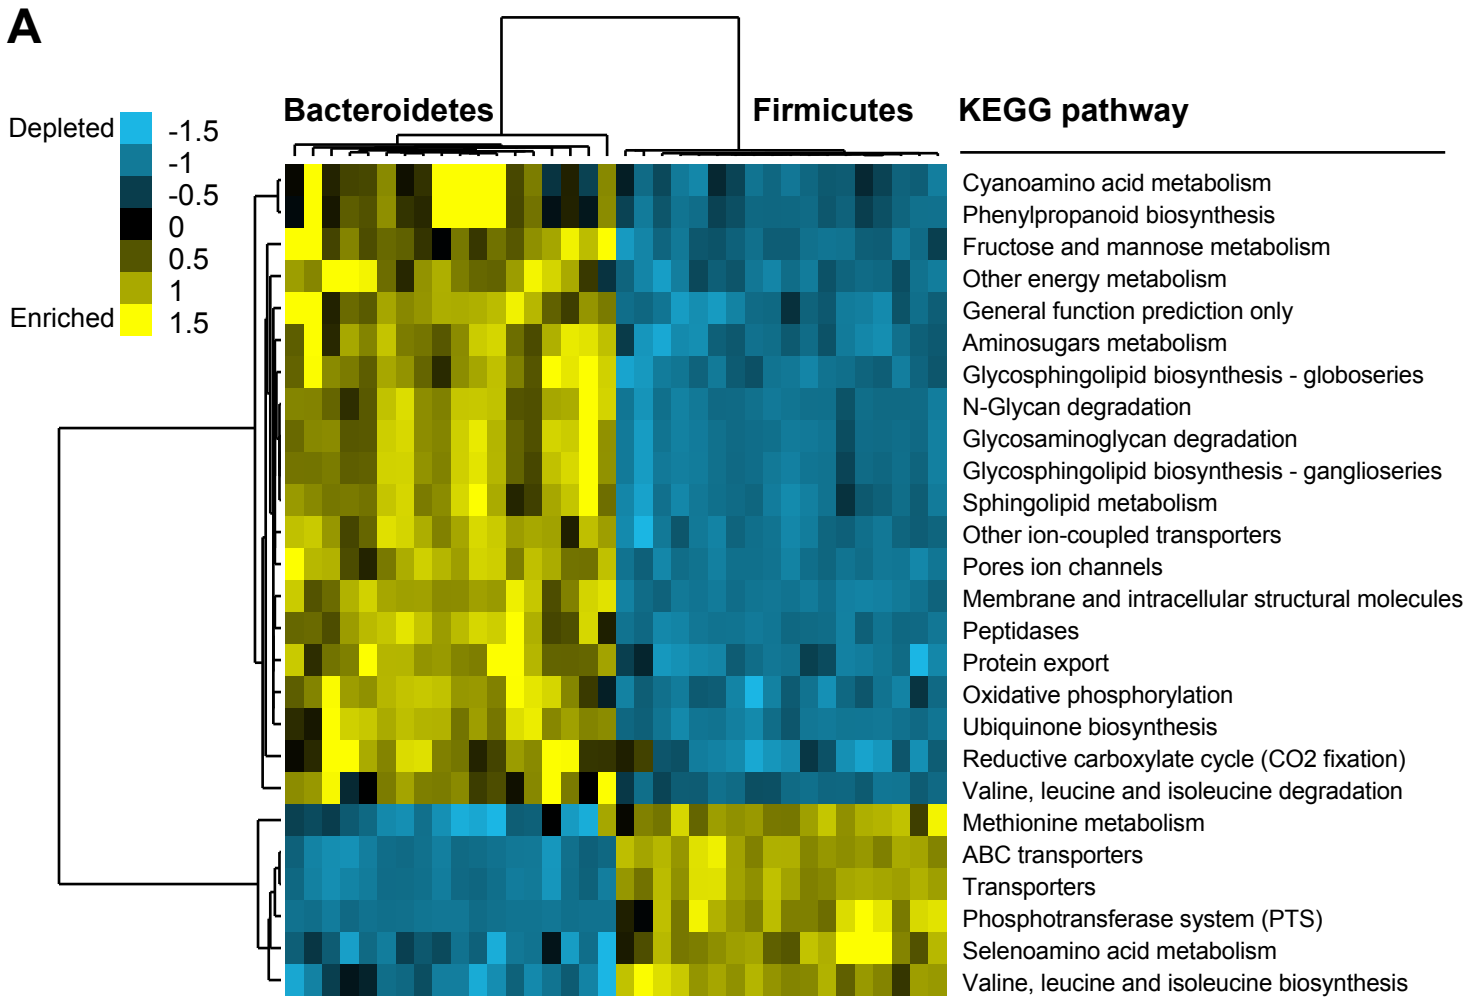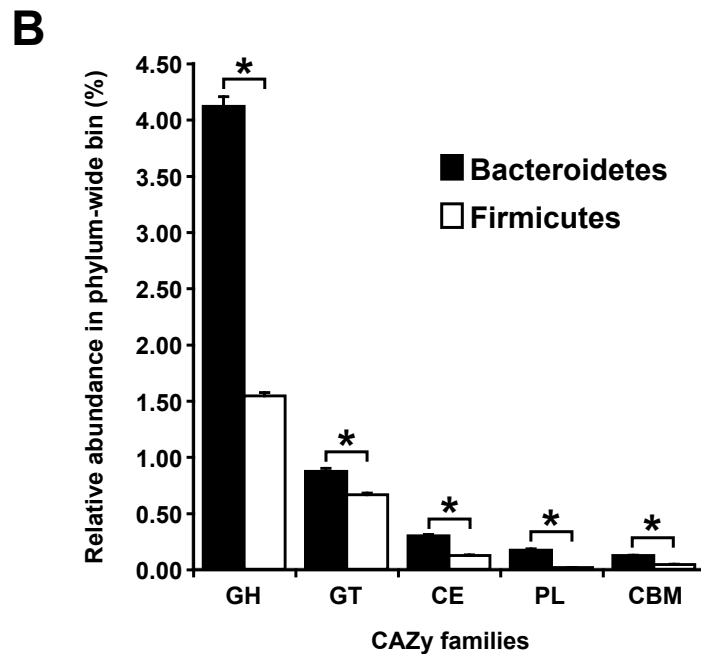

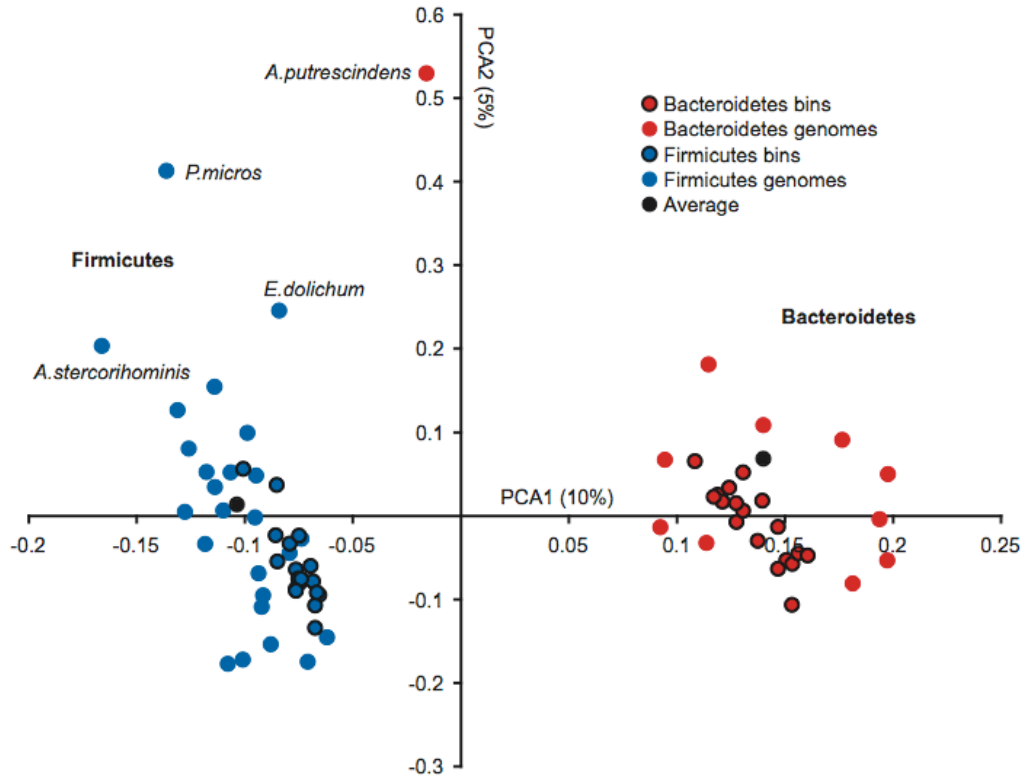

**Figure 15. Functional clustering of phylum-wide sequence bins and reference genomes from 36 human gut-derived Bacteroidetes and Firmicutes.** The frequency of each KEGG pathway in phylum-wide sequence bins, and in 10,000 ‘simulated reads’ generated from each of the reference genomes (Readsim v0.10; ref. 50), was tallied and pathways reaching at least 0.6% relative abundance in at least two fecal microbiomes were clustered using Principal Components Analysis (PCA). An ‘average’ Firmicutes and Bacteroidetes genome was generated by pooling all reads generated from genomes within each phylum.

**Figure 16. Relative abundance of KEGG pathways and COG categories in the gut microbiomes of 18 individuals (6 MZ twin pairs and their mothers), plus 9 previously published adult microbiomes<sup>20,21</sup>.** ‘Simulated reads’ were generated from each of the 9 previously published microbiomes datasets obtained by capillary sequencing to mimic pyrosequencing reads, then re-annotated using the KEGG<sup>17</sup> and STRING-extended COG databases<sup>18</sup>. **(A)** The average relative abundance of KEGG pathways in MZ twin pairs and their mothers graphed as a function of the average relative abundance of KEGG pathways in the 9 previously published adult gut microbiome datasets. **(B)** The distribution of COG categories across all 27 datasets.

**A**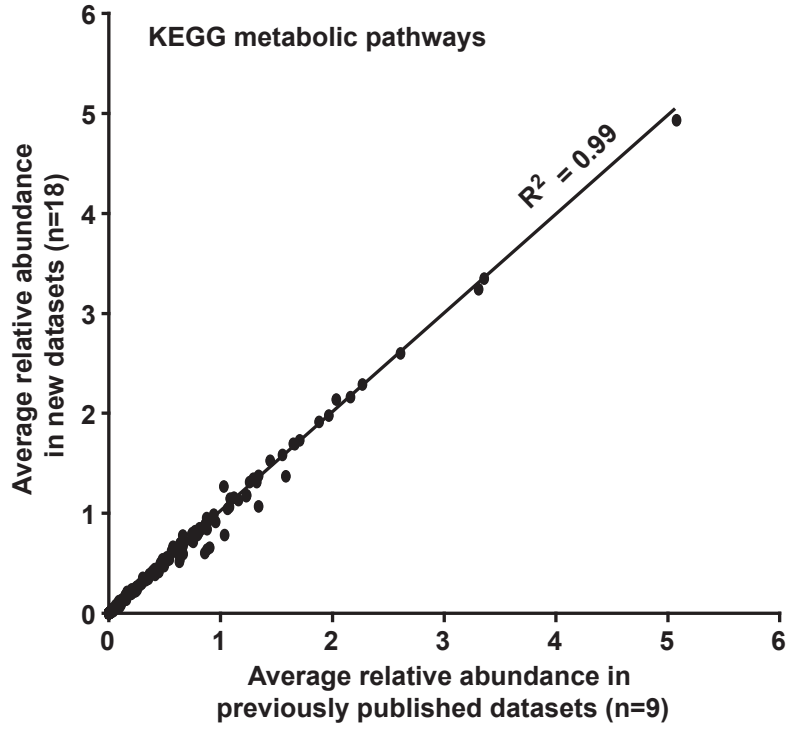**B**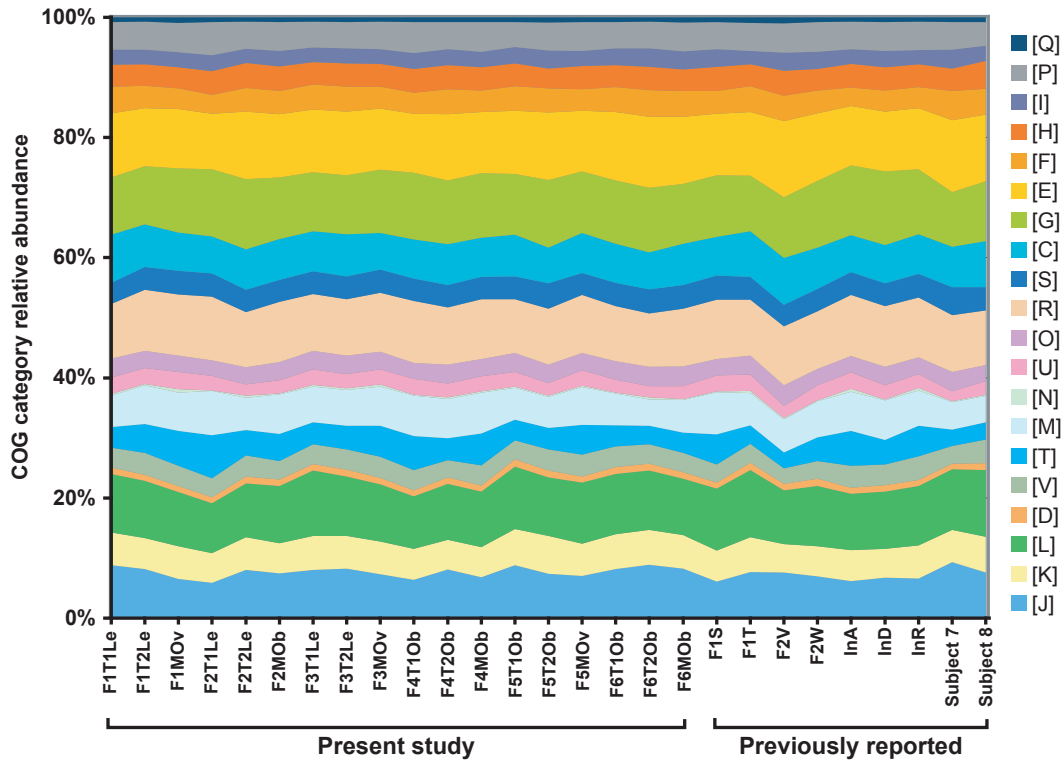

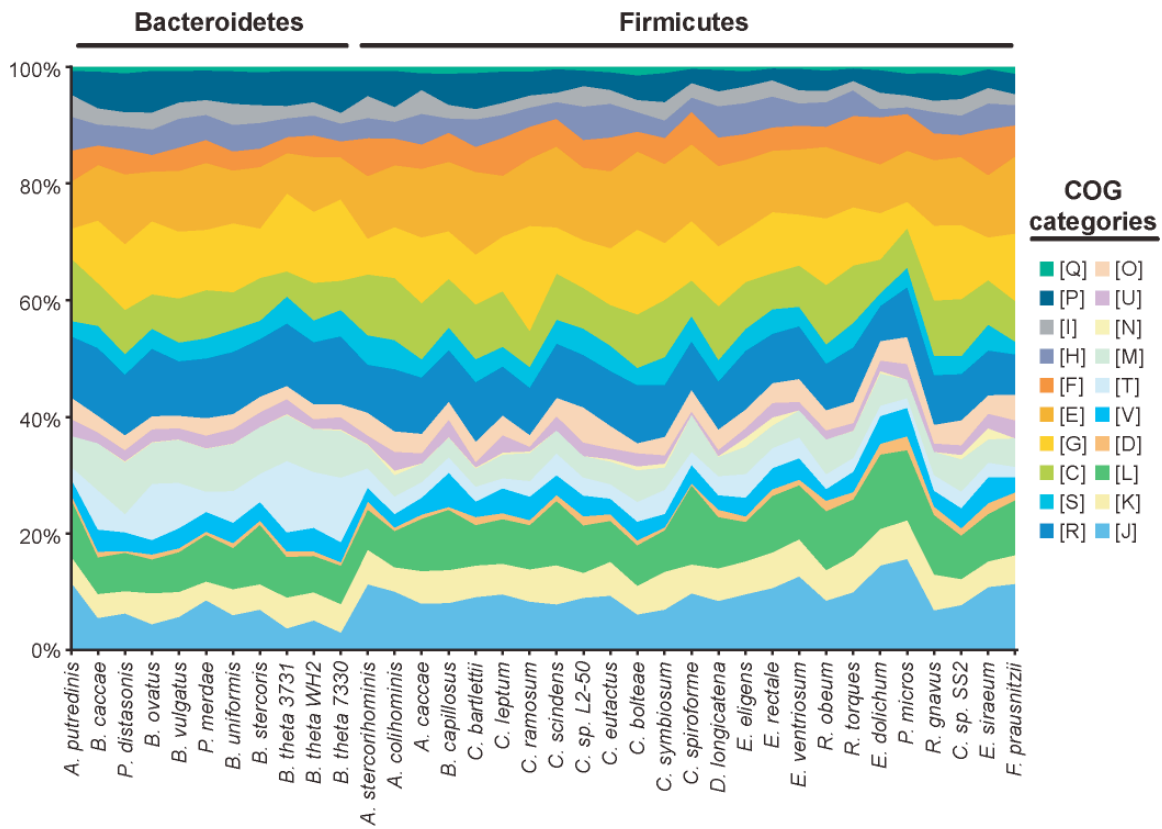

**Figure 17. Relative abundance of COG categories in 36 sequenced reference human gut-derived Firmicutes and Bacteroidetes genomes.** 10,000 ‘simulated reads’, generated from each of the reference genomes (Readsim v0.10; ref. 50), were annotated using the STRING-extended COG database<sup>18</sup>.

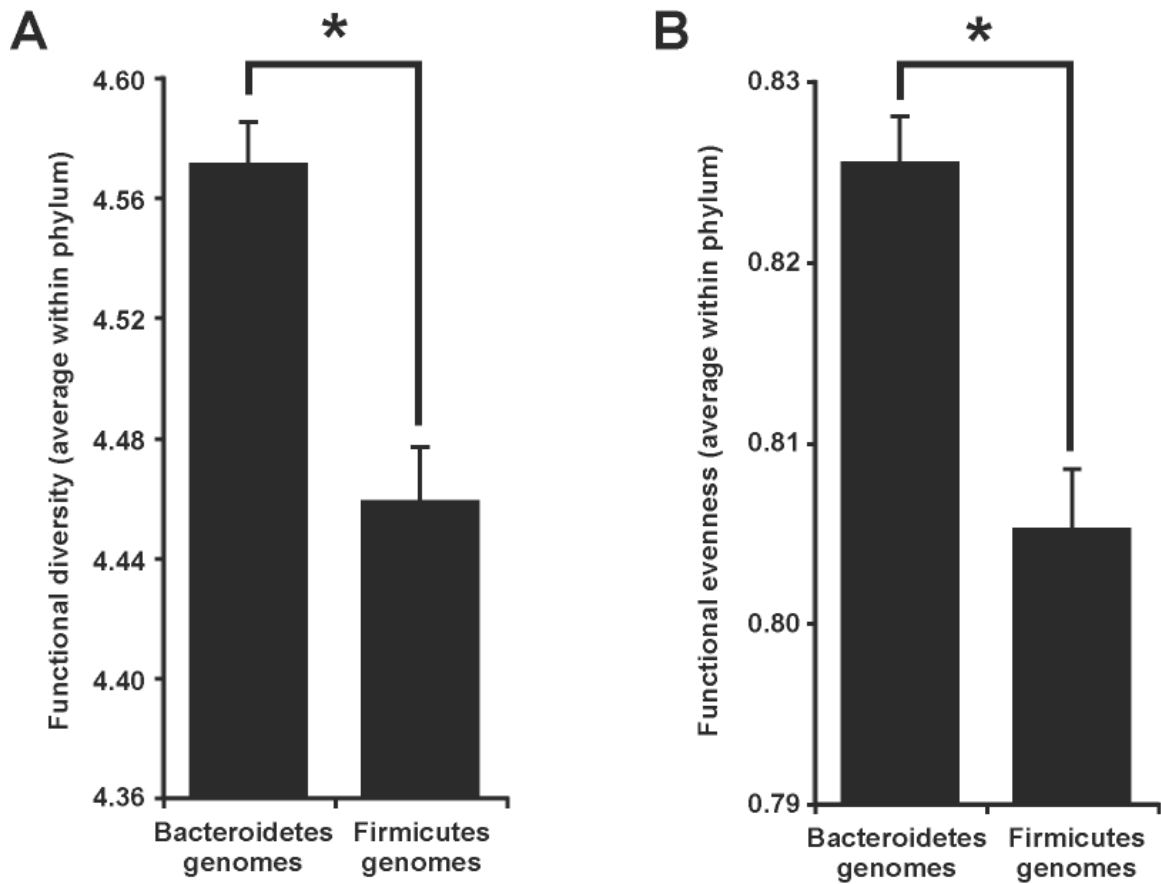

**Figure 18. Average functional diversity and evenness of ‘simulated reads’ generated from reference gut Firmicute or Bacteroidetes genomes. (A)** Functional diversity was calculated in EstimateS<sup>49</sup> (v8.0), based on the abundance of each metabolic pathway across 10,000 ‘simulated reads’ generated from each of the 36 reference genomes (Readsim v0.10; ref. 50). **(B)** Shannon evenness. Asterisks indicate significant differences (Mann-Whitney test,  $p < 0.01$ ).

**Figure 19. ‘Enzyme’-level functional groups shared between all or a subset of the sampled gut microbiomes.** Sequences from each of the 18 microbiomes characterized in this study were assigned to (A) KEGG groups, (B) CAZy families, and (C) STRING annotations (see Supplementary Methods). The proportion of functional groups (inner circle), and the proportion of sequences assigned to each functional group (outer circle) were tallied based on the co-occurrence of each functional group in any combination of 1 to 18 microbiomes. For example, the outer aqua-colored segment (labeled with the number 18) in Panel A shows that 96.2% of the total sequences generated from all 18 samples were assigned to functional groups that were common to all 18 microbiomes, while the outer blue-colored segment indicates that 1.4% of the total sequences were assigned to groups common to 17 microbiomes. The inner aqua-colored segment (number 18) in Panel A demonstrates that 39.9% of the functional groups found across the total dataset were common to all 18 samples, while the inner light blue-colored segment (number 1) indicates groups only found in one sample. (D) Rarefaction curves of the increasing number of ‘core’ or ‘variable’ functional groups obtained with additional metagenomic sequencing, as defined by the number of STRING orthologous groups that are or are not shared across all 18 microbiomes after randomly sampling each microbiome in 1,000 sequence intervals.

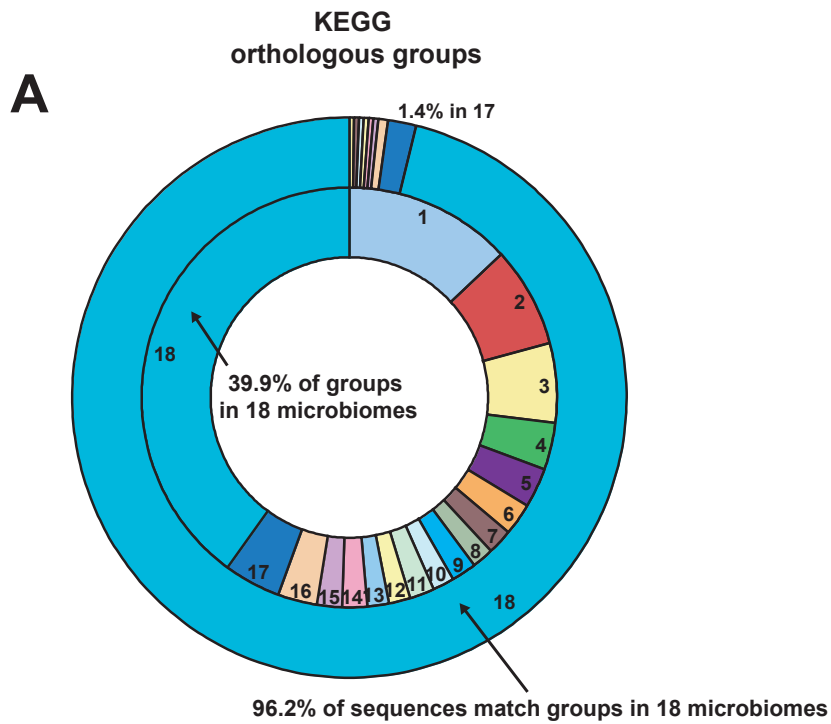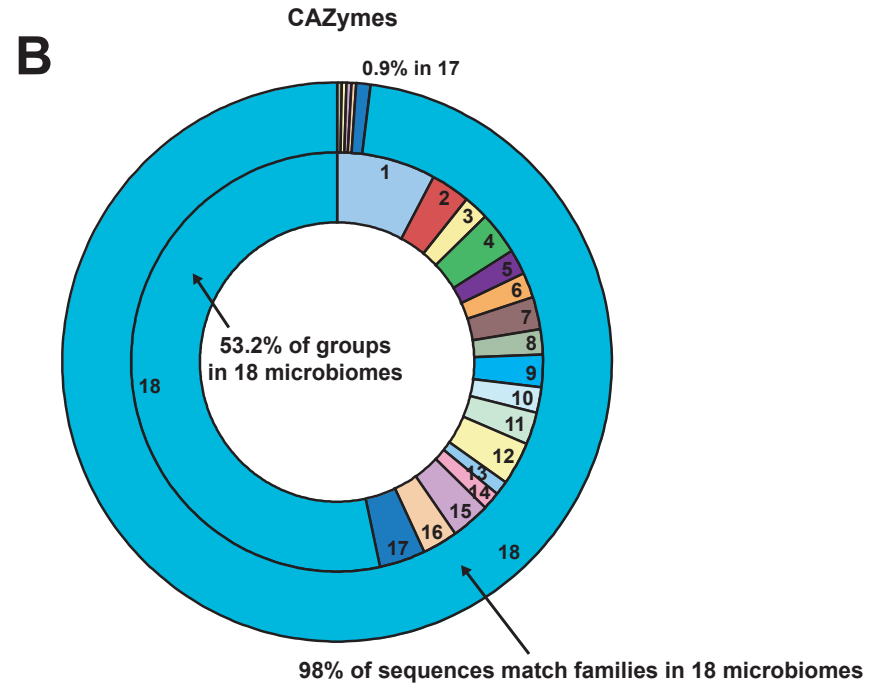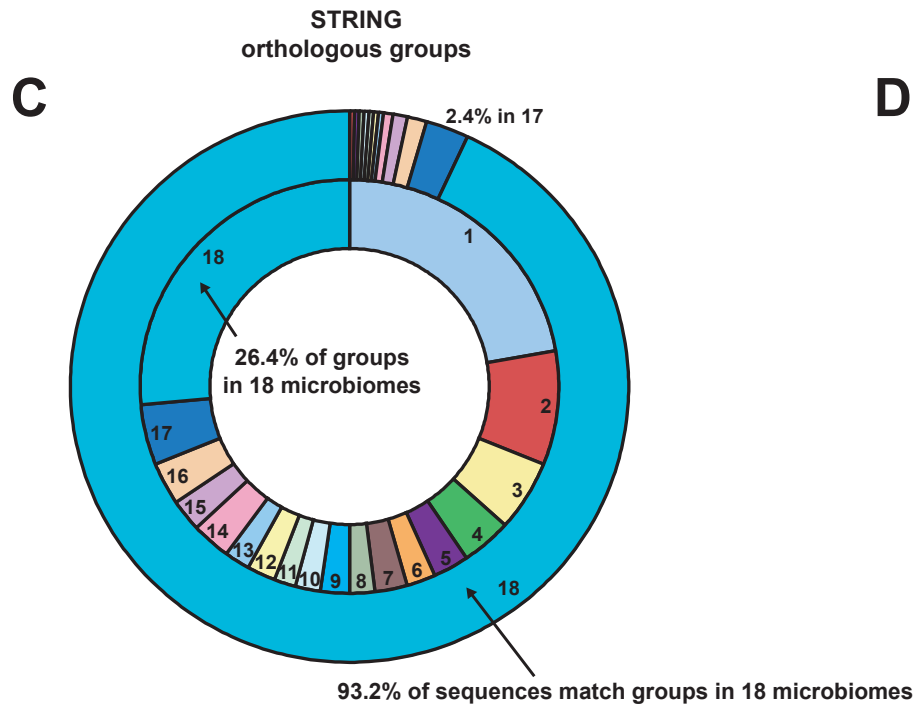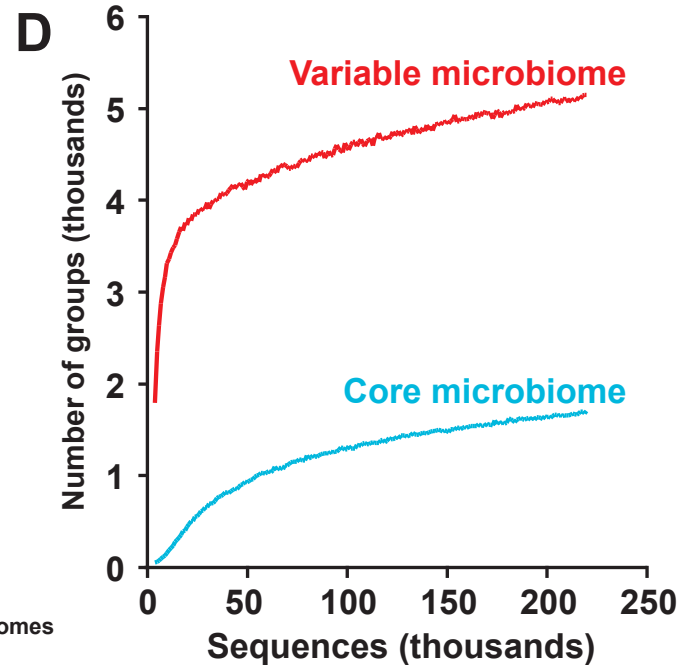



**Figure 20. Clustering of pathways enriched or depleted in the core microbiome.**

Sequences from each of the 18 distal gut microbiomes were binned into the ‘core’ or ‘variable’ microbiome based on the co-occurrence of KEGG orthologous groups [core groups were found in all 18 microbiomes while variable groups were present in fewer (<18) microbiomes; see **Supplementary Figure 19A**]. The frequency of each KEGG pathway was tallied for each bin and significantly different pathways were identified using a bootstrap re-sampling analysis<sup>23</sup> (Xipe v2.4). Pathways significantly enriched (yellow) or depleted (blue), reaching at least 0.6% relative abundance in at least two microbiomes, were clustered using single-linkage hierarchical clustering and the Pearson’s correlation distance metric.

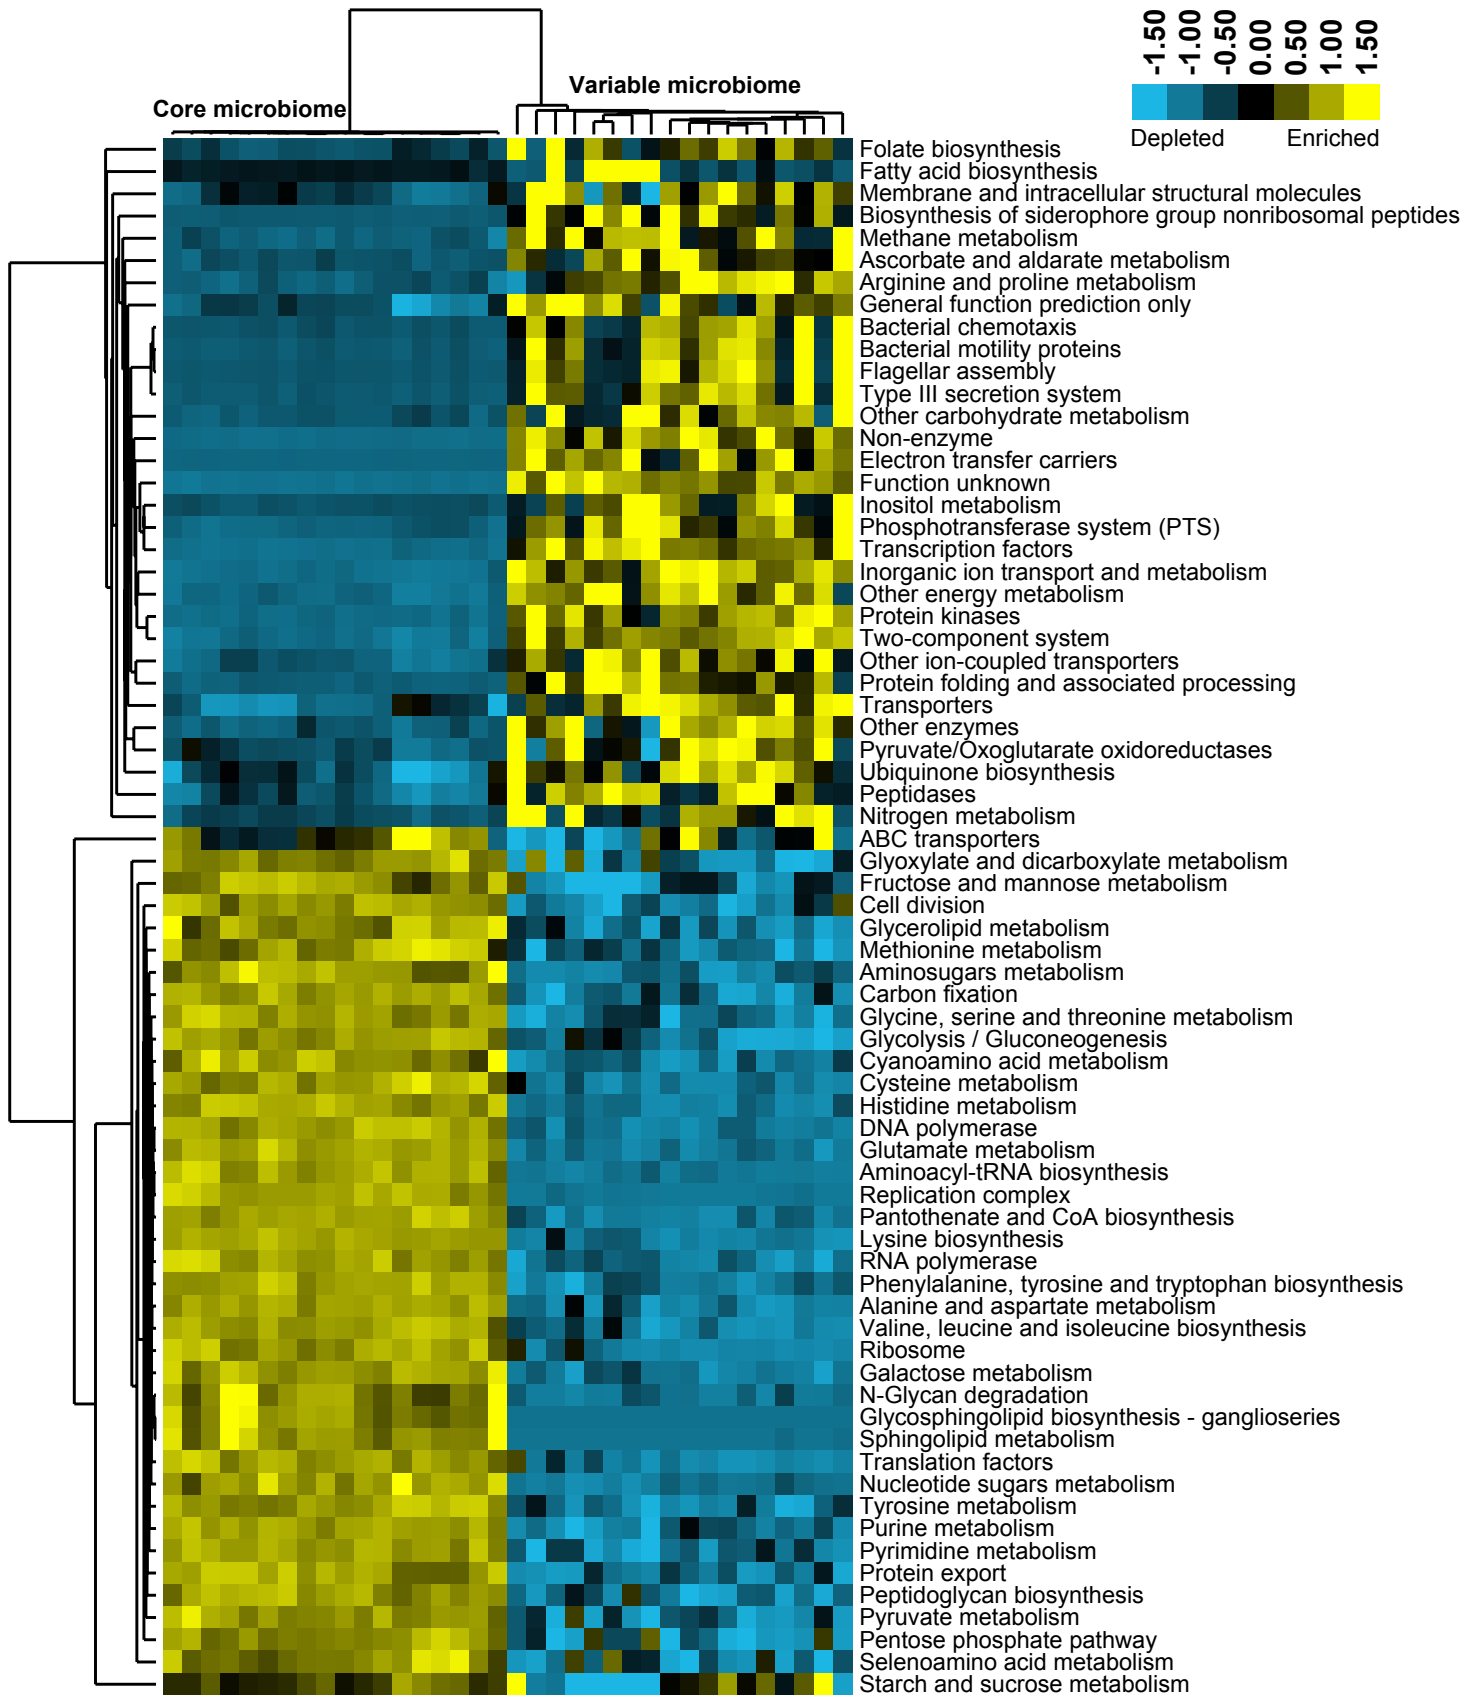

## Supplementary Tables

Supplementary Table 1: V2 16S rRNA gene sequencing statistics

| Subject ID <sup>a</sup> | Data ID/timepoint | Family number | Twin/Mom | Ancestry | Zygoty | BMI category | Months without Antibiotics <sup>b</sup> | Total sequences |
|-------------------------|-------------------|---------------|----------|----------|--------|--------------|-----------------------------------------|-----------------|
| F1T1Le1                 | TS1               | 1             | Twin     | EA       | MZ     | Lean         | >6                                      | 6415            |
| F1T1Le2                 | TS1.2             | 1             | Twin     | EA       | MZ     | Lean         | >6                                      | 1627            |
| F1T2Le1                 | TS2               | 1             | Twin     | EA       | MZ     | Lean         | NA                                      | 15495           |
| F1T2Le2                 | TS2.2             | 1             | Twin     | EA       | MZ     | Lean         | >6                                      | 1957            |
| F1MOv1                  | TS3               | 1             | Mom      | EA       | NA     | Overweight   | >6                                      | 7870            |
| F1MOv2                  | TS3.2             | 1             | Mom      | EA       | NA     | Overweight   | >6                                      | 1799            |
| F2T1Le1                 | TS4               | 2             | Twin     | EA       | MZ     | Lean         | >6                                      | 9343            |
| F2T1Le2                 | TS4.2             | 2             | Twin     | EA       | MZ     | Lean         | >6                                      | 2886            |
| F2T2Le1                 | TS5               | 2             | Twin     | EA       | MZ     | Lean         | >6                                      | 13991           |
| F2T2Le2                 | TS5.2             | 2             | Twin     | EA       | MZ     | Lean         | >6                                      | 3606            |
| F2MOb1                  | TS6               | 2             | Mom      | EA       | NA     | Obese        | >6                                      | 7717            |
| F2MOb2                  | TS6.2             | 2             | Mom      | EA       | NA     | Obese        | >6                                      | 4325            |
| F3T1Le1                 | TS7               | 3             | Twin     | EA       | MZ     | Lean         | >6                                      | 11808           |
| F3T1Le2                 | TS7.2             | 3             | Twin     | EA       | MZ     | Lean         | >6                                      | 2962            |
| F3T2Le1                 | TS8               | 3             | Twin     | EA       | MZ     | Lean         | >6                                      | 16793           |
| F3T2Le2                 | TS8.2             | 3             | Twin     | EA       | MZ     | Lean         | >6                                      | 632             |
| F3MOv1                  | TS9               | 3             | Mom      | EA       | NA     | Overweight   | >6                                      | 11291           |
| F3MOb2                  | TS9.2             | 3             | Mom      | EA       | NA     | Obese        | >6                                      | 2965            |
| F4T1Ob1                 | TS10              | 4             | Twin     | AA       | MZ     | Obese        | >6                                      | 2280            |
| F4T1Ob2                 | TS10.2            | 4             | Twin     | AA       | MZ     | Obese        | >6                                      | 979             |
| F4T2Ob1                 | TS11              | 4             | Twin     | AA       | MZ     | Obese        | >6                                      | 2458            |
| F4T2Ob2                 | TS11.2            | 4             | Twin     | AA       | MZ     | Obese        | >6                                      | 2437            |
| F4MOb1                  | TS12              | 4             | Mom      | AA       | NA     | Obese        | >1                                      | 2086            |
| F4MOb2                  | TS12.2            | 4             | Mom      | AA       | NA     | Obese        | >2                                      | 1692            |
| F5T1Le1                 | TS13              | 5             | Twin     | EA       | MZ     | Lean         | >6                                      | 8509            |
| F5T1Le2                 | TS13.2            | 5             | Twin     | EA       | MZ     | Lean         | >6                                      | 1689            |
| F5T2Le1                 | TS14              | 5             | Twin     | EA       | MZ     | Lean         | >6                                      | 15903           |
| F5MOv1                  | TS15              | 5             | Mom      | EA       | NA     | Overweight   | >6                                      | 15690           |
| F5MOv2                  | TS15.2            | 5             | Mom      | EA       | NA     | Overweight   | >6                                      | 3967            |
| F6T1Le1                 | TS16              | 6             | Twin     | EA       | MZ     | Lean         | NA                                      | 5975            |
| F6T2Le1                 | TS17              | 6             | Twin     | EA       | MZ     | Lean         | >6                                      | 1182            |
| F7T1Ob1                 | TS19              | 7             | Twin     | EA       | MZ     | Obese        | >6                                      | 21469           |
| F7T1Ob2                 | TS19.2            | 7             | Twin     | EA       | MZ     | Obese        | >6                                      | 3953            |
| F7T2Ob1                 | TS20              | 7             | Twin     | EA       | MZ     | Obese        | >6                                      | 32871           |
| F7T2Ob2                 | TS20.2            | 7             | Twin     | EA       | MZ     | Obese        | >6                                      | 5045            |
| F7MOb1                  | TS21              | 7             | Mom      | EA       | NA     | Obese        | >6                                      | 26781           |
| F7MOb2                  | TS21.2            | 7             | Mom      | EA       | NA     | Obese        | >6                                      | 4752            |
| F8T1Le1                 | TS22              | 8             | Twin     | EA       | MZ     | Lean         | >6                                      | 5110            |
| F8T2Le1                 | TS23              | 8             | Twin     | EA       | MZ     | Lean         | >6                                      | 1978            |
| F9T1Le1                 | TS25              | 9             | Twin     | EA       | MZ     | Lean         | >6                                      | 10017           |
| F9T1Le2                 | TS25.2            | 9             | Twin     | EA       | MZ     | Lean         | >6                                      | 4626            |
| F9T2Le1                 | TS26              | 9             | Twin     | EA       | MZ     | Lean         | >6                                      | 16757           |
| F9T2Le2                 | TS26.2            | 9             | Twin     | EA       | MZ     | Lean         | >6                                      | 5111            |
| F9MOb1                  | TS27              | 9             | Mom      | EA       | NA     | Obese        | >6                                      | 11885           |
| F9MOb2                  | TS27.2            | 9             | Mom      | EA       | NA     | Obese        | >6                                      | 2068            |
| F10T1Ob1                | TS28              | 10            | Twin     | EA       | MZ     | Obese        | >6                                      | 6694            |
| F10T2Ob1                | TS29              | 10            | Twin     | EA       | MZ     | Obese        | >6                                      | 2411            |
| F10MOv1                 | TS30              | 10            | Mom      | EA       | NA     | Overweight   | >6                                      | 8273            |
| F10MLe2                 | TS30.2            | 10            | Mom      | EA       | NA     | Lean         | >6                                      | 3280            |
| F11T1Le1                | TS31              | 11            | Twin     | EA       | MZ     | Lean         | >6                                      | 18941           |
| F11T1Le2                | TS31.2            | 11            | Twin     | EA       | MZ     | Lean         | >6                                      | 5842            |
| F11T2Le1                | TS32              | 11            | Twin     | EA       | MZ     | Lean         | >6                                      | 9773            |
| F11T2Le2                | TS32.2            | 11            | Twin     | EA       | MZ     | Lean         | >6                                      | 6178            |
| F11MOv1                 | TS33              | 11            | Mom      | EA       | NA     | Overweight   | >6                                      | 18037           |
| F11MOv2                 | TS33.2            | 11            | Mom      | EA       | NA     | Overweight   | >6                                      | 1593            |
| F12T1Ob1                | TS34              | 12            | Twin     | EA       | MZ     | Obese        | >6                                      | 1730            |
| F12T2Ob1                | TS35              | 12            | Twin     | EA       | MZ     | Obese        | >6                                      | 3887            |
| F13T1Ob1                | TS37              | 13            | Twin     | EA       | MZ     | Obese        | >6                                      | 3534            |
| F13T1Ob2                | TS37.2            | 13            | Twin     | EA       | MZ     | Obese        | >6                                      | 4458            |
| F13T2Ov1                | TS38              | 13            | Twin     | EA       | MZ     | Overweight   | >6                                      | 3043            |
| F13T2Ov2                | TS38.2            | 13            | Twin     | EA       | MZ     | Overweight   | >6                                      | 2566            |

|          |        |    |      |    |    |            |    |       |
|----------|--------|----|------|----|----|------------|----|-------|
| F13MOB1  | TS39   | 13 | Mom  | EA | NA | Obese      | >6 | 5848  |
| F13MOB2  | TS39.2 | 13 | Mom  | EA | NA | Obese      | >6 | 2146  |
| F14T1Ob1 | TS43   | 14 | Twin | EA | MZ | Obese      | >6 | 2905  |
| F14T2Ob1 | TS44   | 14 | Twin | EA | MZ | Obese      | >6 | 1621  |
| F15T1Ob1 | TS49   | 15 | Twin | EA | MZ | Obese      | >6 | 11936 |
| F15T1Ob2 | TS49.2 | 15 | Twin | EA | MZ | Obese      | >6 | 4220  |
| F15T2Ob1 | TS50   | 15 | Twin | EA | MZ | Obese      | >6 | 12672 |
| F15T2Ob2 | TS50.2 | 15 | Twin | EA | MZ | Obese      | >6 | 4603  |
| F15MOB1  | TS51   | 15 | Mom  | EA | NA | Obese      | >6 | 13789 |
| F15MOB2  | TS51.2 | 15 | Mom  | EA | NA | Obese      | >6 | 3284  |
| F16T1Ob1 | TS55   | 16 | Twin | EA | DZ | Obese      | >6 | 3817  |
| F16T1Ob2 | TS55.2 | 16 | Twin | EA | DZ | Obese      | >6 | 5210  |
| F16T2Ob1 | TS56   | 16 | Twin | EA | DZ | Obese      | >6 | 5147  |
| F16T2Ob2 | TS56.2 | 16 | Twin | EA | DZ | Obese      | >6 | 4490  |
| F16MOB1  | TS57   | 16 | Mom  | EA | NA | Obese      | >0 | 8440  |
| F16MOB2  | TS57.2 | 16 | Mom  | EA | NA | Obese      | >1 | 2365  |
| F17T1Ob1 | TS61   | 17 | Twin | EA | DZ | Obese      | >6 | 672   |
| F17T1Ob2 | TS61.2 | 17 | Twin | EA | DZ | Obese      | >6 | 3738  |
| F17T2Ob1 | TS62   | 17 | Twin | EA | DZ | Obese      | >6 | 2311  |
| F17T2Ob2 | TS62.2 | 17 | Twin | EA | DZ | Obese      | >6 | 3821  |
| F17MOB1  | TS63   | 17 | Mom  | EA | NA | Obese      | >6 | 2132  |
| F17MOB2  | TS63.2 | 17 | Mom  | EA | NA | Obese      | >6 | 1853  |
| F18T1Ov1 | TS64   | 18 | Twin | EA | MZ | Overweight | >6 | 4571  |
| F18T1Ov2 | TS64.2 | 18 | Twin | EA | MZ | Overweight | >6 | 4523  |
| F18T2Ob1 | TS65   | 18 | Twin | EA | MZ | Obese      | >6 | 2502  |
| F18T2Ob2 | TS65.2 | 18 | Twin | EA | MZ | Obese      | >6 | 3943  |
| F18MOB1  | TS66   | 18 | Mom  | EA | NA | Obese      | >6 | 3491  |
| F18MOB2  | TS66.2 | 18 | Mom  | EA | NA | Obese      | >6 | 6187  |
| F19T1Ob1 | TS67   | 19 | Twin | EA | DZ | Obese      | NA | 988   |
| F19T1Ob2 | TS67.2 | 19 | Twin | EA | DZ | Obese      | NA | 1861  |
| F19T2Ob1 | TS68   | 19 | Twin | EA | DZ | Obese      | >6 | 3870  |
| F19T2Ob2 | TS68.2 | 19 | Twin | EA | DZ | Obese      | >6 | 2242  |
| F19MOB1  | TS69   | 19 | Mom  | EA | NA | Obese      | >6 | 5290  |
| F19MOB2  | TS69.2 | 19 | Mom  | EA | NA | Obese      | >0 | 2305  |
| F20T1Ob1 | TS70   | 20 | Twin | EA | DZ | Obese      | >6 | 2139  |
| F20T1Ob2 | TS70.2 | 20 | Twin | EA | DZ | Obese      | >6 | 2166  |
| F20T2Ob1 | TS71   | 20 | Twin | EA | DZ | Obese      | >6 | 3130  |
| F20T2Ob2 | TS71.2 | 20 | Twin | EA | DZ | Obese      | >6 | 2293  |
| F20MOB1  | TS72   | 20 | Mom  | EA | NA | Obese      | >6 | 1674  |
| F20MOB2  | TS72.2 | 20 | Mom  | EA | NA | Obese      | >6 | 379   |
| F21T1Ob1 | TS73   | 21 | Twin | EA | DZ | Obese      | >6 | 2963  |
| F21T2Ob1 | TS74   | 21 | Twin | EA | DZ | Obese      | >6 | 2177  |
| F21T2Ob2 | TS74.2 | 21 | Twin | EA | DZ | Obese      | >6 | 1791  |
| F21MOB1  | TS75   | 21 | Mom  | EA | NA | Obese      | >6 | 1434  |
| F21MOB2  | TS75.2 | 21 | Mom  | EA | NA | Obese      | >6 | 1887  |
| F22T1Ob1 | TS76   | 22 | Twin | AA | MZ | Obese      | >6 | 2977  |
| F22T1Ob2 | TS76.2 | 22 | Twin | AA | MZ | Obese      | >6 | 1962  |
| F22T2Ov1 | TS77   | 22 | Twin | AA | MZ | Overweight | >6 | 2168  |
| F22MOB1  | TS78   | 22 | Mom  | AA | NA | Obese      | >6 | 1460  |
| F22MOB2  | TS78.2 | 22 | Mom  | AA | NA | Obese      | >6 | 2482  |
| F23T1Ob1 | TS82   | 23 | Twin | AA | MZ | Obese      | >6 | 1628  |
| F23T1Ob2 | TS82.2 | 23 | Twin | AA | MZ | Obese      | >6 | 1673  |
| F23T2Ob1 | TS83   | 23 | Twin | AA | MZ | Obese      | >6 | 1572  |
| F23T2Ob2 | TS83.2 | 23 | Twin | AA | MZ | Obese      | >6 | 3349  |
| F23MOB1  | TS84   | 23 | Mom  | AA | NA | Obese      | >6 | 2215  |
| F23MOB2  | TS84.2 | 23 | Mom  | AA | NA | Obese      | >6 | 2033  |
| F24T1Ov1 | TS85   | 24 | Twin | EA | DZ | Overweight | >3 | 2385  |
| F24T1Ov2 | TS85.2 | 24 | Twin | EA | DZ | Overweight | >6 | 2122  |
| F24T2Ob1 | TS86   | 24 | Twin | EA | DZ | Obese      | >1 | 4107  |
| F24T2Ob2 | TS86.2 | 24 | Twin | EA | DZ | Obese      | >3 | 1704  |
| F24MOB1  | TS87   | 24 | Mom  | EA | NA | Obese      | >6 | 2605  |
| F24MOB2  | TS87.2 | 24 | Mom  | EA | NA | Obese      | >6 | 1587  |
| F25T1Ob1 | TS88   | 25 | Twin | EA | DZ | Obese      | >4 | 2497  |
| F25T1Ob2 | TS88.2 | 25 | Twin | EA | DZ | Obese      | >6 | 2129  |
| F25T2Ob1 | TS89   | 25 | Twin | EA | DZ | Obese      | >6 | 2108  |

|          |         |    |      |    |    |            |    |      |
|----------|---------|----|------|----|----|------------|----|------|
| F25T2Ob2 | TS89.2  | 25 | Twin | EA | DZ | Obese      | >6 | 3549 |
| F25MOB1  | TS90    | 25 | Mom  | EA | NA | Obese      | >6 | 2615 |
| F25MOB2  | TS90.2  | 25 | Mom  | EA | NA | Obese      | >6 | 2725 |
| F26T1Ob1 | TS91    | 26 | Twin | AA | MZ | Obese      | >0 | 675  |
| F26T1Ob2 | TS91.2  | 26 | Twin | AA | MZ | Obese      | >6 | 2307 |
| F26T2Ob1 | TS92    | 26 | Twin | AA | MZ | Obese      | >6 | 2036 |
| F26T2Ob2 | TS92.2  | 26 | Twin | AA | MZ | Obese      | >6 | 2335 |
| F27T1Ob1 | TS94    | 27 | Twin | AA | MZ | Obese      | >6 | 1861 |
| F27T1Ob2 | TS94.2  | 27 | Twin | AA | MZ | Obese      | >6 | 2511 |
| F27T2Ob1 | TS95    | 27 | Twin | AA | MZ | Obese      | >6 | 2842 |
| F27T2Ob2 | TS95.2  | 27 | Twin | AA | MZ | Obese      | >6 | 2550 |
| F27MOB1  | TS96    | 27 | Mom  | AA | NA | Obese      | >6 | 1516 |
| F27MOB2  | TS96.2  | 27 | Mom  | AA | NA | Obese      | >6 | 2909 |
| F28T1Ob1 | TS97    | 28 | Twin | AA | DZ | Obese      | >6 | 2326 |
| F28T1Ob2 | TS97.2  | 28 | Twin | AA | DZ | Obese      | >6 | 2944 |
| F28T2Ob1 | TS98    | 28 | Twin | AA | DZ | Obese      | >6 | 2970 |
| F28T2Ob2 | TS98.2  | 28 | Twin | AA | DZ | Obese      | >6 | 2851 |
| F28MOV2  | TS99.2  | 28 | Mom  | AA | NA | Overweight | >6 | 3136 |
| F29T1Ob1 | TS100   | 29 | Twin | AA | MZ | Obese      | >6 | 3504 |
| F29T1Ob2 | TS100.2 | 29 | Twin | AA | MZ | Obese      | >6 | 2616 |
| F29T2Ob2 | TS101.2 | 29 | Twin | AA | MZ | Obese      | >6 | 2387 |
| F30T1Ob1 | TS103   | 30 | Twin | AA | MZ | Obese      | >6 | 1473 |
| F30T1Ob2 | TS103.2 | 30 | Twin | AA | MZ | Obese      | >6 | 3012 |
| F30T2Ob1 | TS104   | 30 | Twin | AA | MZ | Obese      | >6 | 1970 |
| F30T2Ob2 | TS104.2 | 30 | Twin | AA | MZ | Obese      | >6 | 2895 |
| F30MOB1  | TS105   | 30 | Mom  | AA | NA | Obese      | >6 | 1864 |
| F30MOB2  | TS105.2 | 30 | Mom  | AA | NA | Obese      | >6 | 2096 |
| F31T1Ob1 | TS106   | 31 | Twin | AA | MZ | Obese      | >6 | 2698 |
| F31T1Ob2 | TS106.2 | 31 | Twin | AA | MZ | Obese      | >6 | 2250 |
| F31T2Ob1 | TS107   | 31 | Twin | AA | MZ | Obese      | >6 | 3132 |
| F31T2Ob2 | TS107.2 | 31 | Twin | AA | MZ | Obese      | >6 | 4521 |
| F32T1Le1 | TS109   | 32 | Twin | EA | DZ | Lean       | >6 | 2583 |
| F32T1Le2 | TS109.2 | 32 | Twin | EA | DZ | Lean       | >6 | 1682 |
| F32T2Le1 | TS110   | 32 | Twin | EA | DZ | Lean       | >6 | 2286 |
| F32T2Le2 | TS110.2 | 32 | Twin | EA | DZ | Lean       | >6 | 4408 |
| F32MLe1  | TS111   | 32 | Mom  | EA | NA | Lean       | >6 | 3822 |
| F32MLe2  | TS111.2 | 32 | Mom  | EA | NA | Lean       | >6 | 2597 |
| F33T1Ob1 | TS115   | 33 | Twin | AA | MZ | Obese      | >6 | 2619 |
| F33T1Ob2 | TS115.2 | 33 | Twin | AA | MZ | Obese      | >6 | 2017 |
| F33T2Ob1 | TS116   | 33 | Twin | AA | MZ | Obese      | >6 | 5558 |
| F33T2Ob2 | TS116.2 | 33 | Twin | AA | MZ | Obese      | >6 | 2440 |
| F33MOB1  | TS117   | 33 | Mom  | AA | NA | Obese      | >6 | 3430 |
| F33MOB2  | TS117.2 | 33 | Mom  | AA | NA | Obese      | >6 | 2932 |
| F34T1Ob1 | TS118   | 34 | Twin | AA | DZ | Obese      | >0 | 2209 |
| F34T1Ob2 | TS118.2 | 34 | Twin | AA | DZ | Obese      | >6 | 3030 |
| F34T2Ob1 | TS119   | 34 | Twin | AA | DZ | Obese      | >6 | 2791 |
| F34T2Ob2 | TS119.2 | 34 | Twin | AA | DZ | Obese      | >0 | 3828 |
| F34MOB1  | TS120   | 34 | Mom  | AA | NA | Obese      | >6 | 97   |
| F34MOB2  | TS120.2 | 34 | Mom  | AA | NA | Obese      | >6 | 3015 |
| F35T1Le1 | TS124   | 35 | Twin | EA | DZ | Lean       | >6 | 2336 |
| F35T1Le2 | TS124.2 | 35 | Twin | EA | DZ | Lean       | >6 | 2102 |
| F35T2Ov1 | TS125   | 35 | Twin | EA | DZ | Overweight | >6 | 2381 |
| F35T2Ov2 | TS125.2 | 35 | Twin | EA | DZ | Overweight | >6 | 1889 |
| F35MOB1  | TS126   | 35 | Mom  | EA | NA | Obese      | >6 | 1733 |
| F35MOB2  | TS126.2 | 35 | Mom  | EA | NA | Obese      | >6 | 2676 |
| F36T1Le1 | TS127   | 36 | Twin | EA | DZ | Lean       | >6 | 4119 |
| F36T1Le2 | TS127.2 | 36 | Twin | EA | DZ | Lean       | >6 | 1929 |
| F36T2Le1 | TS128   | 36 | Twin | EA | DZ | Lean       | >6 | 4698 |
| F36T2Le2 | TS128.2 | 36 | Twin | EA | DZ | Lean       | >6 | 2857 |
| F36MLe1  | TS129   | 36 | Mom  | EA | NA | Lean       | >6 | 2628 |
| F36MLe2  | TS129.2 | 36 | Mom  | EA | NA | Lean       | >6 | 2247 |
| F37T1Ob1 | TS130   | 37 | Twin | AA | MZ | Obese      | >6 | 3121 |
| F37T1Ob2 | TS130.2 | 37 | Twin | AA | MZ | Obese      | >1 | 3391 |
| F37T2Ob1 | TS131   | 37 | Twin | AA | MZ | Obese      | >6 | 3338 |
| F37T2Ob2 | TS131.2 | 37 | Twin | AA | MZ | Obese      | NA | 3186 |

|          |         |    |      |    |    |            |    |       |
|----------|---------|----|------|----|----|------------|----|-------|
| F37MOB1  | TS132   | 37 | Mom  | AA | NA | Obese      | >1 | 2586  |
| F37MOB2  | TS132.2 | 37 | Mom  | AA | NA | Obese      | NA | 4130  |
| F38T1Ob1 | TS133   | 38 | Twin | AA | MZ | Obese      | >6 | 2355  |
| F38T1Ob2 | TS133.2 | 38 | Twin | AA | MZ | Obese      | >6 | 3902  |
| F38T2Ob1 | TS134   | 38 | Twin | AA | MZ | Obese      | >3 | 1378  |
| F38T2Ob2 | TS134.2 | 38 | Twin | AA | MZ | Obese      | >5 | 2656  |
| F38MOB1  | TS135   | 38 | Mom  | AA | NA | Obese      | >6 | 3068  |
| F38MOB2  | TS135.2 | 38 | Mom  | AA | NA | Obese      | >6 | 2436  |
| F39T1Ov1 | TS136   | 39 | Twin | AA | DZ | Overweight | >6 | 2962  |
| F39T1Ob2 | TS136.2 | 39 | Twin | AA | DZ | Obese      | >6 | 4164  |
| F39T2Ob1 | TS137   | 39 | Twin | AA | DZ | Obese      | >6 | 3748  |
| F39T2Ob2 | TS137.2 | 39 | Twin | AA | DZ | Obese      | >0 | 2902  |
| F39MOB1  | TS138   | 39 | Mom  | AA | NA | Obese      | >6 | 3289  |
| F39MOB2  | TS138.2 | 39 | Mom  | AA | NA | Obese      | >6 | 1369  |
| F40T1Ob1 | TS139   | 40 | Twin | AA | DZ | Obese      | >6 | 2756  |
| F40T1Ob2 | TS139.2 | 40 | Twin | AA | DZ | Obese      | >6 | 3195  |
| F40T2Ob1 | TS140   | 40 | Twin | AA | DZ | Obese      | >6 | 2698  |
| F40T2Ob2 | TS140.2 | 40 | Twin | AA | DZ | Obese      | >6 | 2851  |
| F40MOB1  | TS141   | 40 | Mom  | AA | NA | Obese      | >6 | 2083  |
| F40MOB2  | TS141.2 | 40 | Mom  | AA | NA | Obese      | >6 | 3125  |
| F41T1Ob1 | TS142   | 41 | Twin | AA | DZ | Obese      | >6 | 2432  |
| F41T1Ob2 | TS142.2 | 41 | Twin | AA | DZ | Obese      | >0 | 3466  |
| F41T2Ob1 | TS143   | 41 | Twin | AA | DZ | Obese      | >6 | 3944  |
| F41T2Ob2 | TS143.2 | 41 | Twin | AA | DZ | Obese      | >6 | 3721  |
| F41MOB1  | TS144   | 41 | Mom  | AA | NA | Obese      | >6 | 2804  |
| F41MOB2  | TS144.2 | 41 | Mom  | AA | NA | Obese      | >6 | 4354  |
| F42T1Ob1 | TS145   | 42 | Twin | AA | DZ | Obese      | >0 | 2738  |
| F42T1Ob2 | TS145.2 | 42 | Twin | AA | DZ | Obese      | >1 | 3633  |
| F42T2Ob1 | TS146   | 42 | Twin | AA | DZ | Obese      | >0 | 3214  |
| F42T2Ob2 | TS146.2 | 42 | Twin | AA | DZ | Obese      | >1 | 3380  |
| F42MOB1  | TS147   | 42 | Mom  | AA | NA | Obese      | >2 | 3513  |
| F42MOv2  | TS147.2 | 42 | Mom  | AA | NA | Overweight | >4 | 4957  |
| F43T1Ob1 | TS148   | 43 | Twin | EA | MZ | Obese      | >6 | 6128  |
| F43T2Ob1 | TS149   | 43 | Twin | EA | MZ | Obese      | >5 | 11555 |
| F43MOB1  | TS150   | 43 | Mom  | EA | NA | Obese      | >6 | 8045  |
| F44T1Ob1 | TS151   | 44 | Twin | AA | DZ | Obese      | >6 | 3800  |
| F44T1Ob2 | TS151.2 | 44 | Twin | AA | DZ | Obese      | >6 | 3210  |
| F44T2Ob1 | TS152   | 44 | Twin | AA | DZ | Obese      | >6 | 3326  |
| F44T2Ob2 | TS152.2 | 44 | Twin | AA | DZ | Obese      | >6 | 2742  |
| F44MOv1  | TS153   | 44 | Mom  | AA | NA | Overweight | >6 | 4118  |
| F45T1Le2 | TS154.2 | 45 | Twin | AA | MZ | Lean       | >6 | 1466  |
| F45T2Le1 | TS155   | 45 | Twin | AA | MZ | Lean       | >6 | 2267  |
| F45T2Le2 | TS155.2 | 45 | Twin | AA | MZ | Lean       | >6 | 2361  |
| F45MOB1  | TS156   | 45 | Mom  | AA | NA | Obese      | >2 | 1694  |
| F45MOB2  | TS156.2 | 45 | Mom  | AA | NA | Obese      | >6 | 1906  |
| F46T1Ob1 | TS160   | 46 | Twin | AA | DZ | Obese      | >6 | 2367  |
| F46T1Ob2 | TS160.2 | 46 | Twin | AA | DZ | Obese      | >6 | 2049  |
| F46T2Ob1 | TS161   | 46 | Twin | AA | DZ | Obese      | >6 | 2185  |
| F46MOB1  | TS162   | 46 | Mom  | AA | NA | Obese      | >6 | 3564  |
| F46MOB2  | TS162.2 | 46 | Mom  | AA | NA | Obese      | >6 | 4041  |
| F47T1Le1 | TS163   | 47 | Twin | AA | MZ | Lean       | >2 | 1624  |
| F47T1Le2 | TS163.2 | 47 | Twin | AA | MZ | Lean       | >3 | 2495  |
| F47T2Le1 | TS164   | 47 | Twin | AA | MZ | Lean       | >6 | 2651  |
| F47T2Le2 | TS164.2 | 47 | Twin | AA | MZ | Lean       | >6 | 3018  |
| F47MLe1  | TS165   | 47 | Mom  | AA | NA | Lean       | >6 | 2767  |
| F47MLe2  | TS165.2 | 47 | Mom  | AA | NA | Lean       | >6 | 2839  |
| F48T1Ob1 | TS166   | 48 | Twin | AA | DZ | Obese      | >2 | 3628  |
| F48T1Ob2 | TS166.2 | 48 | Twin | AA | DZ | Obese      | >6 | 3252  |
| F48T2Ob1 | TS167   | 48 | Twin | AA | DZ | Obese      | >6 | 2822  |
| F48T2Ob2 | TS167.2 | 48 | Twin | AA | DZ | Obese      | >6 | 4538  |
| F48MOB1  | TS168   | 48 | Mom  | AA | NA | Obese      | >6 | 2882  |
| F48MOB2  | TS168.2 | 48 | Mom  | AA | NA | Obese      | >6 | 4569  |
| F49T1Ob1 | TS169   | 49 | Twin | AA | DZ | Obese      | >6 | 4217  |
| F49T1Ob2 | TS169.2 | 49 | Twin | AA | DZ | Obese      | >6 | 3644  |
| F49T2Ob1 | TS170   | 49 | Twin | AA | DZ | Obese      | >3 | 2117  |

|          |         |    |      |    |    |              |    |                |
|----------|---------|----|------|----|----|--------------|----|----------------|
| F49T2Ob2 | TS170.2 | 49 | Twin | AA | DZ | Obese        | >6 | 2785           |
| F50T1Ob1 | TS178   | 50 | Twin | AA | DZ | Obese        | >6 | 2378           |
| F50T1Ob2 | TS178.2 | 50 | Twin | AA | DZ | Obese        | >6 | 2894           |
| F50T2Ob1 | TS179   | 50 | Twin | AA | DZ | Obese        | >6 | 2122           |
| F50T2Ob2 | TS179.2 | 50 | Twin | AA | DZ | Obese        | >6 | 3189           |
| F50MLe1  | TS180   | 50 | Mom  | AA | NA | Lean         | >6 | 2132           |
| F51T1Ob1 | TS181   | 51 | Twin | AA | DZ | Obese        | >3 | 3455           |
| F51T1Ob2 | TS181.2 | 51 | Twin | AA | DZ | Obese        | >6 | 2812           |
| F51T2Ov1 | TS182   | 51 | Twin | AA | DZ | Overweight   | >6 | 7014           |
| F51T2Ob2 | TS182.2 | 51 | Twin | AA | DZ | Obese        | >6 | 6903           |
| F51MOB1  | TS183   | 51 | Mom  | AA | NA | Obese        | >2 | 3243           |
| F51MOB2  | TS183.2 | 51 | Mom  | AA | NA | Obese        | >6 | 2884           |
| F52T1Le1 | TS184   | 52 | Twin | AA | MZ | Lean         | >6 | 1925           |
| F52T2Le1 | TS185   | 52 | Twin | AA | MZ | Lean         | >6 | 2545           |
| F52T2Le2 | TS185.2 | 52 | Twin | AA | MZ | Lean         | >2 | 2538           |
| F52MOv1  | TS186   | 52 | Mom  | AA | NA | Overweight   | >6 | 1735           |
| F53T1Ob1 | TS190   | 53 | Twin | AA | MZ | Obese        | NA | 3165           |
| F53T2Ob1 | TS191   | 53 | Twin | AA | MZ | Obese        | >6 | 2720           |
| F53MOv1  | TS192   | 53 | Mom  | AA | NA | Overweight   | >6 | 5067           |
| F54T1Le1 | TS193   | 54 | Twin | EA | DZ | Lean         | >6 | 1799           |
| F54T1Le2 | TS193.2 | 54 | Twin | EA | DZ | Lean         | >6 | 1739           |
| F54T2Le1 | TS194   | 54 | Twin | EA | DZ | Lean         | >6 | 2291           |
| F54T2Le2 | TS194.2 | 54 | Twin | EA | DZ | Lean         | >6 | 1612           |
| F54MLe1  | TS195   | 54 | Mom  | EA | NA | Lean         | >6 | 2782           |
| F54MLe2  | TS195.2 | 54 | Mom  | EA | NA | Lean         | >6 | 2462           |
|          |         |    |      |    |    | <b>TOTAL</b> |    | <b>1119519</b> |

<sup>a</sup>ID nomenclature: Family number, Twin number or mother, and BMI category (Le=lean, Ov=overweight, Ob=obese; e.g. F1T1Le stands for family 1, twin 1, lean)

<sup>b</sup>Minimum number of months between sampling date and last administration of antibiotics



**Supplementary Table 2: V6 16S rRNA gene sequencing statistics**

| <b>Subject ID<sup>a</sup></b> | <b>Data ID</b> | <b>Twin/Mom</b> | <b>Family</b> | <b>BMI</b>   | <b>Sequences</b> |
|-------------------------------|----------------|-----------------|---------------|--------------|------------------|
| F1T1Le1                       | TS1            | Twin            | 1             | Lean         | 25,140           |
| F1T2Le1                       | TS2            | Twin            | 1             | Lean         | 42,186           |
| F1MOv1                        | TS3            | Mom             | 1             | Overweight   | 17,726           |
| F2T1Le1                       | TS4            | Twin            | 2             | Lean         | 25,705           |
| F2T2Le1                       | TS5            | Twin            | 2             | Lean         | 26,608           |
| F2MOb1                        | TS6            | Mom             | 2             | Obese        | 27,007           |
| F3T1Le1                       | TS7            | Twin            | 3             | Lean         | 17,469           |
| F3T2Le1                       | TS8            | Twin            | 3             | Lean         | 17,170           |
| F3MOv1                        | TS9            | Mom             | 3             | Overweight   | 14,787           |
| F5T1Le1                       | TS13           | Twin            | 5             | Lean         | 15,296           |
| F5T2Le1                       | TS14           | Twin            | 5             | Lean         | 14,220           |
| F5MOv1                        | TS15           | Mom             | 5             | Overweight   | 14,244           |
| F7T1Ob1                       | TS19           | Twin            | 7             | Obese        | 43,635           |
| F7T2Ob1                       | TS20           | Twin            | 7             | Obese        | 13,476           |
| F7MOb1                        | TS21           | Mom             | 7             | Obese        | 23,714           |
| F9T1Le1                       | TS25           | Twin            | 9             | Lean         | 20,491           |
| F9T2Le1                       | TS26           | Twin            | 9             | Lean         | 27,626           |
| F9MOb1                        | TS27           | Mom             | 9             | Obese        | 25,494           |
| F10T1Ob1                      | TS28           | Twin            | 10            | Obese        | 20,905           |
| F10T2Ob1                      | TS29           | Twin            | 10            | Obese        | 15,698           |
| F10MOv1                       | TS30           | Mom             | 10            | Overweight   | 32,083           |
| F11T1Le1                      | TS31           | Twin            | 11            | Lean         | 16,530           |
| F11T2Le1                      | TS32           | Twin            | 11            | Lean         | 31,690           |
| F11MOv1                       | TS33           | Mom             | 11            | Overweight   | 28,962           |
| F15T1Ob1                      | TS49           | Twin            | 15            | Obese        | 22,201           |
| F15T2Ob1                      | TS50           | Twin            | 15            | Obese        | 30,498           |
| F15MOb1                       | TS51           | Mom             | 15            | Obese        | 22,691           |
| F16T1Ob1                      | TS55           | Twin            | 16            | Obese        | 37,027           |
| F16T2Ob1                      | TS56           | Twin            | 16            | Obese        | 31,512           |
| F16MOb1                       | TS57           | Mom             | 16            | Obese        | 30,392           |
| F43T1Ob1                      | TS148          | Twin            | 43            | Obese        | 26,458           |
| F43T2Ob1                      | TS149          | Twin            | 43            | Obese        | 35,838           |
| F43MOb1                       | TS150          | Mom             | 43            | Obese        | 23,463           |
|                               |                |                 |               | <b>TOTAL</b> | <b>817,942</b>   |

<sup>a</sup>ID nomenclature: Family number, Twin number or mother, and BMI category (Le=lean, Ov=overweight, Ob=obese; e.g. F1T1Le stands for family 1, twin 1, lean)

**Supplementary Table 3: Full-length 16S rRNA gene sequencing statistics**

| Subject ID <sup>a</sup> | Data ID | Twin/Mom | Family | BMI          | Sequences |
|-------------------------|---------|----------|--------|--------------|-----------|
| F1T1Le1                 | TS1     | Twin     | 1      | Lean         | 349       |
| F1T2Le1                 | TS2     | Twin     | 1      | Lean         | 351       |
| F1MOv1                  | TS3     | Mom      | 1      | Overweight   | 331       |
| F2T1Le1                 | TS4     | Twin     | 2      | Lean         | 351       |
| F2T2Le1                 | TS5     | Twin     | 2      | Lean         | 345       |
| F2MOb1                  | TS6     | Mom      | 2      | Obese        | 348       |
| F3T1Le1                 | TS7     | Twin     | 3      | Lean         | 237       |
| F3T2Le1                 | TS8     | Twin     | 3      | Lean         | 354       |
| F3MOv1                  | TS9     | Mom      | 3      | Overweight   | 357       |
| F5T1Le1                 | TS13    | Twin     | 5      | Lean         | 337       |
| F5T2Le1                 | TS14    | Twin     | 5      | Lean         | 350       |
| F5MOv1                  | TS15    | Mom      | 5      | Overweight   | 338       |
| F7T1Ob1                 | TS19    | Twin     | 7      | Obese        | 333       |
| F7T2Ob1                 | TS20    | Twin     | 7      | Obese        | 340       |
| F7MOb1                  | TS21    | Mom      | 7      | Obese        | 332       |
| F9T1Le1                 | TS25    | Twin     | 9      | Lean         | 351       |
| F9T2Le1                 | TS26    | Twin     | 9      | Lean         | 252       |
| F9MOb1                  | TS27    | Mom      | 9      | Obese        | 343       |
| F10T1Ob1                | TS28    | Twin     | 10     | Obese        | 344       |
| F10T2Ob1                | TS29    | Twin     | 10     | Obese        | 337       |
| F10MOv1                 | TS30    | Mom      | 10     | Overweight   | 261       |
| F15T1Ob1                | TS49    | Twin     | 15     | Obese        | 338       |
| F15T2Ob1                | TS50    | Twin     | 15     | Obese        | 319       |
| F15MOb1                 | TS51    | Mom      | 15     | Obese        | 331       |
| F16T1Ob1                | TS55    | Twin     | 16     | Obese        | 353       |
| F16T2Ob1                | TS56    | Twin     | 16     | Obese        | 278       |
| F16MOb1                 | TS57    | Mom      | 16     | Obese        | 348       |
| F43T1Ob1                | TS148   | Twin     | 43     | Obese        | 323       |
| F43T2Ob1                | TS149   | Twin     | 43     | Obese        | 340       |
| F43MOb1                 | TS150   | Mom      | 43     | Obese        | 349       |
|                         |         |          |        | <b>TOTAL</b> | 9,920     |

<sup>a</sup>ID nomenclature: Family number, Twin number or mother, and BMI category (Le=lean, Ov=overweight, Ob=obese; e.g. F1T1Le stands for family 1, twin 1, lean)

**Supplementary Table 4: Microbiome sequencing statistics**

| Subject ID <sup>a</sup> | Data ID | Twin/Mom | Family | BMI        | Platform   | Total nt             | Number reads     | Filtered reads <sup>b</sup> | 16S rRNA gene fragments <sup>c</sup> |
|-------------------------|---------|----------|--------|------------|------------|----------------------|------------------|-----------------------------|--------------------------------------|
| F1T1Le1                 | TS1     | Twin     | 1      | Lean       | FLX        | 60,016,519           | 254,044          | 217,386                     | 439                                  |
| F1T2Le1                 | TS2     | Twin     | 1      | Lean       | FLX        | 90,271,969           | 514,022          | 443,640                     | 512                                  |
| F1MOv1                  | TS3     | Mom      | 1      | Overweight | FLX        | 113,506,401          | 571,301          | 510,972                     | 723                                  |
| F2T1Le1                 | TS4     | Twin     | 2      | Lean       | FLX        | 107,008,761          | 472,154          | 414,754                     | 626                                  |
| F2T2Le1                 | TS5     | Twin     | 2      | Lean       | FLX        | 112,835,879          | 553,142          | 490,776                     | 928                                  |
| F2MOb1                  | TS6     | Mom      | 2      | Obese      | FLX        | 135,976,476          | 623,027          | 535,763                     | 1,039                                |
| F3T1Le1                 | TS7     | Twin     | 3      | Lean       | FLX        | 146,946,832          | 607,386          | 555,853                     | 1,188                                |
| F3T2Le1                 | TS8     | Twin     | 3      | Lean       | FLX        | 113,177,766          | 468,769          | 414,497                     | 976                                  |
| F3MOv1                  | TS9     | Mom      | 3      | Overweight | FLX        | 137,564,473          | 552,870          | 499,499                     | 934                                  |
| F7T1Ob1                 | TS19    | Twin     | 7      | Obese      | FLX        | 95,538,760           | 583,989          | 498,880                     | 569                                  |
| F7T2Ob1                 | TS20    | Twin     | 7      | Obese      | FLX        | 108,342,331          | 550,695          | 495,040                     | 829                                  |
| F7MOb1                  | TS21    | Mom      | 7      | Obese      | FLX        | 95,960,723           | 451,177          | 413,772                     | 774                                  |
| F10T1Ob1                | TS28    | Twin     | 10     | Obese      | Titanium   | 138,364,927          | 399,717          | 302,780                     | 652                                  |
| F10T2Ob1                | TS29    | Twin     | 10     | Obese      | Titanium   | 239,971,702          | 672,196          | 502,399                     | 1,190                                |
| F10MOv1                 | TS30    | Mom      | 10     | Overweight | FLX        | 105,932,316          | 564,184          | 495,865                     | 791                                  |
| F15T1Ob1                | TS49    | Twin     | 15     | Obese      | FLX        | 104,449,087          | 596,149          | 519,072                     | 769                                  |
| F15T2Ob1                | TS50    | Twin     | 15     | Obese      | FLX        | 129,037,456          | 642,191          | 549,700                     | 1,209                                |
| F15MOb1                 | TS51    | Mom      | 15     | Obese      | FLX        | 101,531,105          | 557,165          | 434,187                     | 582                                  |
|                         |         |          |        |            | <b>SUM</b> | <b>2,136,433,483</b> | <b>9,634,178</b> | <b>8,294,835</b>            | <b>14,730</b>                        |

<sup>a</sup>ID nomenclature: Family number, Twin number or mom, and BMI category (Le=lean, Ov=overweight, Ob=obese; e.g. F1T1Le stands for family 1, twin 1, lean)

<sup>b</sup>Sequences used after removing low quality, duplicate, and human sequences

<sup>c</sup>16S rRNA gene fragments identified in microbiome sequencing reads

| Supplementary Table 5: Microbiome BLAST statistics <sup>a</sup> |         |                |                |                 |                    |                  |             |             |             |             |             |             |
|-----------------------------------------------------------------|---------|----------------|----------------|-----------------|--------------------|------------------|-------------|-------------|-------------|-------------|-------------|-------------|
| Subject ID                                                      | Data ID | Raw Reads      | Reads Used     | %Sequences used | Nucleotides used   | Mean read-length | %Hsa        | %RDP        | %KEGG       | %STRING     | %NR         | %Gut        |
| F1T1Le1                                                         | TS1     | 254,044        | 217,386        | 85.6            | 51,708,794         | 237.9            | 0.42        | 0.21        | 29.1        | 34.5        | 54.9        | 57.9        |
| F1T2Le1                                                         | TS2     | 514,022        | 443,640        | 86.3            | 78,853,892         | 177.7            | 0.08        | 0.12        | 20.3        | 28.7        | 46.9        | 51.7        |
| F1MOv1                                                          | TS3     | 571,301        | 510,972        | 89.4            | 102,717,417        | 201.0            | 0.16        | 0.15        | 23.8        | 33.6        | 56.5        | 61.2        |
| F2T1Le1                                                         | TS4     | 472,154        | 414,754        | 87.8            | 95,003,113         | 229.1            | 0.14        | 0.15        | 26.2        | 44.5        | 72.3        | 74.9        |
| F2T2Le1                                                         | TS5     | 553,142        | 490,776        | 88.7            | 100,599,979        | 205.0            | 0.22        | 0.19        | 23.0        | 27.8        | 54.1        | 62.1        |
| F2MOb1                                                          | TS6     | 623,027        | 535,763        | 86.0            | 118,207,161        | 220.6            | 0.62        | 0.20        | 26.9        | 37.2        | 58.9        | 62.1        |
| F3T1Le1                                                         | TS7     | 607,386        | 555,853        | 91.5            | 134,889,015        | 242.7            | 0.13        | 0.22        | 26.9        | 34.0        | 58.4        | 61.7        |
| F3T2Le1                                                         | TS8     | 468,769        | 414,497        | 88.4            | 100,520,072        | 242.5            | 0.20        | 0.24        | 28.5        | 35.7        | 61.1        | 64.4        |
| F3MOv1                                                          | TS9     | 552,870        | 499,499        | 90.3            | 124,768,172        | 249.8            | 0.14        | 0.19        | 26.8        | 36.6        | 63.2        | 66.3        |
| F7T1Ob1                                                         | TS19    | 583,989        | 498,880        | 85.4            | 82,117,565         | 164.6            | 0.06        | 0.12        | 19.1        | 30.6        | 52.9        | 57.1        |
| F7T2Ob1                                                         | TS20    | 550,695        | 495,040        | 89.9            | 98,053,098         | 198.1            | 0.32        | 0.17        | 22.3        | 29.3        | 47.2        | 49.9        |
| F7MOb1                                                          | TS21    | 451,177        | 413,772        | 91.7            | 88,786,017         | 214.6            | 0.09        | 0.19        | 25.5        | 37.6        | 62.8        | 66.3        |
| F10T1Ob1                                                        | TS28    | 399,717        | 302,780        | 75.7            | 101,434,082        | 335.0            | 0.06        | 0.36        | 24.5        | 28.4        | 53.2        | 55.5        |
| F10T2Ob1                                                        | TS29    | 672,196        | 502,399        | 74.7            | 173,386,030        | 345.1            | 0.11        | 0.29        | 27.5        | 34.8        | 63.2        | 63.9        |
| F10MOv1                                                         | TS30    | 564,184        | 495,865        | 87.9            | 94,405,318         | 190.4            | 0.21        | 0.16        | 22.4        | 32.0        | 54.7        | 60.7        |
| F15T1Ob1                                                        | TS49    | 596,149        | 519,072        | 87.1            | 91,987,878         | 177.2            | 0.29        | 0.15        | 18.6        | 23.0        | 43.7        | 46.4        |
| F15T2Ob1                                                        | TS50    | 642,191        | 549,700        | 85.6            | 111,999,603        | 203.7            | 0.24        | 0.22        | 24.6        | 29.4        | 51.9        | 57.9        |
| F15MOb1                                                         | TS51    | 557,165        | 434,187        | 77.9            | 81,330,211         | 187.3            | 0.40        | 0.14        | 21.0        | 26.3        | 44.2        | 43.9        |
| <b>Average</b>                                                  |         | <b>535,232</b> | <b>460,824</b> | <b>86.1</b>     | <b>101,709,301</b> | <b>223.5</b>     | <b>0.22</b> | <b>0.19</b> | <b>24.3</b> | <b>32.5</b> | <b>55.6</b> | <b>59.1</b> |
| <b>Sum</b>                                                      |         | 9,634,178      | 8,294,835      | -               | 1,830,767,417      | -                | -           | -           | -           | -           | -           | -           |

<sup>a</sup>Key: %Sequences used=percentage of sequences remaining after removing low quality, duplicate, and human sequences; Hsa=reads matching the H.sapiens genome; %RDP=percentage of reads matching the RDP 16S rRNA database; %KEGG, %STRING, %NR=percentage of reads that were assignable to entries in these various databases; %Gut=percentage of reads assigned to the database of 44 reference genomes

| Supplementary Table 6: Phylotypes shared across ≥70% of all individuals (V2 dataset; 1,000 random sequences/individual) <sup>a</sup> |                            |                                 |                                        |                                                   |                                                  |                                                              |                                                                                      |
|--------------------------------------------------------------------------------------------------------------------------------------|----------------------------|---------------------------------|----------------------------------------|---------------------------------------------------|--------------------------------------------------|--------------------------------------------------------------|--------------------------------------------------------------------------------------|
| Phylotype ID                                                                                                                         | Individuals with phylotype | % of individuals with phylotype | Number of reads grouped into phylotype | Highest relative abundance across all individuals | Lowest relative abundance across all individuals | Mean±sem % of 16S rRNA gene sequences across all individuals | Taxonomic classification <sup>b</sup>                                                |
| 1                                                                                                                                    | 151                        | 98.1                            | 7942                                   | 28.7                                              | 0                                                | 6.53 ± 0.41                                                  | Bacteria; Firmicutes; Clostridia; Faecalibacterium                                   |
| 2                                                                                                                                    | 151                        | 98.1                            | 5375                                   | 25.5                                              | 0                                                | 4.41 ± 0.34                                                  | Bacteria; Firmicutes; Clostridia; Clostridiales; Ruminococcus                        |
| 3                                                                                                                                    | 144                        | 93.5                            | 2518                                   | 14.7                                              | 0                                                | 2.06 ± 0.16                                                  | Bacteria; Firmicutes; Clostridia; Clostridiales                                      |
| 4                                                                                                                                    | 143                        | 92.9                            | 5606                                   | 30.5                                              | 0                                                | 4.56 ± 0.41                                                  | Bacteria; Firmicutes; Clostridia; Clostridiales; Eubacterium rectale                 |
| 5                                                                                                                                    | 140                        | 90.9                            | 1629                                   | 8.1                                               | 0                                                | 1.34 ± 0.11                                                  | Bacteria; Firmicutes; Clostridia; Clostridiales; Clostridium clostridioforme         |
| 6                                                                                                                                    | 134                        | 87.0                            | 757                                    | 12.7                                              | 0                                                | 0.62 ± 0.09                                                  | Bacteria; Firmicutes; Clostridia; Clostridiales; Ruminococcus; Ruminococcus schinkii |
| 7                                                                                                                                    | 133                        | 86.4                            | 1485                                   | 12.2                                              | 0                                                | 1.23 ± 0.14                                                  | Bacteria; Firmicutes; Clostridia; Clostridiales; Coprococcus                         |
| 8                                                                                                                                    | 133                        | 86.4                            | 1392                                   | 6.5                                               | 0                                                | 1.14 ± 0.10                                                  | Bacteria; Firmicutes; Clostridia; Clostridiales                                      |
| 9                                                                                                                                    | 133                        | 86.4                            | 1201                                   | 10.5                                              | 0                                                | 0.99 ± 0.12                                                  | Bacteria; Firmicutes; Clostridia; Clostridiales; Ruminococcus                        |
| 10                                                                                                                                   | 128                        | 83.1                            | 819                                    | 5.2                                               | 0                                                | 0.68 ± 0.06                                                  | Bacteria; Firmicutes; Clostridia; Clostridiales                                      |
| 11                                                                                                                                   | 127                        | 82.5                            | 747                                    | 3.7                                               | 0                                                | 0.62 ± 0.05                                                  | Bacteria; Firmicutes; Clostridia; Faecalibacterium                                   |
| 12                                                                                                                                   | 126                        | 81.8                            | 11598                                  | 51.6                                              | 0                                                | 9.39 ± 0.79                                                  | Bacteria; Bacteroidetes; Bacteroidales; Bacteroidaceae                               |
| 13                                                                                                                                   | 125                        | 81.2                            | 2585                                   | 34.3                                              | 0                                                | 2.15 ± 0.31                                                  | Bacteria; Firmicutes; Clostridia; Faecalibacterium                                   |
| 14                                                                                                                                   | 123                        | 79.9                            | 3512                                   | 15.3                                              | 0                                                | 2.89 ± 0.25                                                  | Bacteria; Firmicutes; Clostridia; Faecalibacterium                                   |
| 15                                                                                                                                   | 120                        | 77.9                            | 792                                    | 8.4                                               | 0                                                | 0.66 ± 0.08                                                  | Bacteria; Firmicutes; Clostridia; Clostridiales; Clostridium nexile                  |
| 16                                                                                                                                   | 118                        | 76.6                            | 632                                    | 2.7                                               | 0                                                | 0.52 ± 0.05                                                  | Bacteria; Firmicutes; Clostridia; Faecalibacterium                                   |
| 17                                                                                                                                   | 115                        | 74.7                            | 3422                                   | 43.3                                              | 0                                                | 2.79 ± 0.41                                                  | Bacteria; Bacteroidetes; Bacteroidales; Bacteroidaceae                               |
| 18                                                                                                                                   | 113                        | 73.4                            | 441                                    | 2.3                                               | 0                                                | 0.37 ± 0.03                                                  | Bacteria; Firmicutes; Clostridia; Clostridiales; Clostridium nexile                  |
| 19                                                                                                                                   | 112                        | 72.7                            | 1168                                   | 17.4                                              | 0                                                | 0.98 ± 0.16                                                  | Bacteria; Firmicutes; Clostridia; Clostridiales; Ruminococcus                        |
| 20                                                                                                                                   | 111                        | 72.1                            | 749                                    | 5.2                                               | 0                                                | 0.61 ± 0.07                                                  | Bacteria; Firmicutes; Clostridia; Clostridiales                                      |
| 21                                                                                                                                   | 108                        | 70.1                            | 640                                    | 3.5                                               | 0                                                | 0.53 ± 0.06                                                  | Bacteria; Firmicutes; Clostridia; Clostridiales; Ruminococcus                        |

<sup>a</sup>1,000 sequences were randomly sampled from a single timepoint for each individual

<sup>b</sup>Based on the consensus taxonomy of ≥90% sequences within each phylotype (best-BLAST-hit against the Greengenes database)

| Supplementary Table 7: Phylotypes shared across >90% of all individuals (V6 dataset; 10,000 random sequences/individual) |                            |                                 |                                        |                                                   |                                                  |                                                              |                                                                                                                  |
|--------------------------------------------------------------------------------------------------------------------------|----------------------------|---------------------------------|----------------------------------------|---------------------------------------------------|--------------------------------------------------|--------------------------------------------------------------|------------------------------------------------------------------------------------------------------------------|
| Phylotype ID                                                                                                             | Individuals with phylotype | % of individuals with phylotype | Number of reads grouped into phylotype | Highest relative abundance across all individuals | Lowest relative abundance across all individuals | Mean±sem % of 16S rRNA gene sequences across all individuals | Taxonomic classification <sup>a</sup>                                                                            |
| 1                                                                                                                        | 33                         | 100.0                           | 10400                                  | 9.7                                               | 0.011                                            | 3.40 ± 0.45                                                  | Bacteria; Firmicutes; Clostridia; Clostridiales; Clostridium_nexile                                              |
| 2                                                                                                                        | 33                         | 100.0                           | 5161                                   | 5.9                                               | 0.011                                            | 1.67 ± 0.23                                                  | Bacteria; Firmicutes; Clostridia; Clostridiales; Clostridium_nexile; Clostridium_fusififormis                    |
| 3                                                                                                                        | 33                         | 100.0                           | 6077                                   | 6.7                                               | 0.021                                            | 1.97 ± 0.32                                                  | Bacteria; Firmicutes; Clostridia; Clostridiales; Ruminococcus                                                    |
| 4                                                                                                                        | 33                         | 100.0                           | 16600                                  | 26.8                                              | 0.011                                            | 5.36 ± 1.02                                                  | Bacteria; Firmicutes; Clostridia; Clostridiales; Eubacterium_rectale                                             |
| 5                                                                                                                        | 33                         | 100.0                           | 11654                                  | 12.5                                              | 0.011                                            | 3.78 ± 0.58                                                  | Bacteria; Firmicutes; Clostridia; Clostridiales; Ruminococcus                                                    |
| 6                                                                                                                        | 32                         | 97.0                            | 3113                                   | 5.8                                               | 0.000                                            | 1.01 ± 0.23                                                  | Bacteria; Firmicutes; Clostridia; Clostridiales; Clostridium_nexile                                              |
| 7                                                                                                                        | 32                         | 97.0                            | 2908                                   | 4.2                                               | 0.000                                            | 0.96 ± 0.21                                                  | Bacteria; Bacteroidetes; Bacteroidales; Bacteroidaceae                                                           |
| 8                                                                                                                        | 32                         | 97.0                            | 2382                                   | 3.7                                               | 0.000                                            | 0.78 ± 0.13                                                  | Bacteria; Firmicutes; Clostridia; Clostridiales; Ruminococcus                                                    |
| 9                                                                                                                        | 32                         | 97.0                            | 1712                                   | 4.4                                               | 0.000                                            | 0.56 ± 0.14                                                  | Bacteria; Firmicutes; Clostridia; Clostridiales; Ruminococcus; Ruminococcus_schinkii                             |
| 10                                                                                                                       | 31                         | 93.9                            | 3940                                   | 6.6                                               | 0.000                                            | 1.29 ± 0.26                                                  | Bacteria; Firmicutes; Clostridia; Faecalibacterium                                                               |
| 11                                                                                                                       | 31                         | 93.9                            | 3729                                   | 4.9                                               | 0.000                                            | 1.21 ± 0.18                                                  | Bacteria; Firmicutes; Clostridia; Clostridiales; Clostridium_nexile                                              |
| 12                                                                                                                       | 30                         | 90.9                            | 454                                    | 0.7                                               | 0.000                                            | 0.15 ± 0.03                                                  | Bacteria; Firmicutes; Clostridia; Clostridiales; Ruminococcus                                                    |
| 13                                                                                                                       | 30                         | 90.9                            | 687                                    | 1.1                                               | 0.000                                            | 0.23 ± 0.04                                                  | Bacteria; Firmicutes; Clostridia                                                                                 |
| 14                                                                                                                       | 30                         | 90.9                            | 999                                    | 2.3                                               | 0.000                                            | 0.33 ± 0.08                                                  | Bacteria; Firmicutes; Clostridia; Peptostreptococcaceae; Peptostreptococcus_anaerobius; Clostridium_bifermentans |
| 15                                                                                                                       | 30                         | 90.9                            | 1241                                   | 5.3                                               | 0.000                                            | 0.40 ± 0.16                                                  | Bacteria; Firmicutes; Clostridia; Clostridiales; Clostridium_bolteae                                             |
| 16                                                                                                                       | 30                         | 90.9                            | 160                                    | 0.2                                               | 0.000                                            | 0.05 ± 0.01                                                  | Bacteria; Actinobacteria; Actinobacteridae; Actinomycineae                                                       |
| 17                                                                                                                       | 30                         | 90.9                            | 1417                                   | 2.0                                               | 0.000                                            | 0.46 ± 0.09                                                  | Bacteria; Firmicutes; Clostridia; Clostridiales; Ruminococcus                                                    |
| 18                                                                                                                       | 30                         | 90.9                            | 1014                                   | 1.2                                               | 0.000                                            | 0.33 ± 0.06                                                  | Bacteria; Firmicutes; Clostridia; Clostridiales                                                                  |
| 19                                                                                                                       | 30                         | 90.9                            | 1353                                   | 1.6                                               | 0.000                                            | 0.44 ± 0.08                                                  | Bacteria; Firmicutes; Clostridia; Clostridiales; Ruminococcus; Ruminococcus_luti                                 |
| 20                                                                                                                       | 30                         | 90.9                            | 2686                                   | 6.0                                               | 0.000                                            | 0.88 ± 0.22                                                  | Bacteria; Firmicutes; Clostridia; Clostridiales; Clostridium_clostridioforme                                     |
| 21                                                                                                                       | 30                         | 90.9                            | 7454                                   | 12.2                                              | 0.000                                            | 2.43 ± 0.63                                                  | Bacteria; Firmicutes; Clostridia; Faecalibacterium                                                               |

<sup>a</sup>Based on the consensus taxonomy of ≥90% sequences within each phylotype (best-BLAST-hit against the Greengenes database)

| Supplementary Table 8: Phylotypes shared across ≥70% of all individuals (Full-length dataset; 200 random sequences/individual) |                            |                                 |                                        |                                                   |                                                  |                                                              |                                                                                             |
|--------------------------------------------------------------------------------------------------------------------------------|----------------------------|---------------------------------|----------------------------------------|---------------------------------------------------|--------------------------------------------------|--------------------------------------------------------------|---------------------------------------------------------------------------------------------|
| Phylotype ID                                                                                                                   | Individuals with phylotype | % of individuals with phylotype | Number of reads grouped into phylotype | Highest relative abundance across all individuals | Lowest relative abundance across all individuals | Mean±sem % of 16S rRNA gene sequences across all individuals | Taxonomic classification <sup>a</sup>                                                       |
| 1                                                                                                                              | 28                         | 93.3                            | 378                                    | 17.9                                              | 0.0                                              | 7.81 ± 1.04                                                  | Bacteria; Firmicutes; Clostridia; Faecalibacterium                                          |
| 2                                                                                                                              | 27                         | 90.0                            | 347                                    | 25.0                                              | 0.0                                              | 6.90 ± 1.20                                                  | Bacteria; Firmicutes; Clostridia; Clostridiales; Ruminococcus                               |
| 3                                                                                                                              | 26                         | 86.7                            | 128                                    | 9.9                                               | 0.0                                              | 2.62 ± 0.47                                                  | Bacteria; Firmicutes; Clostridia; Clostridiales                                             |
| 4                                                                                                                              | 26                         | 86.7                            | 298                                    | 23.1                                              | 0.0                                              | 6.00 ± 1.14                                                  | Bacteria; Firmicutes; Clostridia; Clostridiales; Eubacterium_rectale                        |
| 5                                                                                                                              | 26                         | 86.7                            | 127                                    | 12.0                                              | 0.0                                              | 2.64 ± 0.49                                                  | Bacteria; Firmicutes; Clostridia; Clostridiales; Clostridium_clostridioforme                |
| 6                                                                                                                              | 22                         | 73.3                            | 110                                    | 10.9                                              | 0.0                                              | 2.33 ± 0.55                                                  | Bacteria; Bacteroidetes; Bacteroidales; Bacteroidaceae                                      |
| 7                                                                                                                              | 22                         | 73.3                            | 87                                     | 5.7                                               | 0.0                                              | 1.76 ± 0.29                                                  | Bacteria; Firmicutes; Clostridia; Clostridiales; Clostridium_nexile; Clostridium_fusiformis |
| 8                                                                                                                              | 21                         | 70.0                            | 112                                    | 11.9                                              | 0.0                                              | 2.32 ± 0.49                                                  | Bacteria; Firmicutes; Clostridia; Clostridiales; Coprococcus                                |
| 9                                                                                                                              | 21                         | 70.0                            | 75                                     | 6.9                                               | 0.0                                              | 1.53 ± 0.32                                                  | Bacteria; Firmicutes; Clostridia; Clostridiales; Clostridium_nexile                         |
| 10                                                                                                                             | 21                         | 70.0                            | 54                                     | 5.7                                               | 0.0                                              | 1.14 ± 0.23                                                  | Bacteria; Firmicutes; Clostridia; Clostridiales; Clostridium_nexile                         |

<sup>a</sup>Based on the consensus taxonomy of ≥90% sequences within each phylotype (best-BLAST-hit against the Greengenes database)

| Supplementary Table 9: Phylum-level taxonomic assignments <sup>a</sup> |                 |       |      |    |       |      |    |
|------------------------------------------------------------------------|-----------------|-------|------|----|-------|------|----|
|                                                                        |                 | lean  |      |    | obese |      |    |
|                                                                        |                 | mean  | sem  | N  | mean  | sem  | N  |
| V2 (EA)                                                                | %Bacteroidetes  | 26.76 | 2.46 | 26 | 24.39 | 1.89 | 42 |
|                                                                        | %Firmicutes     | 71.48 | 2.50 | 26 | 72.57 | 1.92 | 42 |
|                                                                        | %Actinobacteria | 0.72  | 0.14 | 26 | 1.70  | 0.58 | 42 |
| V2 (AA) <sup>b</sup>                                                   | %Bacteroidetes  | 37.52 | 3.05 | 8  | 29.41 | 1.49 | 62 |
|                                                                        | %Firmicutes     | 60.74 | 3.04 | 8  | 68.14 | 1.42 | 62 |
|                                                                        | %Actinobacteria | 0.97  | 0.40 | 8  | 1.27  | 0.21 | 62 |
| V6 (EA)                                                                | %Bacteroidetes  | 6.85  | 1.25 | 12 | 3.15  | 0.93 | 16 |
|                                                                        | %Firmicutes     | 81.72 | 2.41 | 12 | 75.99 | 4.60 | 16 |
|                                                                        | %Actinobacteria | 7.14  | 1.76 | 12 | 17.91 | 5.01 | 16 |
| Full-length (EA)                                                       | %Bacteroidetes  | 11.44 | 2.77 | 10 | 7.58  | 2.35 | 16 |
|                                                                        | %Firmicutes     | 83.50 | 2.28 | 10 | 84.60 | 3.03 | 16 |
|                                                                        | %Actinobacteria | 2.78  | 0.78 | 10 | 4.41  | 1.14 | 16 |
| BLAST (EA) <sup>c</sup>                                                | %Bacteroidetes  | 42.60 | 8.75 | 6  | 34.69 | 8.16 | 9  |
|                                                                        | %Firmicutes     | 51.54 | 8.35 | 6  | 51.25 | 5.47 | 9  |
|                                                                        | %Actinobacteria | 2.07  | 0.33 | 6  | 10.34 | 3.35 | 9  |

<sup>a</sup>A subset of each dataset was included in the analysis: 10,000 sequences/sample (V6), 1,000 sequences/sample (V2) and 200 sequences/sample (full-length). Sequences from the same individual across both timepoints were pooled.

<sup>b</sup>The AA lean individuals surveyed have significantly more Bacteroidetes and less Firmicutes than the lean EA individuals ( $p < 0.05$ , Student's t-test)

<sup>c</sup>BLASTX comparisons between microbiomes and NCBI non-redundant database



| Supplementary Table 10: Relative abundance of CAZymes across 18 gut microbiomes (% of sequence assignments across all identified CAZymes) <sup>a</sup> |              |              |              |              |              |              |              |              |              |              |              |              |              |              |              |              |              |              |
|--------------------------------------------------------------------------------------------------------------------------------------------------------|--------------|--------------|--------------|--------------|--------------|--------------|--------------|--------------|--------------|--------------|--------------|--------------|--------------|--------------|--------------|--------------|--------------|--------------|
| Subject ID <sup>b</sup>                                                                                                                                | F1T1Le       | F1T2Le       | F1MOv        | F2T1Le       | F2T2Le       | F2MOb        | F3T1Le       | F3T2Le       | F3MOv        | F4T1Ob       | F4T2Ob       | F4MOb        | F5T1Ob       | F5T2Ob       | F5MOv        | F6T1Ob       | F6T2Ob       | F6MOb        |
| <b>Glycoside hydrolases</b>                                                                                                                            | <b>70.56</b> | <b>73.96</b> | <b>72.14</b> | <b>72.40</b> | <b>68.38</b> | <b>67.37</b> | <b>68.69</b> | <b>67.84</b> | <b>69.92</b> | <b>73.46</b> | <b>70.45</b> | <b>71.57</b> | <b>64.19</b> | <b>69.11</b> | <b>69.96</b> | <b>68.15</b> | <b>69.61</b> | <b>71.50</b> |
| GH13                                                                                                                                                   | 8.96         | 6.31         | 6.37         | 3.97         | 10.78        | 8.04         | 8.63         | 9.97         | 8.02         | 4.68         | 8.36         | 6.37         | 11.17        | 11.80        | 7.05         | 12.34        | 16.84        | 11.19        |
| GH2                                                                                                                                                    | 7.40         | 7.10         | 7.01         | 6.51         | 5.13         | 5.49         | 5.81         | 6.02         | 5.94         | 6.43         | 6.53         | 6.53         | 5.52         | 5.40         | 5.93         | 5.69         | 5.64         | 6.21         |
| GH43                                                                                                                                                   | 3.48         | 5.78         | 5.63         | 6.61         | 4.39         | 4.69         | 5.05         | 4.14         | 5.75         | 5.80         | 6.49         | 5.00         | 4.34         | 6.57         | 5.04         | 5.05         | 5.59         | 4.56         |
| GH92                                                                                                                                                   | 3.44         | 6.25         | 5.00         | 7.70         | 3.25         | 5.47         | 3.28         | 2.65         | 4.50         | 7.66         | 4.36         | 6.72         | 1.71         | 1.73         | 5.70         | 1.93         | 0.60         | 3.59         |
| GH3                                                                                                                                                    | 5.72         | 5.37         | 4.31         | 4.47         | 3.20         | 3.94         | 4.03         | 4.70         | 4.09         | 3.46         | 3.77         | 4.27         | 3.89         | 5.07         | 3.75         | 3.75         | 4.29         | 3.41         |
| GH97                                                                                                                                                   | 1.97         | 5.45         | 4.01         | 4.67         | 1.18         | 3.38         | 3.51         | 2.23         | 3.91         | 4.06         | 3.95         | 3.62         | 0.96         | 1.25         | 3.96         | 1.22         | 0.28         | 1.87         |
| GH31                                                                                                                                                   | 2.98         | 2.48         | 2.53         | 2.41         | 3.84         | 2.11         | 2.16         | 3.04         | 2.13         | 2.67         | 2.06         | 2.49         | 2.86         | 3.37         | 2.52         | 2.81         | 3.99         | 2.79         |
| GH20                                                                                                                                                   | 2.40         | 2.30         | 2.35         | 3.34         | 1.93         | 2.93         | 1.99         | 1.92         | 2.19         | 3.33         | 2.45         | 3.32         | 1.09         | 1.17         | 3.12         | 1.66         | 0.92         | 3.18         |
| GH29                                                                                                                                                   | 1.99         | 1.51         | 2.12         | 2.54         | 2.94         | 2.52         | 2.53         | 2.19         | 1.83         | 3.93         | 1.53         | 3.31         | 1.80         | 1.47         | 2.59         | 1.51         | 0.93         | 1.81         |
| GH77                                                                                                                                                   | 2.13         | 1.39         | 1.43         | 0.86         | 2.18         | 2.18         | 2.18         | 2.45         | 1.99         | 1.32         | 1.95         | 1.49         | 2.87         | 2.95         | 1.62         | 2.64         | 3.47         | 2.04         |
| GH28                                                                                                                                                   | 1.58         | 2.44         | 3.71         | 3.07         | 1.46         | 2.24         | 2.25         | 1.79         | 2.00         | 2.63         | 1.99         | 2.49         | 1.64         | 1.01         | 2.31         | 1.44         | 0.54         | 1.11         |
| GH51                                                                                                                                                   | 1.18         | 1.51         | 1.38         | 1.44         | 2.12         | 1.58         | 1.73         | 1.68         | 1.31         | 1.73         | 2.29         | 1.51         | 1.80         | 2.74         | 1.40         | 1.71         | 2.34         | 1.60         |
| GH36                                                                                                                                                   | 1.62         | 1.12         | 1.19         | 0.99         | 1.80         | 1.23         | 1.64         | 2.02         | 1.37         | 1.24         | 1.79         | 1.39         | 1.52         | 1.92         | 1.28         | 2.20         | 2.63         | 2.37         |
| GH1                                                                                                                                                    | 1.51         | 0.87         | 1.02         | 0.34         | 2.90         | 1.08         | 1.50         | 1.50         | 1.67         | 0.72         | 0.79         | 0.71         | 2.01         | 2.50         | 1.35         | 3.74         | 2.29         | 2.25         |
| GH5                                                                                                                                                    | 1.95         | 2.41         | 1.75         | 1.53         | 1.07         | 0.98         | 2.62         | 1.45         | 1.95         | 1.37         | 2.56         | 1.30         | 1.29         | 1.37         | 0.90         | 0.84         | 1.22         | 0.95         |
| GH42                                                                                                                                                   | 0.91         | 0.49         | 0.83         | 0.90         | 2.43         | 0.62         | 1.09         | 1.10         | 1.03         | 0.94         | 0.44         | 0.98         | 1.80         | 2.82         | 0.93         | 2.26         | 3.87         | 2.06         |
| GH105                                                                                                                                                  | 1.56         | 1.65         | 2.07         | 2.07         | 1.01         | 1.38         | 1.46         | 1.27         | 1.83         | 1.77         | 0.83         | 1.63         | 0.95         | 0.50         | 1.65         | 0.98         | 0.39         | 0.83         |
| GH95                                                                                                                                                   | 1.56         | 1.18         | 1.36         | 1.24         | 0.91         | 1.21         | 1.22         | 1.04         | 0.99         | 1.33         | 1.90         | 1.12         | 0.68         | 0.75         | 1.35         | 1.01         | 0.48         | 1.44         |
| GH32                                                                                                                                                   | 0.91         | 0.61         | 0.70         | 0.75         | 2.12         | 1.18         | 1.05         | 0.91         | 0.84         | 0.99         | 1.15         | 0.82         | 1.15         | 1.52         | 0.99         | 1.47         | 2.04         | 1.00         |
| GH78                                                                                                                                                   | 1.91         | 1.09         | 1.22         | 1.61         | 0.60         | 0.70         | 1.05         | 0.89         | 1.25         | 1.43         | 1.45         | 0.98         | 1.03         | 1.39         | 0.80         | 0.90         | 0.58         | 1.21         |
| <b>Glycosyltransferases</b>                                                                                                                            | <b>20.25</b> | <b>17.20</b> | <b>17.49</b> | <b>16.26</b> | <b>23.34</b> | <b>21.64</b> | <b>22.09</b> | <b>22.78</b> | <b>19.66</b> | <b>16.68</b> | <b>20.34</b> | <b>18.24</b> | <b>26.36</b> | <b>23.15</b> | <b>19.53</b> | <b>23.54</b> | <b>23.99</b> | <b>21.50</b> |
| GT2                                                                                                                                                    | 5.66         | 6.26         | 6.31         | 5.58         | 7.68         | 7.91         | 7.14         | 7.48         | 7.39         | 6.19         | 6.80         | 6.97         | 9.41         | 9.80         | 6.74         | 7.98         | 7.14         | 6.78         |
| GT4                                                                                                                                                    | 3.55         | 3.76         | 3.96         | 4.44         | 4.93         | 4.43         | 4.64         | 4.60         | 4.20         | 4.17         | 3.99         | 4.08         | 5.62         | 4.43         | 4.50         | 4.42         | 4.18         | 4.80         |
| GT35                                                                                                                                                   | 4.75         | 2.47         | 2.07         | 1.62         | 4.75         | 2.85         | 3.58         | 3.91         | 2.90         | 1.81         | 2.76         | 2.13         | 4.50         | 3.78         | 2.59         | 4.42         | 5.25         | 3.66         |
| GT28                                                                                                                                                   | 1.51         | 0.85         | 0.89         | 0.53         | 1.51         | 1.00         | 1.34         | 1.48         | 1.00         | 0.58         | 0.94         | 0.83         | 1.31         | 1.00         | 1.01         | 1.48         | 2.12         | 1.33         |
| GT5                                                                                                                                                    | 1.74         | 0.77         | 0.79         | 0.33         | 1.72         | 0.81         | 1.38         | 1.62         | 1.15         | 0.46         | 0.83         | 0.65         | 1.54         | 1.24         | 0.96         | 1.74         | 1.90         | 0.96         |
| GT51                                                                                                                                                   | 0.77         | 0.78         | 0.75         | 0.74         | 0.99         | 1.08         | 0.92         | 1.17         | 0.80         | 0.68         | 1.06         | 0.72         | 1.82         | 1.27         | 0.88         | 1.06         | 1.63         | 1.02         |
| <b>Carbohydrate binding modules</b>                                                                                                                    | <b>1.76</b>  | <b>2.40</b>  | <b>2.15</b>  | <b>2.02</b>  | <b>2.05</b>  | <b>2.22</b>  | <b>2.38</b>  | <b>2.25</b>  | <b>2.11</b>  | <b>1.90</b>  | <b>2.06</b>  | <b>2.15</b>  | <b>2.66</b>  | <b>2.88</b>  | <b>2.08</b>  | <b>2.22</b>  | <b>2.28</b>  | <b>1.98</b>  |
| <b>Carbohydrate esterases</b>                                                                                                                          | <b>5.89</b>  | <b>4.70</b>  | <b>5.45</b>  | <b>5.53</b>  | <b>5.00</b>  | <b>5.81</b>  | <b>5.64</b>  | <b>5.36</b>  | <b>6.04</b>  | <b>5.19</b>  | <b>5.19</b>  | <b>5.02</b>  | <b>5.24</b>  | <b>3.94</b>  | <b>6.01</b>  | <b>4.68</b>  | <b>3.84</b>  | <b>4.15</b>  |
| CE4                                                                                                                                                    | 1.53         | 1.01         | 1.03         | 0.78         | 1.41         | 1.04         | 1.16         | 1.27         | 1.20         | 0.73         | 0.84         | 0.92         | 1.35         | 0.96         | 1.04         | 1.31         | 1.51         | 0.91         |
| <b>Polysaccharide lyases</b>                                                                                                                           | <b>1.55</b>  | <b>1.74</b>  | <b>2.77</b>  | <b>3.79</b>  | <b>1.22</b>  | <b>2.95</b>  | <b>1.20</b>  | <b>1.78</b>  | <b>2.27</b>  | <b>2.78</b>  | <b>1.95</b>  | <b>3.02</b>  | <b>1.55</b>  | <b>0.93</b>  | <b>2.43</b>  | <b>1.43</b>  | <b>0.28</b>  | <b>0.87</b>  |

<sup>a</sup>Groups found at an average relative abundance >1% are shown

<sup>b</sup>ID nomenclature: Family number, Twin number or mother, and BMI category (Le=lean, Ov=overweight, Ob=obese; e.g. F1T1Le stands for family 1, twin 1, lean)

**Supplementary Table 11: Relative abundance of metabolic pathways in the gut microbiome (% of KEGG assignments)<sup>a</sup>**

| <b>KEGG metabolic pathway</b>                          | <b>Mean<math>\pm</math>sem across all 18 microbiomes</b> |
|--------------------------------------------------------|----------------------------------------------------------|
| Transporters                                           | 4.93 $\pm$ 0.21                                          |
| Other replication, recombination and repair proteins   | 3.35 $\pm$ 0.04                                          |
| ABC transporters                                       | 3.24 $\pm$ 0.13                                          |
| General function prediction only                       | 2.60 $\pm$ 0.06                                          |
| Purine metabolism                                      | 2.29 $\pm$ 0.02                                          |
| Other enzymes                                          | 2.16 $\pm$ 0.03                                          |
| Aminoacyl-tRNA biosynthesis                            | 2.14 $\pm$ 0.05                                          |
| Glutamate metabolism                                   | 1.98 $\pm$ 0.03                                          |
| Starch and sucrose metabolism                          | 1.92 $\pm$ 0.03                                          |
| Pyruvate metabolism                                    | 1.73 $\pm$ 0.02                                          |
| Pyrimidine metabolism                                  | 1.70 $\pm$ 0.02                                          |
| Peptidases                                             | 1.69 $\pm$ 0.05                                          |
| Alanine and aspartate metabolism                       | 1.58 $\pm$ 0.02                                          |
| Glycine, serine and threonine metabolism               | 1.53 $\pm$ 0.02                                          |
| Other translation proteins                             | 1.37 $\pm$ 0.02                                          |
| Galactose metabolism                                   | 1.37 $\pm$ 0.03                                          |
| Glycolysis / Gluconeogenesis                           | 1.35 $\pm$ 0.02                                          |
| Other ion-coupled transporters                         | 1.34 $\pm$ 0.06                                          |
| Fructose and mannose metabolism                        | 1.31 $\pm$ 0.03                                          |
| Two-component system                                   | 1.31 $\pm$ 0.03                                          |
| Ribosome                                               | 1.27 $\pm$ 0.03                                          |
| Replication complex                                    | 1.18 $\pm$ 0.02                                          |
| Phenylalanine, tyrosine and tryptophan biosynthesis    | 1.17 $\pm$ 0.02                                          |
| Valine, leucine and isoleucine biosynthesis            | 1.15 $\pm$ 0.02                                          |
| Carbon fixation                                        | 1.15 $\pm$ 0.01                                          |
| Nitrogen metabolism                                    | 1.13 $\pm$ 0.02                                          |
| Glycerolipid metabolism                                | 1.07 $\pm$ 0.02                                          |
| Oxidative phosphorylation                              | 1.07 $\pm$ 0.03                                          |
| Butanoate metabolism                                   | 1.05 $\pm$ 0.02                                          |
| Chaperones and folding catalysts                       | 0.99 $\pm$ 0.01                                          |
| Pentose phosphate pathway                              | 0.95 $\pm$ 0.01                                          |
| Tyrosine metabolism                                    | 0.95 $\pm$ 0.02                                          |
| Histidine metabolism                                   | 0.92 $\pm$ 0.02                                          |
| Cell division                                          | 0.91 $\pm$ 0.01                                          |
| Aminosugars metabolism                                 | 0.89 $\pm$ 0.03                                          |
| Arginine and proline metabolism                        | 0.85 $\pm$ 0.01                                          |
| Citrate cycle (TCA cycle)                              | 0.84 $\pm$ 0.02                                          |
| Methionine metabolism                                  | 0.83 $\pm$ 0.02                                          |
| Lysine biosynthesis                                    | 0.82 $\pm$ 0.01                                          |
| RNA polymerase                                         | 0.81 $\pm$ 0.02                                          |
| Reductive carboxylate cycle (CO <sub>2</sub> fixation) | 0.80 $\pm$ 0.03                                          |
| Propanoate metabolism                                  | 0.80 $\pm$ 0.01                                          |
| Peptidoglycan biosynthesis                             | 0.79 $\pm$ 0.01                                          |
| N-Glycan degradation                                   | 0.78 $\pm$ 0.05                                          |
| Urea cycle and metabolism of amino groups              | 0.78 $\pm$ 0.01                                          |
| Translation factors                                    | 0.78 $\pm$ 0.02                                          |
| Selenoamino acid metabolism                            | 0.77 $\pm$ 0.02                                          |
| Glyoxylate and dicarboxylate metabolism                | 0.73 $\pm$ 0.01                                          |
| DNA polymerase                                         | 0.72 $\pm$ 0.01                                          |
| Pentose and glucuronate interconversions               | 0.70 $\pm$ 0.02                                          |
| Cysteine metabolism                                    | 0.68 $\pm$ 0.02                                          |
| Pantothenate and CoA biosynthesis                      | 0.67 $\pm$ 0.01                                          |
| Nucleotide sugars metabolism                           | 0.67 $\pm$ 0.02                                          |
| Glycosaminoglycan degradation                          | 0.66 $\pm$ 0.04                                          |
| Function unknown                                       | 0.66 $\pm$ 0.01                                          |
| One carbon pool by folate                              | 0.65 $\pm$ 0.01                                          |
| Sphingolipid metabolism                                | 0.64 $\pm$ 0.03                                          |
| Protein export                                         | 0.62 $\pm$ 0.01                                          |

<sup>a</sup>Pathways with an average relative abundance of >0.6% are shown

**Supplementary Table 12: KEGG Pathways enriched or depleted in the distal gut microbiome of obese twins<sup>a</sup>**

|                 |                                           |
|-----------------|-------------------------------------------|
| <b>Enriched</b> | Fatty acid biosynthesis                   |
|                 | Nicotinate and nicotinamide metabolism    |
|                 | Other ion-coupled transporters            |
|                 | Other transporters                        |
|                 | Pentose and glucuronate interconversions  |
|                 | Phosphotransferase system (PTS)           |
|                 | Protein folding and associated processing |
|                 | Signal transduction mechanisms            |
|                 | Transcription factors                     |
| <b>Depleted</b> | Bacterial chemotaxis                      |
|                 | Bacterial motility proteins               |
|                 | Benzoate degradation via CoA ligation     |
|                 | Butanoate metabolism                      |
|                 | Citrate cycle (TCA cycle)                 |
|                 | Glycosaminoglycan degradation             |
|                 | Other enzymes                             |
|                 | Oxidative phosphorylation                 |
|                 | Pyruvate/Oxoglutarate oxidoreductases     |
|                 | Starch and sucrose metabolism             |
|                 | Tryptophan metabolism                     |

<sup>a</sup>Identified by comparing KEGG pathway abundance in the variable component of the fecal microbiomes of obese versus lean MZ twins using a bootstrap algorithm ( $p < 0.01$ )

**Supplementary Table 13: Bacterial genes enriched in the gut microbiomes of obese MZ twins**

| Genome and NCBI proteinID*             | Annotation                                                                  | COG       | COG Categories | KEGG orthologous groups |
|----------------------------------------|-----------------------------------------------------------------------------|-----------|----------------|-------------------------|
| Bifidobacterium adolescentis 154486403 | tRNA-ribosyltransferase                                                     | COG0343   | J              | K00773                  |
| Bifidobacterium longum 23465114        | Transcriptional regulators                                                  | COG1609   | K              |                         |
| Bifidobacterium longum 23466186        | ABC-type sugar transport system, periplasmic component                      | COG1653   | G              |                         |
| Bifidobacterium adolescentis 154488903 | Superfamily I DNA and RNA helicases                                         | COG3973   | R              |                         |
| Bifidobacterium adolescentis 154486727 | DNA polymerase IV                                                           | COG0389   | L              | K02346                  |
| Bifidobacterium adolescentis 154488882 | peptide/nickel transport system ATP-binding protein                         | COG1123   | R              | K02031/2                |
| Bifidobacterium adolescentis 154488633 | Trk-type K <sup>+</sup> transport systems                                   | COG0168   | P              |                         |
| Bifidobacterium adolescentis 154488131 | Asp-tRNA <sup>Asn</sup> /Glu-tRNA <sup>Gln</sup> amidotransferase B subunit | COG0064   | J              | K02434                  |
| Bifidobacterium adolescentis 154487571 | Threonine dehydratase                                                       | COG1171   | E              | K01754                  |
| Bifidobacterium adolescentis 154486641 | Glucose-6-phosphate isomerase                                               | COG0166   | G              | K01810                  |
| Bifidobacterium adolescentis 154488790 | ATP-dependent helicase Lhr and Lhr-like helicase                            | COG1201   | R              | K03724                  |
| Bifidobacterium adolescentis 119025482 | Predicted ATPase involved in cell division                                  | COG2884   | D              | K09812                  |
| Bifidobacterium adolescentis 154486531 | Predicted phosphohydrolases                                                 | COG1409   | R              |                         |
| Bifidobacterium adolescentis 154486606 | tRNA-(guanine-N1)-methyltransferase                                         | COG0336   | J              | K00554                  |
| Bifidobacterium adolescentis 154486895 | IMP dehydrogenase/GMP reductase                                             | COG0516/7 | FR             | K00088                  |
| Bifidobacterium adolescentis 154486720 | Aspartate/tyrosine/aromatic aminotransferase                                | COG0436   | E              | K00812                  |
| Bifidobacterium adolescentis 119026599 | Cation transport ATPase                                                     | COG0474   | P              | K01529                  |
| Bifidobacterium adolescentis 154486334 | hypothetical protein                                                        |           |                |                         |
| Bifidobacterium adolescentis 119025743 | NAD/NADP transhydrogenase alpha subunit                                     | COG3288   | C              | K00324                  |
| Bifidobacterium longum 23336617        | UspA and related nucleotide-binding proteins                                | COG0589   | T              |                         |
| Bifidobacterium adolescentis 154486937 | ABC-type sugar transport system                                             | COG1653   | G              | K02027                  |
| Bifidobacterium longum 23465912        | hypothetical protein                                                        |           |                |                         |
| Bifidobacterium longum 23335963        | K <sup>+</sup> transporter                                                  | COG3158   | P              | K03549                  |
| Bifidobacterium adolescentis 119025729 | ABC-type transport system, Fe-S cluster assembly                            | COG0719   | O              |                         |
| Bifidobacterium adolescentis 154487396 | Glutamine synthetase adenyltransferase                                      | COG1391   | OT             | K00982                  |
| Bifidobacterium adolescentis 154488156 | hypothetical protein                                                        |           |                |                         |
| Bifidobacterium adolescentis 154486668 | Acetyl/propionyl-CoA carboxylase                                            | COG4770   | I              | K01946                  |
| Bifidobacterium adolescentis 154487299 | Nuclease subunit of the excinuclease complex                                | COG0322   | L              | K03703                  |
| Bifidobacterium longum 23465540        | Acetate kinase                                                              | COG0282   | C              | K00925                  |
| Clostridium bartlettii 164687465       | putative conjugative transposon protein                                     | NOG13238  |                |                         |
| Bifidobacterium longum 23465037        | Dipeptidase                                                                 | COG4690   | E              | K08659                  |
| Bifidobacterium adolescentis 154488210 | Predicted hydrolase of the metallo-beta-lactamase superfamily               | COG0595   | R              | K07021                  |
| Bifidobacterium adolescentis 154487598 | tRNA/rRNA methyltransferase protein                                         |           |                | K00599                  |
| Bifidobacterium adolescentis 119025149 | hypothetical protein                                                        |           |                |                         |
| Bifidobacterium adolescentis 154487052 | hypothetical protein                                                        | NOG07592  |                |                         |
| Bifidobacterium adolescentis 154486554 | PTS system, enzyme I                                                        |           |                | K00935                  |
| Bifidobacterium longum 23335005        | Selenocysteine lyase                                                        | COG0520   | E              | K01763                  |
| Bifidobacterium longum 23465294        | Branched-chain amino acid permeases                                         | COG1114   | E              | K03311                  |
| Bifidobacterium adolescentis 119025432 | Acyl-CoA thioesterase                                                       | COG1946   | I              | K01076                  |
| Bifidobacterium adolescentis 154486528 | Aspartate-semialdehyde dehydrogenase                                        | COG0136   | E              | K00133                  |
| Bifidobacterium adolescentis 154487076 | Predicted ATPase with chaperone activity                                    | COG0606   | O              | K07391                  |
| Bifidobacterium longum 23466221        | Alcohol dehydrogenase, class IV                                             | COG1454   | C              | K00048                  |
| Bifidobacterium adolescentis 119025541 | Phosphoribosylformylglycinamide synthase                                    | COG0046/7 | F              | K01952                  |
| Bifidobacterium adolescentis 119026031 | Geranylgeranyl pyrophosphate synthase                                       | COG0142   | H              |                         |
| Bifidobacterium longum 23465502        | Signal transduction histidine kinase                                        | COG4585   | T              |                         |
| Bifidobacterium adolescentis 154486631 | Predicted metal-binding, possibly nucleic acid-binding protein              | COG1399   | R              |                         |
| Bifidobacterium adolescentis 154488013 | Sugar (pentulose and hexulose) kinases                                      | COG1070   | G              | K00853                  |
| Bifidobacterium adolescentis 119025777 | Aspartate carbamoyltransferase                                              | COG0540   | F              | K00609                  |
| Bifidobacterium adolescentis 119025510 | Superfamily II DNA helicase                                                 | COG0514   | L              | K03654                  |
| Bifidobacterium adolescentis 119026360 | Protease II                                                                 | COG1770   | E              | K01354                  |
| Bifidobacterium adolescentis 119025672 | Signal transduction histidine kinase                                        | COG3920   | T              |                         |
| Bifidobacterium adolescentis 154487392 | Orotidine-5'-phosphate decarboxylase                                        | COG0284   | F              | K01591                  |
| Bifidobacterium adolescentis 154487114 | Permeases of the major facilitator superfamily                              | COG0477   | GEPR           |                         |
| Bifidobacterium adolescentis 119025804 | Predicted Fe-S-cluster redox enzyme                                         | COG0820   | R              | K06941                  |
| Bifidobacterium longum 23465197        | Permeases of the major facilitator superfamily                              | COG0477   | GEPR           |                         |
| Bifidobacterium adolescentis 154487064 | Superfamily II RNA helicase                                                 | COG4581   | L              | K01529                  |
| Bifidobacterium longum 23465727        | ABC-type dipeptide transport system                                         | COG0747   | E              | K02035                  |
| Bifidobacterium adolescentis 154486507 | hypothetical protein                                                        |           |                |                         |
| Bifidobacterium longum 23465472        | Predicted transcriptional regulator                                         | COG2865   | K              |                         |
| Bifidobacterium adolescentis 154486695 | ABC-type phosphate transport system                                         | COG0226   | P              | K02040                  |
| Bifidobacterium longum 23466332        | Dihydroxyacid dehydratase/phosphogluconate dehydratase                      | COG0129   | EG             | K01687                  |
| Bifidobacterium adolescentis 154489143 | Predicted phosphatase/phosphohexomutase                                     | COG0637   | R              |                         |
| Bifidobacterium adolescentis 154486988 | Phosphoribosylaminoimidazole carboxylase                                    | COG0026   | F              | K01589                  |
| Bifidobacterium adolescentis 154486732 | glycoside hydrolase family 77                                               | COG1640   | G              | K00705                  |
| Bifidobacterium adolescentis 154487590 | Uncharacterized conserved protein                                           | COG3247   | S              |                         |
| Bifidobacterium adolescentis 154486669 | Acetyl-CoA carboxylase                                                      | COG4799   | I              | K01966                  |
| Bifidobacterium adolescentis 154488016 | Homoserine kinase                                                           | COG0083   | E              | K00872                  |
| Bifidobacterium adolescentis 119026221 | glycoside hydrolase family 43                                               |           |                |                         |
| Bifidobacterium adolescentis 119025727 | CTP synthase (UTP-ammonia lyase)                                            | COG0504   | F              | K01937                  |
| Bifidobacterium adolescentis 154486325 | Uncharacterized protein conserved in bacteria                               | COG3583   | S              |                         |
| Bifidobacterium adolescentis 119025371 | Transcription elongation factor                                             | COG0195   | K              | K02600                  |
| Bifidobacterium adolescentis 154486867 | Sugar (pentulose and hexulose) kinases                                      | COG1070   | G              | K00854                  |
| Bifidobacterium adolescentis 154487511 | putative cell division protein                                              |           |                |                         |
| Bifidobacterium adolescentis 154487124 | hypothetical protein                                                        |           |                |                         |
| Bifidobacterium adolescentis 119025212 | hypothetical protein                                                        |           |                |                         |
| Bifidobacterium adolescentis 154487481 | hypothetical protein                                                        |           |                |                         |
| Bifidobacterium adolescentis 154488824 | putative two-component sensor kinase                                        |           |                |                         |

|                                        |                                                                    |                             |      |                        |
|----------------------------------------|--------------------------------------------------------------------|-----------------------------|------|------------------------|
| Bifidobacterium adolescentis 154488224 | serine threonine protein kinase                                    |                             |      |                        |
| Bifidobacterium adolescentis 154487149 | carbohydrate esterase family 1                                     |                             |      |                        |
| Bifidobacterium adolescentis 154488135 | rRNA methylases                                                    | COG0566                     | J    | K00599                 |
| Bifidobacterium adolescentis 154489172 | glycoside hydrolase family 77                                      | COG1640                     | G    | K00705                 |
| Bifidobacterium adolescentis 154487327 | Superfamily II RNA helicase                                        | COG4581                     | L    | K03727                 |
| Bifidobacterium adolescentis 119025670 | Transcription elongation factor                                    | COG0782                     | K    | K03624                 |
| Bifidobacterium adolescentis 154486326 | Dimethyladenosine transferase                                      | COG0030                     | J    | K02528                 |
| Bifidobacterium longum 23465077        | glycosyl-transferase family 51                                     | COG0744                     | M    | K03693                 |
| Bifidobacterium longum 23464647        | hypothetical protein                                               | NOG25707                    |      |                        |
| Bifidobacterium adolescentis 154486363 | hypothetical protein                                               |                             |      |                        |
| Bifidobacterium adolescentis 154486438 | Permeases of the major facilitator superfamily                     | COG0477                     | GEPR |                        |
| Bifidobacterium longum 23335686        | ABC-type antimicrobial peptide transport system                    | COG0577                     | V    | K02004                 |
| Bifidobacterium adolescentis 154486327 | 4-diphosphocytidyl-2C-methyl-D-erythritol 2-phosphate synthase     | COG1947                     | I    | K00919                 |
| Bifidobacterium adolescentis 154488959 | twitching motility protein PilT                                    |                             |      | K02669                 |
| Bifidobacterium adolescentis 154486273 | Leucyl-tRNA synthetase                                             | COG0495                     | J    | K01869                 |
| Bifidobacterium adolescentis 154486329 | tRNA nucleotidyltransferase/poly(A) polymerase                     | COG0617                     | J    | K00970                 |
| Bifidobacterium adolescentis 154487191 | putative phage protein                                             |                             |      |                        |
| Bifidobacterium adolescentis 154486270 | DNA polymerase III, delta subunit                                  | COG1466                     | L    | K02340                 |
| Bifidobacterium adolescentis 154486380 | hypothetical protein                                               |                             |      |                        |
| Anaerostipes caccae 167747544          | Non-ribosomal peptide synthetase modules and related proteins      | COG1020                     | Q    |                        |
| Bifidobacterium adolescentis 154486501 | Predicted unusual protein kinase                                   | COG0661                     | R    |                        |
| Bifidobacterium adolescentis 154486855 | LacI-family transcriptional regulator                              |                             |      |                        |
| Bifidobacterium adolescentis 154486358 | Hemolysins and related proteins                                    | COG1253                     | R    | K03699                 |
| Bifidobacterium_adolescentis_154486649 | Acetylornithine deacetylase/Succinyl-diaminopimelate desuccinylase | COG0624                     | E    | K01439                 |
| Bifidobacterium adolescentis 119025555 | Orotidine-5'-phosphate decarboxylase                               | COG0284                     | F    | K01591                 |
| Bifidobacterium longum 23465600        | Gamma-glutamyl phosphate reductase                                 | COG0014                     | E    | K00147                 |
| Bifidobacterium adolescentis 154486786 | FAD synthase/riboflavin kinase/FMN adenylyltransferase             | COG0196                     | H    | K00861/0953            |
| Bifidobacterium adolescentis 154488712 | Ribonuclease D                                                     | COG0349                     | J    | K03684                 |
| Bifidobacterium_adolescentis_154488649 | N-acetylglutamate synthase (N-acetylornithine aminotransferase)    | COG1364                     | E    | K00620/0642            |
| Bifidobacterium adolescentis 154489082 | Ribonucleoside-triphosphate reductase                              | COG1328                     | F    | K00527                 |
| Bifidobacterium adolescentis 154487141 | transcriptional regulator, AraC family                             |                             |      |                        |
| Bifidobacterium longum 23335562        | Acetyltransferase (isoleucine patch superfamily)                   | COG0110                     | R    | K00680                 |
| Bifidobacterium adolescentis 119025600 | ABC-type amino acid transport system, permease component           | COG0765                     | E    |                        |
| Bifidobacterium adolescentis 154486349 | Recombinational DNA repair ATPase (RecF pathway)                   | COG1195                     | L    | K03629                 |
| Bifidobacterium adolescentis 154487341 | Succinyl-CoA synthetase                                            | COG0045                     | C    | K01903                 |
| Bifidobacterium adolescentis 154486419 | Adenylosuccinate synthase                                          | COG0104                     | F    | K01939                 |
| Bifidobacterium adolescentis 154486323 | transcriptional regulator, AraC family                             |                             |      |                        |
| Bifidobacterium adolescentis 119025197 | 3-isopropylmalate dehydratase large subunit                        | COG0065                     | E    | K01702/3               |
| Bifidobacterium adolescentis 154489094 | Predicted dehydrogenases and related proteins                      | COG0673                     | R    |                        |
| Bifidobacterium longum 23336262        | O-acetylhomoserine sulfhydrylase                                   | COG2873                     | E    | K01740                 |
| Bifidobacterium longum 23465907        | ABC-type dipeptide/oligopeptide/nickel transport systems           | COG0601                     | EP   | K02033                 |
| Bifidobacterium adolescentis 154487000 | Threonine aldolase                                                 | COG2008                     | E    | K01620                 |
| Bifidobacterium adolescentis 154487167 | Sortase and related acyltransferases                               | COG1247                     | M    | K03823                 |
| Bifidobacterium longum 23465198        | Thioredoxin reductase                                              | COG0492/0526                | OC   | K00384                 |
| Bifidobacterium_adolescentis_154488926 | Arabinose efflux permease                                          | COG2814                     | G    |                        |
| Bifidobacterium_longum_23465931        | ABC-type antimicrobial peptide transport system, ATPase component  | COG1136                     | V    | K02003/4               |
| Bifidobacterium adolescentis 154486352 | Type IIA topoisomerase (DNA gyrase/topo II, topoisomerase IV)      | COG0188                     | L    | K01863/2469            |
| Bifidobacterium adolescentis 119026009 | Pyruvate-formate lyase-activating enzyme                           | COG1180                     | O    | K04069                 |
| Bifidobacterium adolescentis 154487279 | Methionine synthase II (cobalamin-independent)                     | COG0620                     | E    | K00549                 |
| Bifidobacterium adolescentis 119025238 | Acetolactate synthase                                              | COG0440                     | E    | K01653                 |
| Bifidobacterium adolescentis 119025129 | Signal recognition particle GTPase                                 | COG0552                     | U    | K03110                 |
| Bifidobacterium adolescentis 154488132 | Asp-tRNAAsn/Glu-tRNAArgin amidotransferase                         | COG0154                     | J    | K02433                 |
| Bifidobacterium adolescentis 154486940 | ABC-type dipeptide transport system                                | COG0747                     | E    | K02035                 |
| Bifidobacterium adolescentis 154488789 | Type IIA topoisomerase (DNA gyrase/topo II, topoisomerase IV)      | COG0188                     | L    | K01863/2469            |
| Bifidobacterium adolescentis 154487377 | Long-chain acyl-CoA synthetases                                    | COG1022                     | I    | K01897                 |
| Bifidobacterium adolescentis 154488794 | DNA-directed RNA polymerase, sigma subunit                         | COG0568                     | K    | K03086                 |
| Bifidobacterium adolescentis 154488989 | Superfamily I DNA and RNA helicases                                | COG0210                     | L    | K01529                 |
| Bifidobacterium adolescentis 154486903 | Prolyl-tRNA synthetase                                             | COG0442                     | J    | K01881                 |
| Bifidobacterium adolescentis 154488684 | putative helicase                                                  |                             |      |                        |
| Bifidobacterium adolescentis 154486399 | Lysophospholipase                                                  | COG2267                     | I    |                        |
| Bifidobacterium adolescentis 119026611 | ABC-type sugar transport systems, ATPase components                | COG3839                     | G    | K05816                 |
| Bifidobacterium_adolescentis_154486670 | Putative fatty acid synthase/reductase                             | COG0304/0331/2030/4981/4982 | IQ   | K00059/209/665/666/680 |
| Bifidobacterium adolescentis 154488852 | ABC-type oligopeptide transport system                             | COG4166                     | E    | K02035                 |
| Bifidobacterium adolescentis 154486664 | putative ABC-type sugar transport system                           |                             |      |                        |
| Bifidobacterium adolescentis 119025257 | Ribonucleases G and E                                              | COG1530                     | J    | K01128                 |
| Bifidobacterium adolescentis 154486472 | ABC-type antimicrobial peptide transport system                    | COG0577                     | V    | K02004                 |
| Bifidobacterium adolescentis 154487036 | hypothetical protein                                               |                             |      |                        |
| Bifidobacterium adolescentis 154487636 | glycoside hydrolase family 2                                       | COG3250                     | G    | K01190                 |
| Eubacterium dolichum 160915695         | glycoside hydrolase family 31                                      |                             |      |                        |
| Bifidobacterium adolescentis 154489092 | Aspartate/tyrosine/aromatic aminotransferase                       | COG0436                     | E    | K00812                 |
| Bifidobacterium adolescentis 119026440 | hypothetical protein                                               | NOG21350                    |      |                        |
| Bifidobacterium adolescentis 119025397 | Myosin-crossreactive antigen                                       | COG4716                     | S    |                        |
| Bifidobacterium adolescentis 119026143 | Glutamine amidotransferase                                         | COG0118                     | E    | K02501                 |
| Bifidobacterium adolescentis 154487050 | Universal stress protein UspA                                      | COG0589                     | T    |                        |
| Bifidobacterium adolescentis 154486729 | Phosphoglycerate dehydrogenase                                     | COG0111                     | HE   |                        |
| Bifidobacterium adolescentis 154488261 | Predicted hydrolases or acyltransferases                           | COG0596                     | R    |                        |
| Bifidobacterium adolescentis 154489101 | hypothetical protein                                               |                             |      |                        |

|                                        |                                                                      |              |      |                  |
|----------------------------------------|----------------------------------------------------------------------|--------------|------|------------------|
| Bifidobacterium adolescentis 154487476 | Phosphotransacetylase                                                | COG0280/0857 | CR   | K00625           |
| Bifidobacterium adolescentis 154488788 | Uncharacterized proteins of the AP superfamily                       | COG1524      | R    |                  |
| Ruminococcus obeum 153809835           | putative ketose-bisphosphate aldolase                                |              |      |                  |
| Clostridium leptum 160933115           | hypothetical protein                                                 |              |      |                  |
| Bifidobacterium adolescentis 119026429 | Ribulose-5-phosphate 4-epimerase                                     | COG0235      | G    | K03080           |
| Bifidobacterium adolescentis 154487579 | glycoside hydrolase family 36                                        | COG3345      | G    | K07407           |
| Bifidobacterium longum 23464678        | hypothetical protein                                                 |              |      |                  |
| Bifidobacterium adolescentis 154486391 | Serine/threonine protein phosphatase                                 | COG0631      | T    | K01090           |
| Bifidobacterium adolescentis 154486962 | ABC-type amino acid transport/signal transduction systems            | COG0834      | ET   | K02030           |
| Bifidobacterium adolescentis 154486954 | DNA primase                                                          | COG0358      | L    | K02316           |
| Bifidobacterium adolescentis 154486993 | Glutamine phosphoribosylpyrophosphate amidotransferase               | COG0034      | F    | K00764           |
| Bifidobacterium adolescentis 154488913 | HrpA-like helicases                                                  | COG1643      | L    | K03578           |
| Bifidobacterium adolescentis 154486787 | Predicted ATP-dependent serine protease                              | COG1066      | O    | K04485           |
| Bifidobacterium adolescentis 154486493 | Ammonia permease                                                     | COG0004      | P    | K03320           |
| Bifidobacterium adolescentis 154487494 | Methenyl tetrahydrofolate cyclohydrolase                             | COG0190      | H    | K00288/1491      |
| Bifidobacterium adolescentis 119025196 | Transcriptional regulator                                            | COG1414      | K    |                  |
| Dorea longicatena 153853202            | hypothetical protein                                                 |              |      |                  |
| Bifidobacterium adolescentis 154487329 | putative transcriptional regulator                                   |              |      |                  |
| Bifidobacterium adolescentis 154487591 | LacI-family transcriptional regulator                                |              |      |                  |
| Bifidobacterium adolescentis 154486321 | glycoside hydrolase family 3                                         |              |      |                  |
| Bifidobacterium adolescentis 119025741 | GTPase                                                               | COG1159      | R    | K03595           |
| Clostridium scindens 167758922         | dUTPase                                                              | COG0756      | F    | K01520           |
| Bifidobacterium adolescentis 119025587 | Signal transduction histidine kinase                                 | COG0642      | T    |                  |
| Bifidobacterium adolescentis 154486470 | Predicted membrane protein                                           | COG4393      | S    |                  |
| Clostridium scindens 167760262         | putative sporulation protein                                         |              |      |                  |
| Bacteroides stercoris 167763769        | hypothetical protein                                                 |              |      |                  |
| Anaerostipes caccae 167746872          | putative ABC transporter                                             |              |      |                  |
| Bifidobacterium adolescentis 154486920 | ABC-type amino acid transport/signal transduction systems            | COG0834      | ET   | K02030           |
| Bifidobacterium adolescentis 154487063 | Uncharacterized conserved protein                                    | COG2326      | S    |                  |
| Bifidobacterium adolescentis 119025989 | glycoside hydrolase family 13                                        | COG0366      | G    | K01187           |
| Clostridium bartlettii 164687864       | Lactoylglutathione lyase                                             | COG0346      | E    | K01759           |
| Bifidobacterium adolescentis 154486443 | ABC-type antimicrobial peptide transport system                      | COG0577      | V    | K02004           |
| Bifidobacterium adolescentis 154488245 | NADH:flavin oxidoreductases/NADPH2 dehydrogenase                     | COG1902      | C    | K00354           |
| Bifidobacterium longum 23465963        | atypical histidine kinase sensor of two-component system             | NOG21560     |      |                  |
| Bifidobacterium adolescentis 154488949 | hypothetical protein                                                 |              |      |                  |
| Bifidobacterium adolescentis 154486865 | maltose O-acetyltransferase                                          |              |      |                  |
| Clostridium scindens 167759009         | cytidylate kinase                                                    |              |      | K00945           |
| Bifidobacterium adolescentis 154486901 | ATP-dependent exoDNase                                               | COG0507      | L    |                  |
| Ruminococcus torques 153814251         | hypothetical protein                                                 |              |      |                  |
| Bifidobacterium adolescentis 119025327 | Ribosomal protein L13                                                | COG0102      | J    | K02871           |
| Bifidobacterium adolescentis 154488916 | ABC-type antimicrobial peptide transport system                      | COG1136      | V    |                  |
| Bifidobacterium adolescentis 119025389 | putative histidine kinase sensor of two component system             |              |      |                  |
| Ruminococcus_gnavus_154504598          | Translation elongation factor P (EF-P)/initiation factor 5A (eIF-5A) | COG0231      | J    | K02356           |
| Bifidobacterium adolescentis 119026648 | ribonuclease P                                                       | NOG21633     |      | K03536           |
| Clostridium scindens 167760715         | hypothetical protein                                                 |              |      |                  |
| Bifidobacterium adolescentis 119026098 | Uncharacterized conserved protein                                    | COG2606      | S    |                  |
| Clostridium scindens 167761320         | ABC-type antimicrobial peptide transport system                      | COG1136      | V    | K02003           |
| Bacteroides stercoris 167762249        | hypothetical protein                                                 |              |      |                  |
| Anaerostipes caccae 167746530          | putative ion channel                                                 |              |      |                  |
| Bifidobacterium adolescentis 119025057 | Serine/threonine protein kinase                                      | COG0515      | RTKL |                  |
| Clostridium bartlettii 164686672       | Molybdopterin biosynthesis enzymes                                   | COG0521      | H    | K03638           |
| Ruminococcus obeum 153811887           | hypothetical protein                                                 |              |      |                  |
| Clostridium spiroforme 169349879       | protein-Np-phosphohistidine-sugar phosphotransferase                 |              |      | K00890           |
| Clostridium ramosum 167756439          | type I restriction enzyme, S subunit                                 |              |      | K01154           |
| Bifidobacterium adolescentis 119025640 | Short-chain alcohol dehydrogenase of unknown specificity             | COG4221      | R    |                  |
| Eubacterium ventriosum 154483925       | Uncharacterized conserved protein                                    | COG2501      | S    |                  |
| Bifidobacterium adolescentis 154487477 | Phosphoketolase                                                      | COG3957      | G    | K01621/32/36     |
| Bifidobacterium_adolescentis_154489149 | Putative molecular chaperone                                         | COG0443      | O    | K01529/4043/8070 |
| Bifidobacterium adolescentis 119025585 | hypothetical protein                                                 |              |      |                  |
| Clostridium scindens 167759334         | ABC-type antimicrobial peptide transport system                      | COG1136      | V    | K02003           |
| Anaerostipes_caccae_167748732          | Serine-pyruvate aminotransferase/archaeal aspartate aminotransferase | COG0075      | E    | K03430           |
| Ruminococcus_gnavus_154505702          | Putative phage replication protein RstA                              | COG2946      | L    | K07467           |
| Bifidobacterium adolescentis 154486389 | Cell division protein FtsI                                           | COG0768      | M    |                  |
| Bifidobacterium adolescentis 154488668 | ABC-type cobalt transport system                                     | COG1122      | P    | K02006           |
| Bifidobacterium adolescentis 154486277 | Fructose-2,6-bisphosphatase/phosphoglycerate mutase                  | COG0406      | G    | K01834           |
| Clostridium scindens 167758556         | hypothetical protein                                                 |              |      |                  |
| Dorea longicatena 153855715            | putative acetyltransferase                                           |              |      |                  |
| Eubacterium dolichum 160915136         | ABC-type antimicrobial peptide transport system                      | COG1136      | V    | K02003           |
| Bifidobacterium adolescentis 119026205 | Isoleucyl-tRNA synthetase                                            | COG0060      | J    | K01870           |
| Ruminococcus obeum 153810514           | glycoside hydrolase family 23                                        | COG0741/91   | M    |                  |
| Eubacterium eligens Contiq2011.538     | putative phosphohydrolase                                            |              |      |                  |
| Bifidobacterium adolescentis 154487387 | Transcriptional regulator                                            | COG0583      | K    |                  |
| Ruminococcus obeum 153812199           | putative flavodoxin                                                  |              |      |                  |
| Bifidobacterium adolescentis 154486996 | Phosphoribosylformylglycinamide (FGAM) synthase                      | COG0046/7    | F    | K01952           |
| Dorea longicatena 153854194            | Ornithine/acetylornithine aminotransferase                           | COG4992      | E    | K00818           |
| Ruminococcus_gnavus_154505209          | Predicted GTPases                                                    | COG1160      | R    |                  |
| Dorea longicatena 153853531            | Predicted transcriptional regulators                                 | COG1695      | K    |                  |
| Ruminococcus torques 153814203         | Acetyltransferases                                                   | COG0456      | R    | K03826           |

|                                        |                                                      |              |    |          |
|----------------------------------------|------------------------------------------------------|--------------|----|----------|
| Clostridium scindens 167761371         | putative ABC-type transport system                   |              |    |          |
| Bifidobacterium longum 38906105        | F0F1-type ATP synthase                               | COG0055      | C  | K02112   |
| Collinsella aerofaciens 139439837      | hypothetical protein                                 |              |    |          |
| Clostridium leptum 160933570           | ABC-type antimicrobial peptide transport system      | COG0577/1136 | V  | K02003   |
| Eubacterium rectale 2731               | putative sensor histidine kinase                     |              |    |          |
| Bifidobacterium adolescentis 154489126 | ABC-type multidrug transport system                  | COG1132      | V  | K06147   |
| Ruminococcus obeum 153812105           | putative conjugative transposon protein              | NOG05968     |    |          |
| Dorea longicatena 153853999            | hypothetical protein                                 |              |    |          |
| Clostridium bolteae 160937390          | hypothetical protein                                 |              |    |          |
| Ruminococcus torques 153814809         | cytidylate kinase                                    |              |    | K00945   |
| Ruminococcus obeum 153810530           | hypothetical protein                                 |              |    |          |
| Clostridium scindens 167758273         | putative alanine racemase                            |              |    |          |
| Clostridium scindens 167760222         | putative ABC transporter                             |              |    |          |
| Dorea longicatena 153854759            | Sporulation protein                                  | COG2088      | M  | K06412   |
| Bifidobacterium adolescentis 119025414 | glycosyl-transferase family 4                        |              |    |          |
| Ruminococcus obeum 153813075           | hypothetical protein                                 |              |    |          |
| Eubacterium ventriosum 154482695       | Queuine/archaeosine tRNA-ribosyltransferase          | COG0343      | J  | K00773   |
| Ruminococcus obeum 153811892           | hypothetical protein                                 |              |    |          |
| Ruminococcus obeum 153810246           | Type IV secretory pathway, VirB4 components          | COG3451      | U  |          |
| Dorea longicatena 153854838            | Ribosomal protein S16                                | COG0228      | J  | K02959   |
| Dorea longicatena 153855241            | putative DNA gyrase, subunit A                       |              |    |          |
| Collinsella aerofaciens 139438412      | putative transcriptional regulator                   |              |    |          |
| Clostridium leptum 160934853           | putative ribosomal-protein-alanine acetyltransferase |              |    |          |
| Eubacterium rectale 3602               | Type IV secretory pathway, VirD4 components          | COG3505      | U  |          |
| Bifidobacterium adolescentis 154486460 | ABC-type multidrug transport system                  | COG1132      | V  | K06147   |
| Anaerostipes caccae 167746203          | exonuclease SbcC                                     |              |    | K03546   |
| Ruminococcus obeum 153813732           | hypothetical protein                                 |              |    |          |
| Eubacterium ventriosum 154484729       | protein-Np-phosphohistidine-sugar phosphotransferase |              |    | K00890   |
| Eubacterium rectale 3363               | putative ABC transporter                             |              |    |          |
| Ruminococcus obeum 153809913           | hypothetical protein                                 |              |    |          |
| Anaerostipes caccae 167748861          | putative arylsulfate sulfotransferase                |              |    |          |
| Eubacterium eligens Contiq2011.154     | Uncharacterized conserved protein                    | COG4283      | S  |          |
| Clostridium scindens 167759418         | putative competence protein ComEA                    |              |    |          |
| Eubacterium rectale 3439               | putative RNA-directed DNA polymerase                 |              |    |          |
| Clostridium bolteae 160940954          | SAM-dependent methyltransferases                     | COG0500      | QR | K00599   |
| Ruminococcus obeum 153811726           | putative DNA topoisomerase                           |              |    |          |
| Ruminococcus obeum 153813044           | putative transposase                                 |              |    |          |
| Eubacterium rectale 2410               | type I restriction enzyme, R subunit                 |              |    | K01152/3 |
| Clostridium bolteae 160941795          | putative recombination protein                       |              |    |          |
| Bifidobacterium adolescentis 154486724 | putative esterase                                    |              |    |          |
| Collinsella aerofaciens 139438485      | putative amidohydrolase                              |              |    |          |

\*Protein sequences from *E.rectale*, *E.eligens*, *B.theta3731*, *B.theta7330*, and *B.WH2* can be found at <http://gordonlab.wustl.edu/SuppData.html>

**Supplementary Table 14: Bacterial genes enriched in the gut microbiomes of lean MZ twins**

| Genome and NCBI proteinID*             | Annotation                                                        | COG          | COG Categories | KEGG orthologous groups |
|----------------------------------------|-------------------------------------------------------------------|--------------|----------------|-------------------------|
| Bacteroides capillosus 154500567       | putative amidohydrolase                                           |              |                |                         |
| Clostridium leptum 160934848           | putative acetyltransferase                                        |              |                |                         |
| Ruminococcus obeum 153810033           | phosphocarrier protein HPr                                        |              |                | K02784                  |
| Eubacterium siraeum 167749283          | putative ABC transporter related protein                          |              |                |                         |
| Bacteroides capillosus 154497054       | Polyribonucleotide nucleotidyltransferase                         | COG1185      | J              | K00962                  |
| Eubacterium siraeum 167749675          | Isoleucyl-tRNA synthetase                                         | COG0060      | J              | K01870                  |
| Eubacterium rectale 3617               | hypothetical protein                                              |              |                |                         |
| Bacteroides capillosus 154498345       | putative sporulation protein                                      |              |                |                         |
| Parabacteroides merdae 154490921       | hypothetical protein                                              |              |                |                         |
| Bacteroides capillosus 154500960       | putative chromosome segregation protein                           |              |                |                         |
| Ruminococcus torques 153814925         | putative sporulation protein                                      |              |                |                         |
| Clostridium scindens 167758815         | glycosyl-transferase family 4                                     |              |                |                         |
| Clostridium sp. L2 50 160893842        | Protease subunit of ATP-dependent Clp proteases                   | COG0740      | OU             | K01358                  |
| B WH2 000545                           | putative type I restriction enzyme EcoAI specificity protein      |              |                |                         |
| Bacteroides capillosus 154500843       | trk system potassium uptake protein TrkA                          |              |                | K03499                  |
| Clostridium bolteae 160936948          | putative two-component transcriptional regulator                  |              |                |                         |
| Bacteroides capillosus 154498005       | ATP-dependent serine protease/cysteine S-methyltransferase        | COG1066      | O              | K00567                  |
| Parabacteroides merdae 154492394       | hypothetical protein                                              |              |                |                         |
| Bacteroides capillosus 154498009       | Fructose/tagatose bisphosphate aldolase                           | COG0191      | G              | K01622                  |
| B theta 3731 000845                    | hypothetical protein                                              |              |                |                         |
| Anaerotruncus colihominis 167769594    | Predicted ATPase (AAA+ superfamily)                               | COG1373      | R              |                         |
| Bacteroides capillosus 154500228       | putative translation protein                                      |              |                |                         |
| Anaerofustis stercorihominis 169334667 | putative DNA recombinase                                          |              |                |                         |
| B theta 3731 003400                    | hypothetical protein                                              |              |                |                         |
| Parabacteroides distasonis 150008749   | hypothetical protein                                              |              |                |                         |
| Bacteroides fragilis 19068109          | mobilization protein BmgA                                         | NOG11714     |                |                         |
| Eubacterium dolichum 160914154         | glycoside hydrolase family 20                                     | COG3525      | G              | K01207                  |
| Bacteroides capillosus 154497125       | RNA methyltransferase, TrmH family                                |              |                | K03218                  |
| Clostridium sp. L2 50 160894658        | NTP pyrophosphohydrolases                                         | COG0494/3323 | LRS            | K03574                  |
| Parabacteroides merdae 154494925       | Glyceraldehyde-3-phosphate dehydrogenase                          | COG0057      | G              | K00134                  |
| Bacteroides capillosus 154496139       | Type IIA topoisomerase (DNA gyrase/topo II, topoisomerase IV)     | COG0188      | L              | K01863/2469             |
| Clostridium ramosum 167755346          | MoxR-like ATPase                                                  |              |                | K03924                  |
| Bacteroides uniformis 160888848        | hypothetical protein                                              |              |                |                         |
| Ruminococcus gnavus 154504651          | Putative translation initiation inhibitor                         | COG0251      | J              | K07567                  |
| Bacteroides uniformis 160890270        | putative phage protein                                            |              |                |                         |
| Bacteroides capillosus 154500164       | putative DNA recombinase                                          |              |                |                         |
| B WH2 000807                           | sulfotransferase/FAD synthetase                                   | COG0175      | EH             | K00957                  |
| Bacteroides uniformis 160892052        | carbohydrate esterase family 4 and 12                             |              |                |                         |
| Clostridium sp. L2 50 160893671        | hypothetical protein                                              |              |                |                         |
| Bacteroides capillosus 154500952       | hypothetical protein                                              |              |                | K09710                  |
| Clostridium scindens 167759293         | putative ribonucleoside-triphosphate reductase activating protein |              |                |                         |
| Bacteroides capillosus 154498134       | Predicted GTPases                                                 | COG1160      | R              | K03977                  |
| Bacteroides capillosus 154500412       | ribosomal protein                                                 |              |                |                         |
| Bacteroides fragilis 60683403          | Imidazolonepropionase and related amidohydrolases                 | COG1228      | Q              | K01468                  |
| Peptostreptococcus micros 160946111    | hypothetical protein                                              | NOG15344     |                |                         |
| B theta 7330 001524                    | putative transposase                                              |              |                |                         |
| Bacteroides capillosus 154500229       | putative peptidase                                                |              |                |                         |
| Bacteroides vulgatus 150006208         | Integrase                                                         | COG0582      | L              |                         |
| Bacteroides capillosus 154501540       | hypothetical protein                                              |              |                |                         |
| Bacteroides stercoris 167762500        | Site-specific recombinase XerD                                    | COG4974      | L              |                         |
| Bacteroides fragilis 60679880          | glycoside hydrolase family 38                                     | COG0383      | G              | K01191                  |
| Bacteroides capillosus 154497979       | putative replication protein                                      |              |                |                         |
| Bacteroides capillosus 154500160       | putative helicase                                                 |              |                |                         |
| Bacteroides stercoris 167752230        | Retron-type reverse transcriptase                                 | COG3344      | L              |                         |
| B WH2 003792                           | hypothetical protein                                              | NOG14996     |                |                         |
| Bacteroides capillosus 154497731       | hypothetical protein                                              |              |                |                         |
| Parabacteroides merdae 154494117       | UDP-N-acetyl-D-mannosaminuronate dehydrogenase                    | COG0677      | M              | K02472                  |
| Bacteroides caccae 153807847           | 2-succinyl-6-hydroxy-2,4-cyclohexadiene-1-carboxylate synthase    | COG1165      | H              | K02551                  |
| Anaerotruncus colihominis 167771309    | N-acetylglutamate synthase (N-acetylornithine aminotransferase)   | COG1364      | E              | K00618                  |
| B WH2 003808                           | putative outer membrane protein                                   |              |                |                         |
| Eubacterium dolichum 160914195         | putative copper-translocating P-type ATPase                       |              |                | K01529                  |
| Bacteroides fragilis 53715551          | Predicted ATPase                                                  | COG1373      | R              |                         |
| Clostridium bolteae 160937654          | putative phage protein                                            |              |                |                         |
| Bacteroides fragilis 53712550          | Alkyl hydroperoxide reductase                                     | COG3634      | O              | K03387                  |
| Parabacteroides merdae 154492101       | hypothetical protein                                              |              |                |                         |
| Clostridium bolteae 160936352          | Uncharacterized conserved protein                                 | COG2606      | S              |                         |
| Bacteroides uniformis 160889340        | TraM                                                              |              |                |                         |
| B theta 7330 002089                    | Adenine-specific DNA methylase                                    | COG0827/4646 | KL             |                         |
| B WH2 003982                           | putative outer membrane protein                                   |              |                |                         |
| Bacteroides capillosus 154496743       | hypothetical protein                                              |              |                |                         |
| Clostridium bolteae 160941240          | putative citrate lyase                                            |              |                |                         |
| Bacteroides capillosus 154496327       | putative v-type ATPase                                            |              |                |                         |
| Bacteroides capillosus 154496839       | putative cobalamin biosynthesis protein                           |              |                |                         |
| Bacteroides fragilis 60683742          | Small-conductance mechanosensitive channel                        | COG0668      | M              |                         |



|                                      |                                                              |          |    |             |
|--------------------------------------|--------------------------------------------------------------|----------|----|-------------|
| Eubacterium siraeum 167749611        | putative transcriptional regulator                           |          |    |             |
| Parabacteroides distasonis 150007998 | Cobyrinic acid synthase                                      | COG1492  | H  | K02232      |
| Parabacteroides distasonis 150008480 | putative pyruvate formate-lyase 3 activating enzyme          |          |    |             |
| Bacteroides capillosus 154496329     | Na <sup>+</sup> -transporting two-sector ATPase/ATP synthase |          |    | K01549/50   |
| Bacteroides capillosus 154496850     | hypothetical protein                                         |          |    |             |
| Bacteroides capillosus 154496749     | putative spore maturation protein                            |          |    |             |
| Bacteroides capillosus 154496148     | putative spore protease                                      |          |    |             |
| Clostridium bolteae 160937655        | DNA polymerase                                               |          |    | K00961      |
| Bacteroides fragilis 60683107        | Putative copper/silver efflux pump                           | COG3696  | P  | K07239/7787 |
| Bacteroides capillosus 154496295     | putative short-chain dehydrogenase/reductase                 |          |    |             |
| Anaerotruncus colihominis 167771023  | stage V sporulation protein AC                               |          |    | K06405      |
| B_WH2_004992                         | ABC-type multidrug transport system                          | COG0842  | V  | K09686      |
| Bacteroides capillosus 154500409     | Transcription antiterminator                                 | COG0250  | K  | K02601      |
| B_theta_3731_003445                  | putative tyrosine type site-specific recombinase             | NOG36763 |    |             |
| B_WH2_003671                         | putative 3-oxoacyl-[acyl-carrier-protein] synthase           |          |    |             |
| Parabacteroides distasonis 150010457 | hypothetical protein                                         |          |    |             |
| Bacteroides fragilis 60681723        | putative hydrolase lipoprotein                               | NOG09493 |    |             |
| Clostridium scindens 167758928       | putative transcriptional regulator                           |          |    |             |
| Bacteroides capillosus 154498046     | Exonuclease VII small subunit                                | COG1722  | L  | K03602      |
| Ruminococcus gnavus 154504691        | putative phage protein                                       |          |    |             |
| Anaerotruncus colihominis 167772969  | hypothetical protein                                         |          |    |             |
| Bacteroides caccae 153808785         | Predicted nucleoside-diphosphate sugar epimerases            | COG1086  | MG |             |
| Alistipes putredinis 167751920       | phosphoglycolate phosphatase                                 |          |    | K01091      |
| Anaerotruncus colihominis 167772790  | hypothetical protein                                         |          |    |             |
| Parabacteroides merdae 154494124     | putative transcriptional regulator                           |          |    |             |
| Bacteroides caccae 153809523         | glycoside hydrolase family 29                                | COG3669  | G  | K01206      |
| Bacteroides fragilis 46242778        | TraO conjugation protein                                     |          |    |             |
| Bacteroides capillosus 154499075     | putative site-specific recombinase                           |          |    |             |
| Anaerotruncus colihominis 163816273  | putative DNA helicase                                        |          |    |             |
| Bacteroides capillosus 154495881     | Pentose-5-phosphate-3-epimerase                              | COG0036  | G  | K01783      |
| Bacteroides uniformis 160887913      | hypothetical protein                                         |          |    |             |
| Dorea longicatena 153853397          | putative phage protein                                       |          |    |             |
| Bacteroides vulgatus 150003721       | putative outer membrane protein                              |          |    |             |
| B_WH2_002145                         | putative outer membrane protein                              |          |    |             |
| Bacteroides capillosus 154500525     | hypothetical protein                                         |          |    |             |
| Alistipes putredinis 167752229       | putative DNA primase                                         | NOG22337 |    |             |

\*Protein sequences from *E.rectale*, *E.eligens*, *B.theta3731*, *B.theta7330*, and *B.WH2* can be found at <http://gordonlab.wustl.edu/SuppData.html>

**Supplementary Table 15: BMI category in the Missouri Adolescent Female Twin Study<sup>a</sup>.**

|                        | <b>Underweight<br/>(n=138)</b> | <b>Lean<br/>(n=1893)</b> | <b>Overweight<br/>(n=711)</b> | <b>Obese I<br/>(n=309)</b> | <b>Obese II<br/>(n=174)</b> | <b>Obese III<br/>(n=113)</b> |
|------------------------|--------------------------------|--------------------------|-------------------------------|----------------------------|-----------------------------|------------------------------|
| <b>EA<br/>(n=2860)</b> | 4.79                           | 60.87                    | 19.58                         | 8.08                       | 4.27                        | 2.41                         |
| <b>AA<br/>(n=478)</b>  | 0.21                           | 31.80                    | 31.59                         | 16.32                      | 10.88                       | 9.21                         |

<sup>a</sup>All numbers are percentages. Underweight: <18.5 kg/m<sup>2</sup>; Lean 18.5-24.9 kg/m<sup>2</sup>; Overweight: 25-29.9 kg/m<sup>2</sup>; Obese I: 30-34.9 kg/m<sup>2</sup>; Obese II: 35-39.9 kg/m<sup>2</sup>; Obese III: ≥40 kg/m<sup>2</sup>.
